# Supplementary material
Source: PubMed Central journal article supplement (PMC7530112)

## *Supporting Information*

### **Novel HIV-1 Capsid-Targeting Small Molecules of the PF74**

#### **Binding Site**

*Lei Wang*<sup>a, §</sup>, *Mary C. Casey*<sup>b</sup>, *Sanjeev Kumar V. Vernekar*<sup>a</sup>, *Rajkumar Lalji Sahani*<sup>a</sup>, *Jayakanth Kankanala*<sup>a</sup>, *Karen A. Kirby*<sup>c</sup>, *Haijuan Du*<sup>c</sup>, *Atsuko Hachiya*<sup>d</sup>, *Huanchun Zhang*<sup>c</sup>, *Philip R. Tedbury*<sup>c</sup>, *Jiashu Xie*<sup>a</sup>, *Stefan G. Sarafianos*<sup>c</sup>, and *Zhengqiang Wang*<sup>\*, a</sup>

*a Center for Drug Design, College of Pharmacy, University of Minnesota, Minneapolis, MN 55455, USA*

*b Department of Molecular Microbiology and Immunology, University of Missouri School of Medicine, Christopher S. Bond Life Sciences Center, Columbia, MO 65211, USA*

*c Laboratory of Biochemical Pharmacology, Department of Pediatrics, Emory University School of Medicine, Atlanta, GA 30322, USA*

*d Clinical Research Center, Nagoya Medical Center, National Hospital Organization, Nagoya, Aichi 460-0001, Japan*

*§ Present address: Department of Pharmacy, School of Chemical Engineering, Dalian University of Technology, Dalian 116024, China*

#### **Table of Contents**

|                            |          |
|----------------------------|----------|
| Synthesis of intermediates | S2 – S4  |
| NMR spectra                | S5 – S58 |

## Synthesis of intermediates

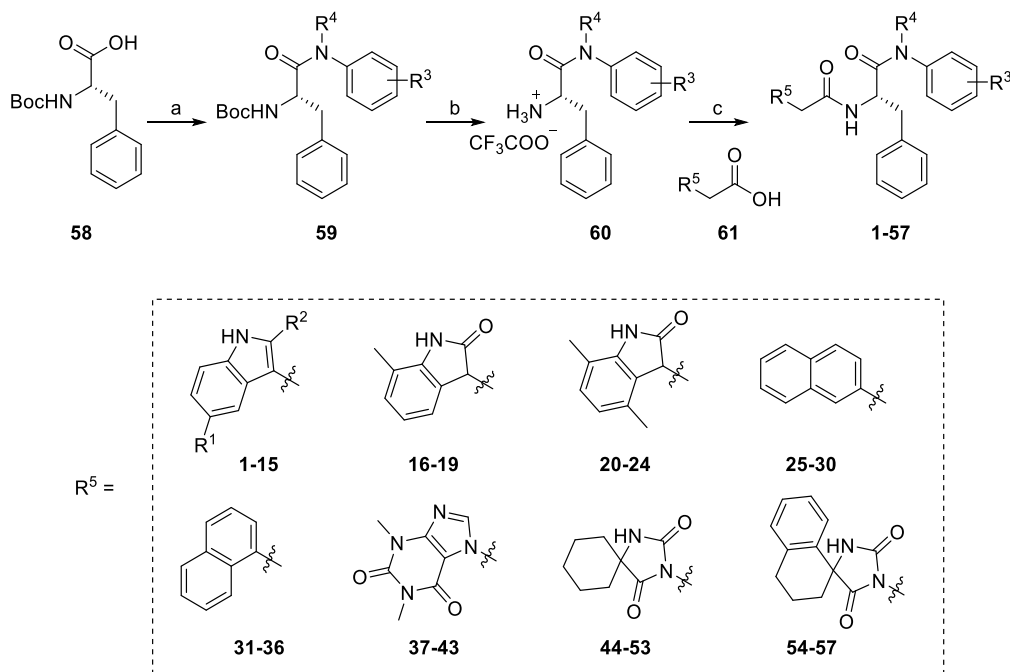

Reagents and conditions: (a) amine, HATU (or T<sub>3</sub>P), DIPEA, DMF, rt, 12 h; (b) TFA; DCM, rt, 4-6 h; (c) HATU, DIPEA, DMF, rt, 12 h.

*Synthesis of 59:* To a solution of commercially available (*tert*-butoxycarbonyl)-*L*-phenylalanine (1.0 g, 3.8 mmol, 1 equiv.) in DMF (5 mL), HATU or T<sub>3</sub>P (2 equiv.) and DIPEA (2 equiv.) were added and the mixture was stirred at room temperature for 20 min before amine (1.5 equiv.) was added. The mixture was further stirred at room temperature overnight. Upon completion, H<sub>2</sub>O was added and the reaction mixture was extracted with EtOAc (3x50 mL). The organic phases were combined and washed with brine, dried over anhydrous MgSO<sub>4</sub>, filtered and concentrated. The product was purified by Combi-flash on silica gel using EtOAc/hexane (1:4 to 2:1) as eluent.

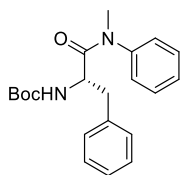

Yield 68-89%.  $^1\text{H NMR}$  (600 MHz,  $\text{CDCl}_3$ )  $\delta$  7.39 – 7.29 (m, 3H), 7.20 – 7.19 (m, 3H), 6.94 – 6.80 (m, 4H), 5.17 (d,  $J = 9.0$  Hz, 1H), 4.53 (q,  $J = 7.5, 6.8$  Hz, 1H), 3.21 (s, 3H), 2.87 (dd,  $J = 13.2, 7.4$  Hz, 1H), 2.69 (dd,  $J = 13.0, 6.8$  Hz, 1H), 1.38 (s, 9H).

*Synthesis of 60:* TFA (5 equiv.) was added dropwise to a solution of **59** (1 equiv.) in DCM (5 mL) and the mixture was stirred at room temperature for 4-6 h. The solvent was evaporated to give the product as a TFA salt.

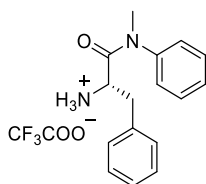

$^1\text{H NMR}$  (600 MHz,  $\text{DMSO}-d_6$ )  $\delta$  7.36 – 7.31 (m, 3H), 7.20 – 7.14 (m, 3H), 6.96 – 6.90 (m, 2H), 6.83 (d,  $J = 8.2$  Hz, 2H), 3.30 (t,  $J = 6.8$  Hz, 1H), 3.06 (s, 3H), 2.71 (dd,  $J = 12.7, 6.8$  Hz, 1H), 2.43 (dd,  $J = 13.2, 7.8$  Hz, 1H).

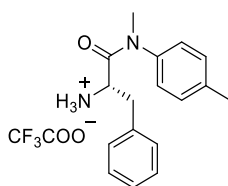

$^1\text{H NMR}$  (600 MHz,  $\text{DMSO}-d_6$ )  $\delta$  7.20 – 7.12 (m, 5H), 6.86 – 6.80 (m, 4H), 3.33 – 3.30 (m, 1H), 3.02 (s, 3H), 2.71 (dd,  $J = 13.1, 7.3$  Hz, 1H), 2.44 (dd,  $J = 12.8, 6.8$  Hz, 1H), 2.28 (s, 3H).

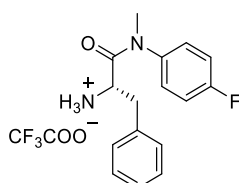

$^1\text{H}$  NMR (600 MHz,  $\text{CDCl}_3$ )  $\delta$  7.32 – 7.27 (m, 4H), 6.98 – 6.93 (m, 5H), 4.09 – 4.06 (m, 1H), 3.12 (s, 3H), 3.05 – 3.04 (m, 2H).

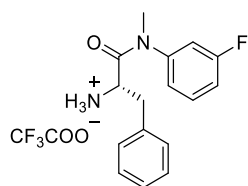

$^1\text{H}$  NMR (600 MHz,  $\text{CDCl}_3$ )  $\delta$  7.32 – 7.22 (m, 5H), 7.00 – 6.97 (m, 4H), 4.17 – 4.14 (m, 1H), 3.11 (s, 3H), 3.10 – 3.03 (m, 2H).

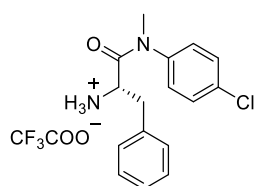

$^1\text{H}$  NMR (600 MHz,  $\text{CDCl}_3$ )  $\delta$  7.37 – 7.20 (m, 6H), 6.98 – 6.97 (m, 3H), 4.12 – 4.10 (m, 1H), 3.10 (s, 3H), 3.08 – 3.02 (m, 2H).

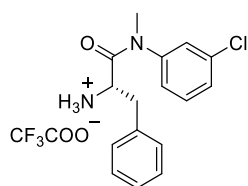

$^1\text{H}$  NMR (600 MHz,  $\text{CDCl}_3$ )  $\delta$  7.37 – 7.21 (m, 7H), 6.98 – 6.97 (m, 2H), 4.15 – 4.12 (m, 1H), 3.12 (s, 3H), 3.10 – 3.03 (m, 2H).

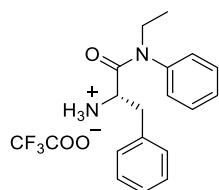

$^1\text{H}$  NMR (600 MHz,  $\text{CDCl}_3$ )  $\delta$  7.31 – 7.23 (m, 8H), 6.97 – 6.96 (m, 2H), 4.03 – 4.00 (m, 1H), 3.76 – 3.72 (m, 1H), 3.48 – 3.43 (m, 1H), 3.08 – 3.01 (m, 2H), 1.00 (t,  $J = 7.2$  Hz, 3H).

# NMR spectra

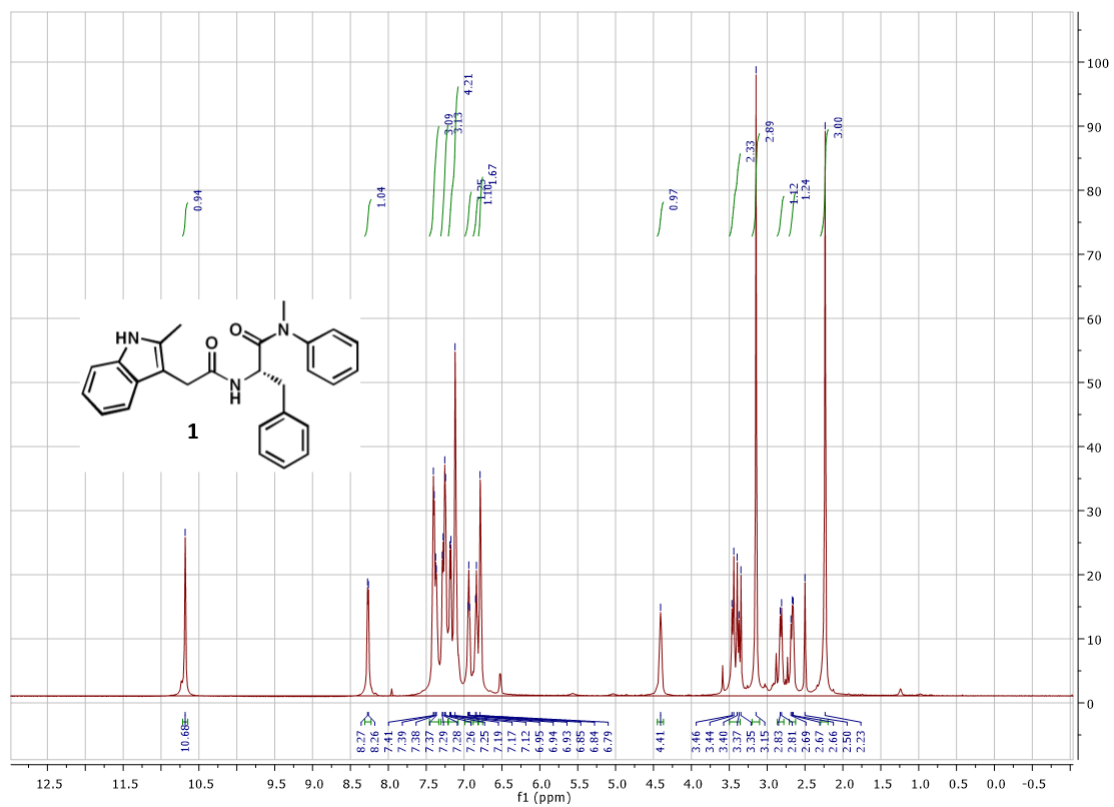

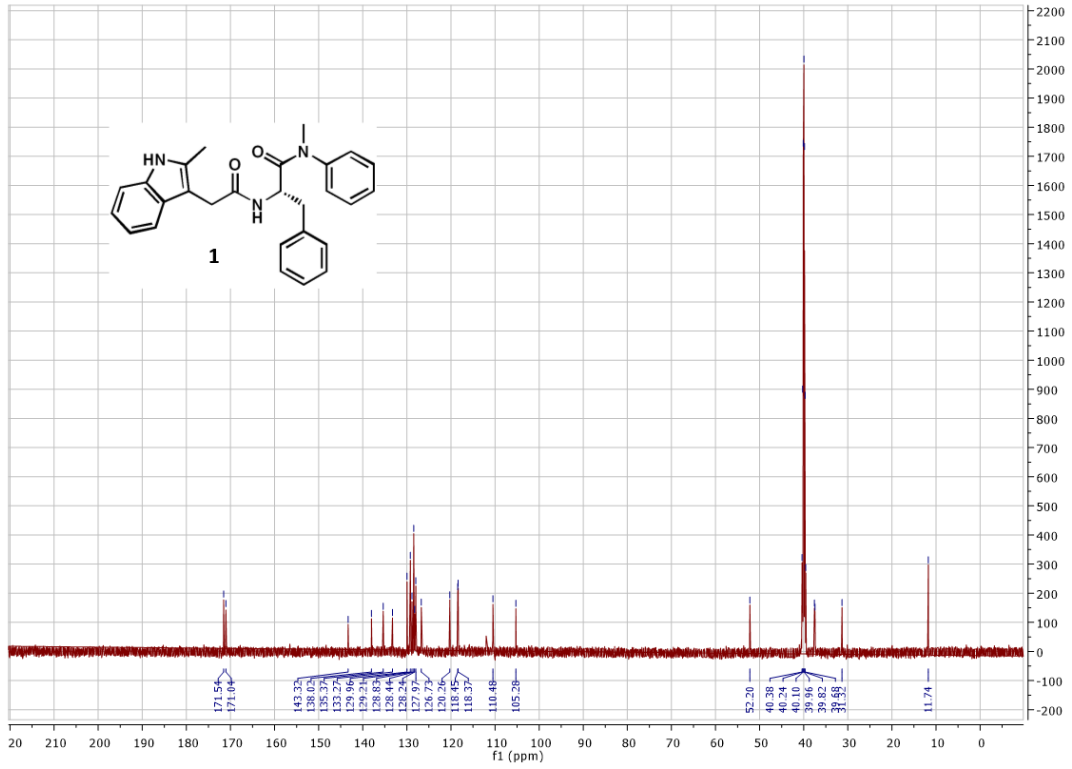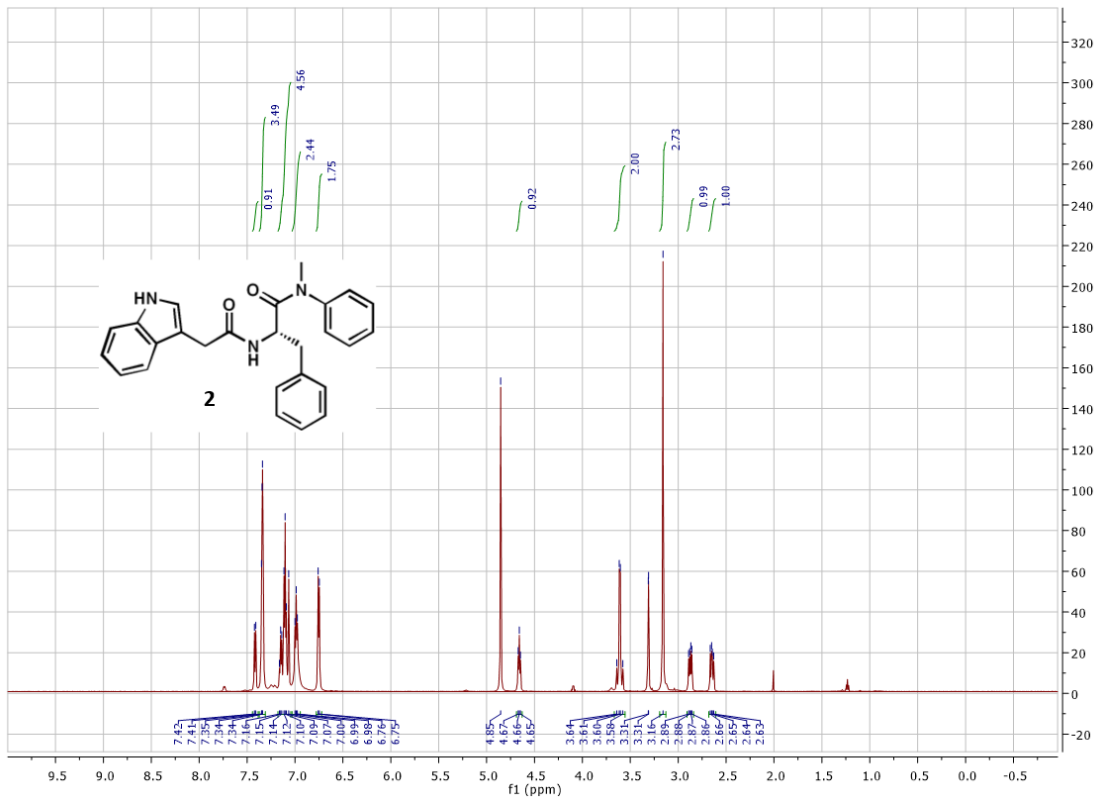

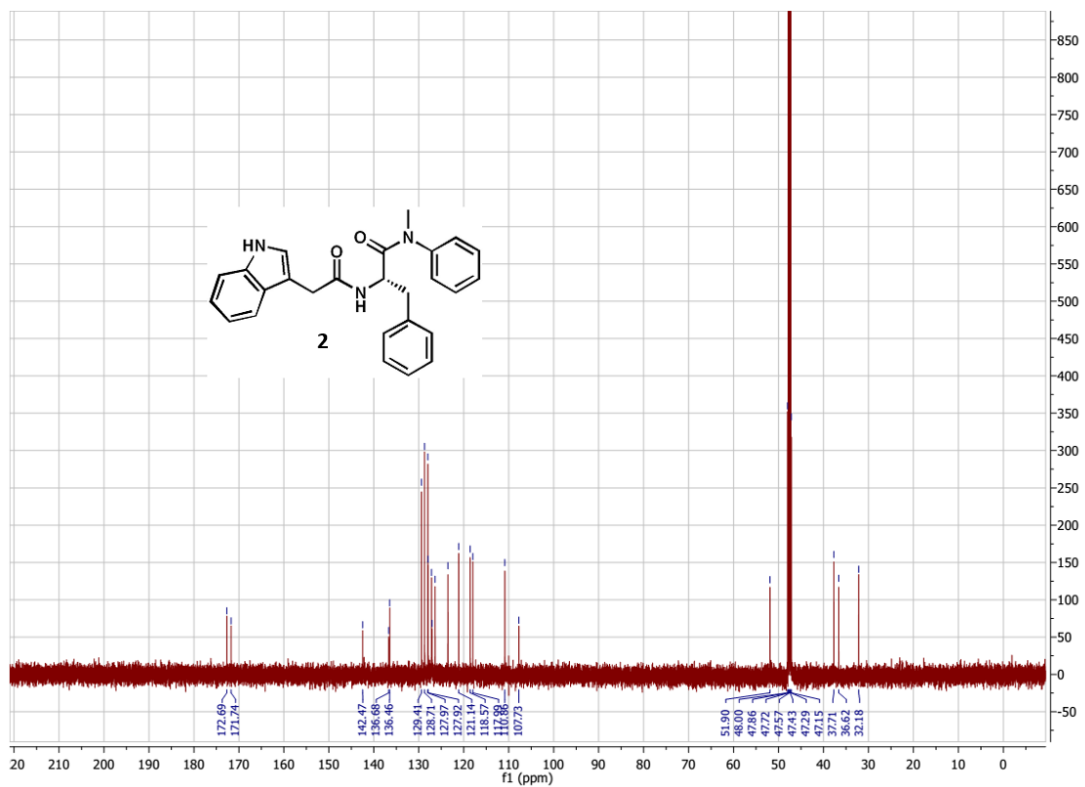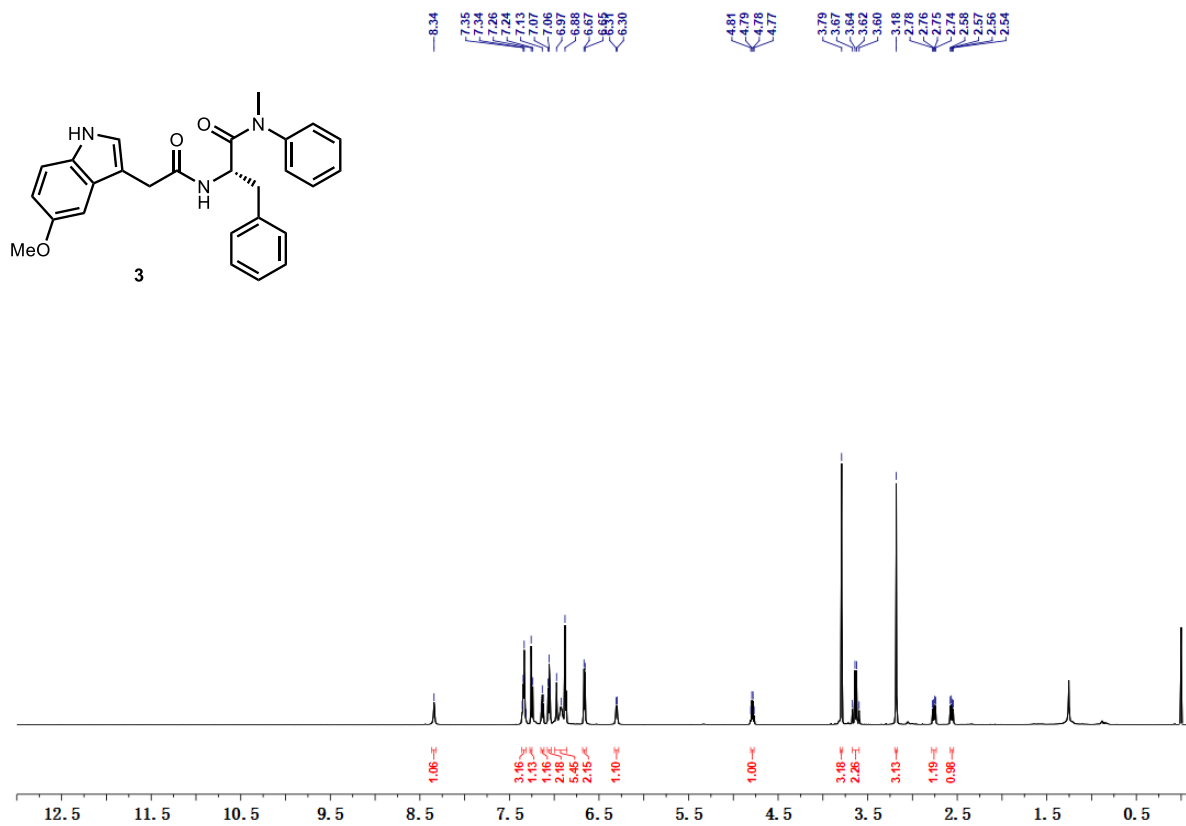

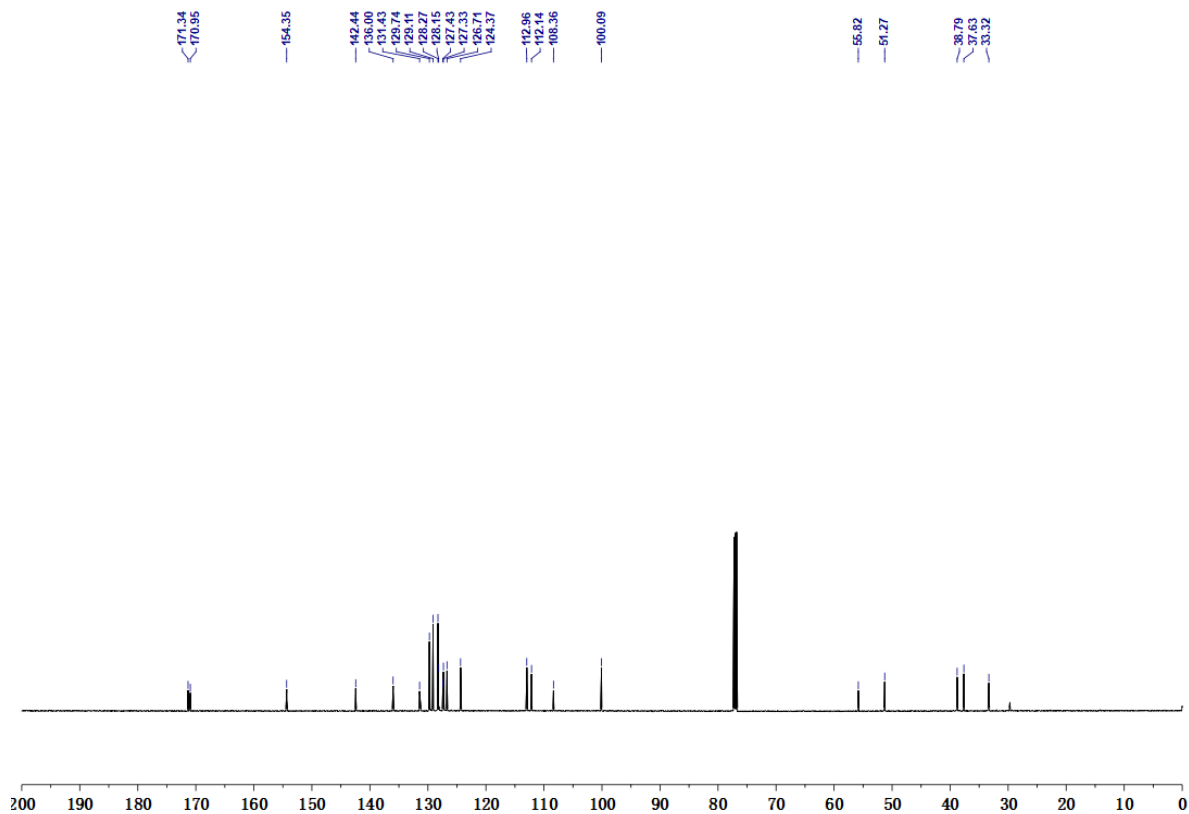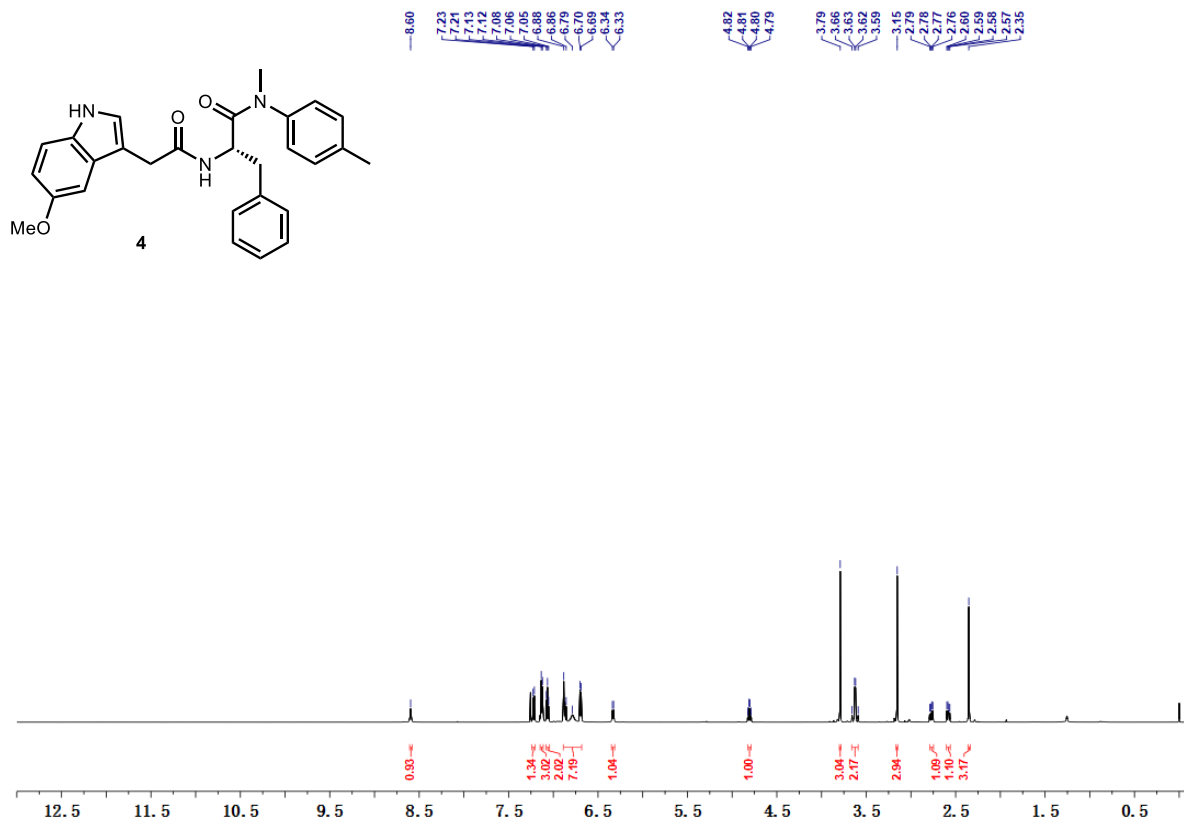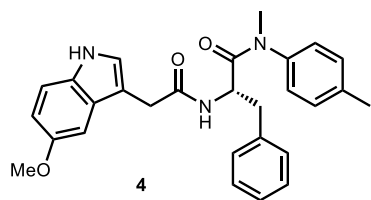



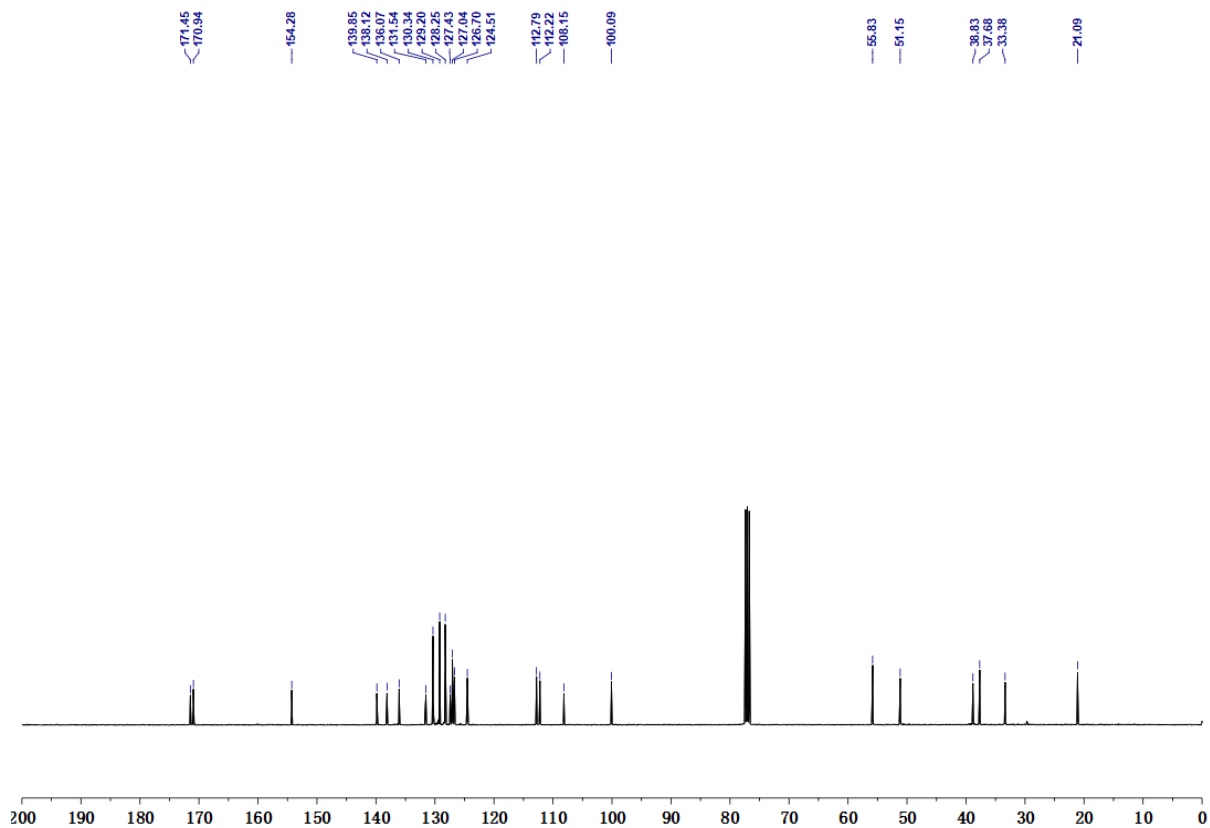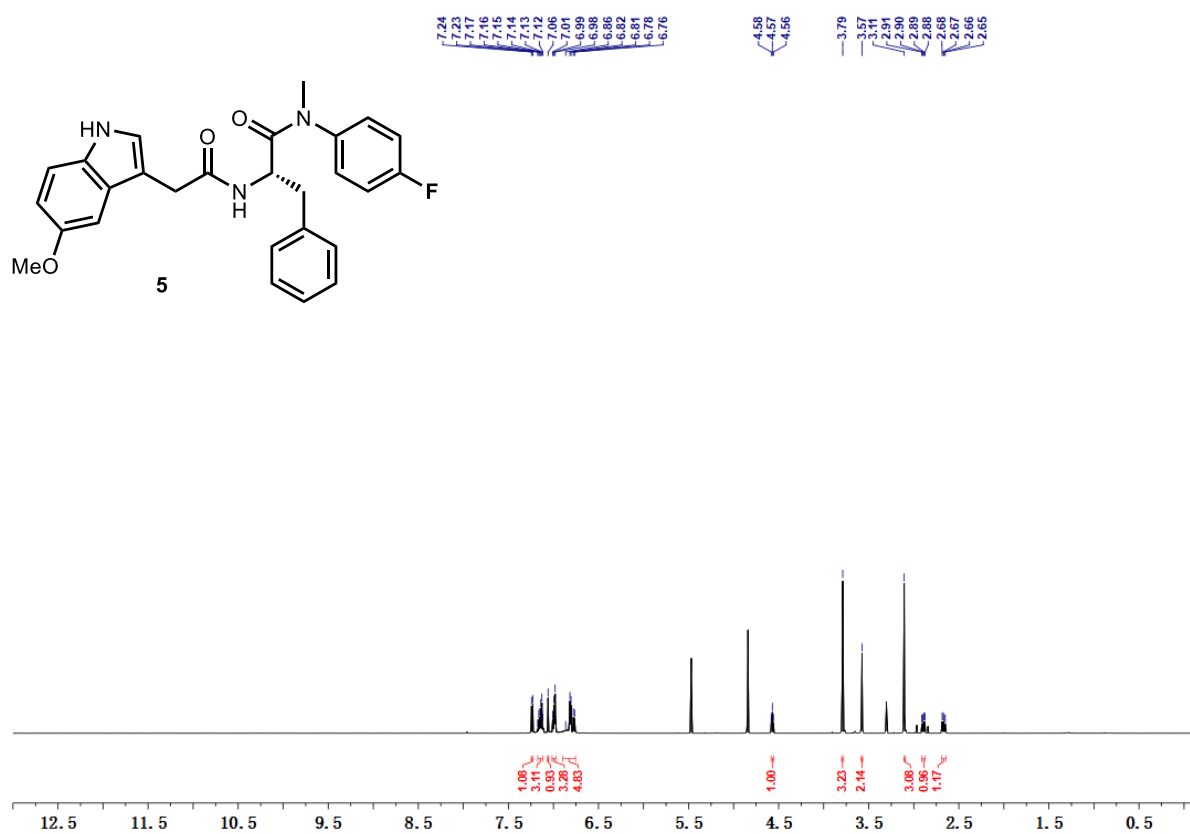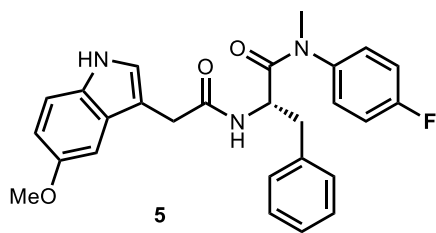

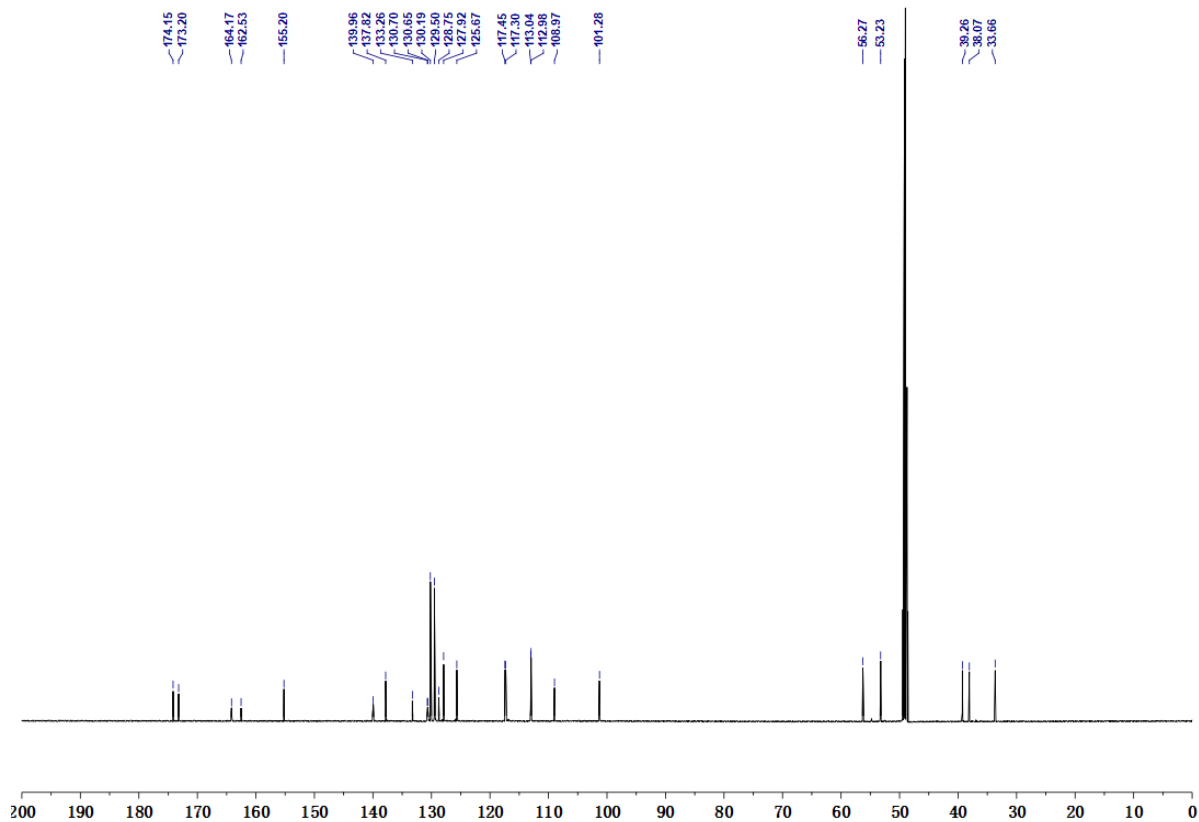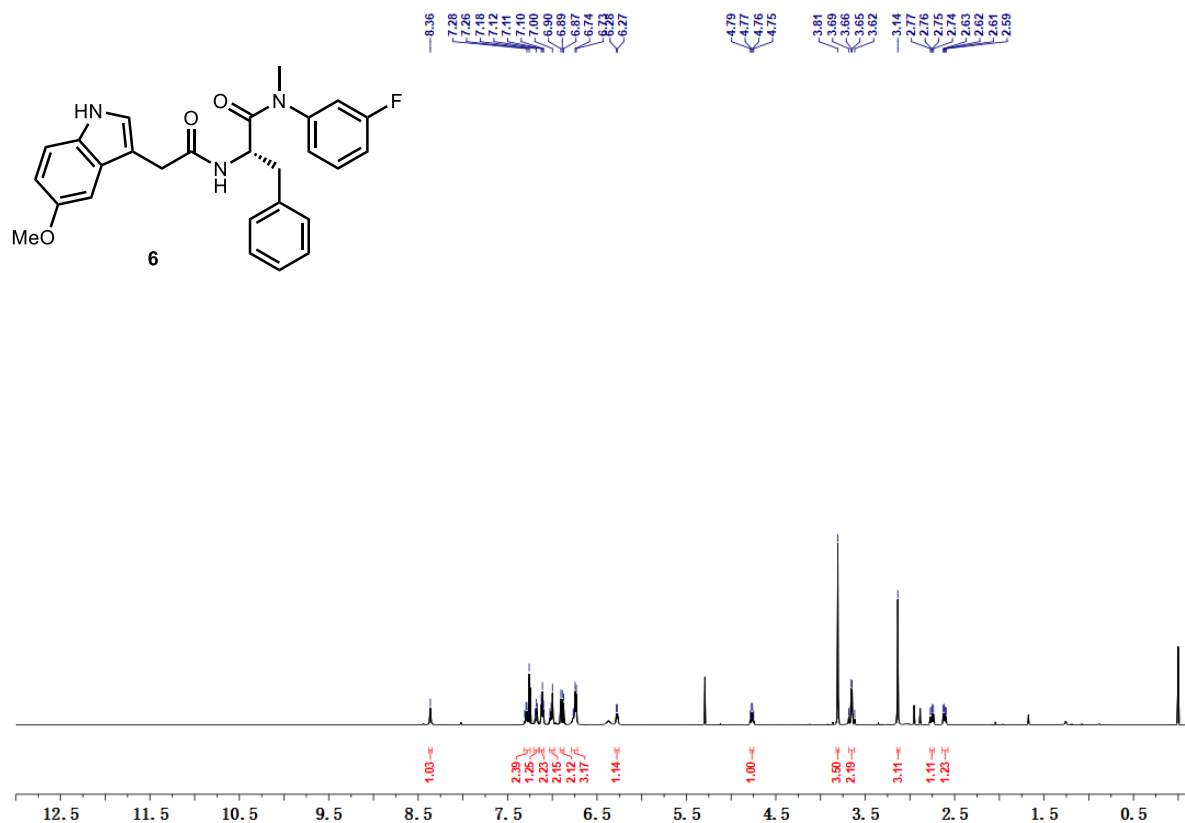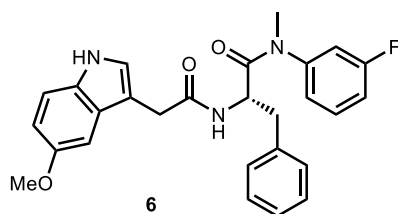

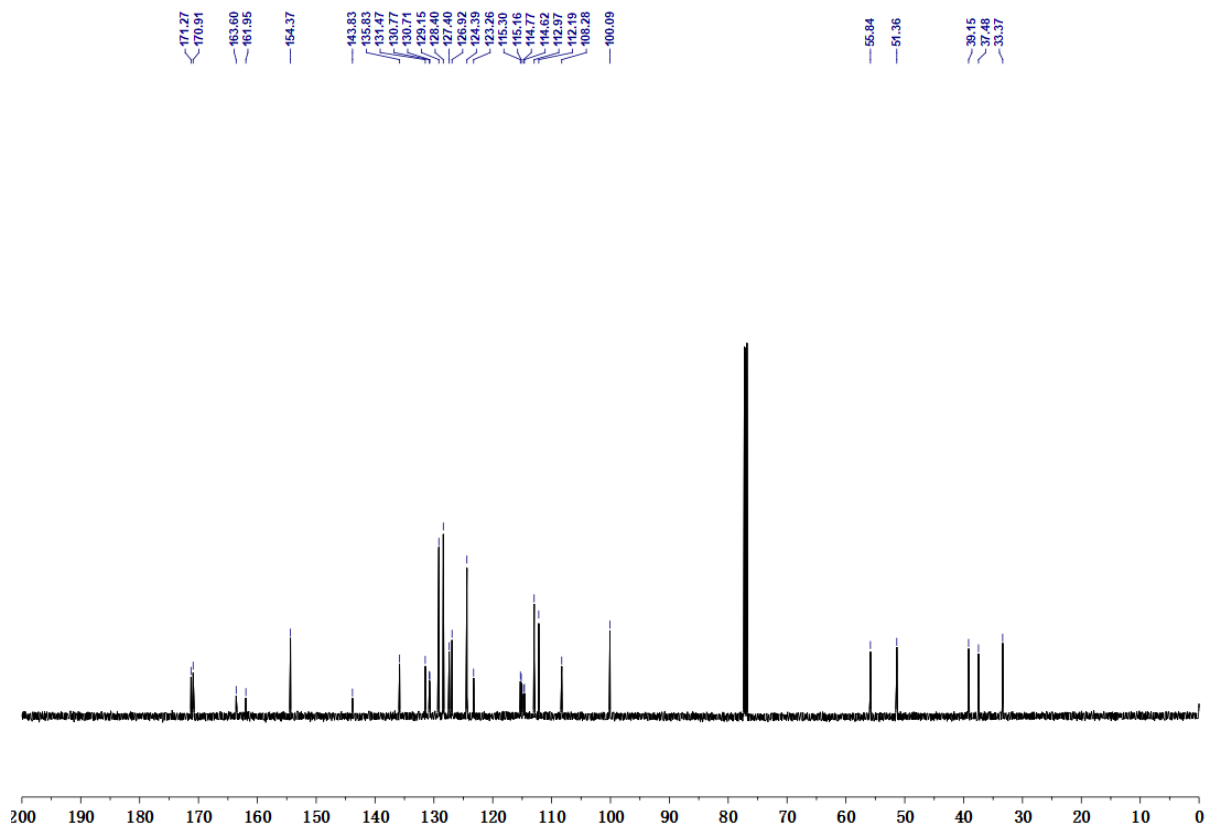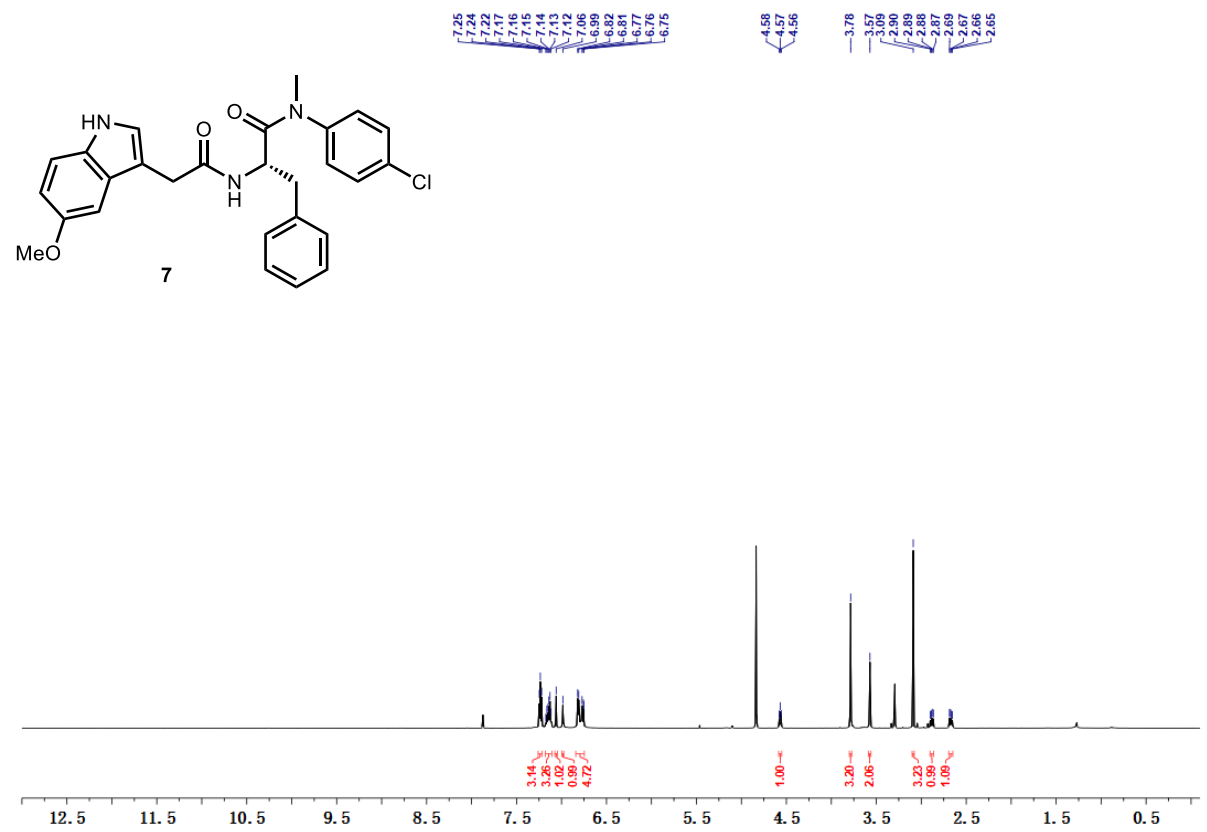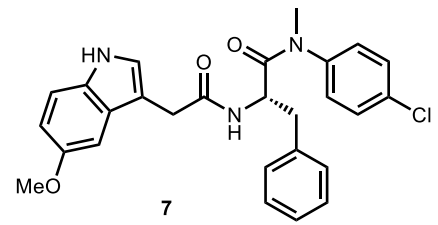

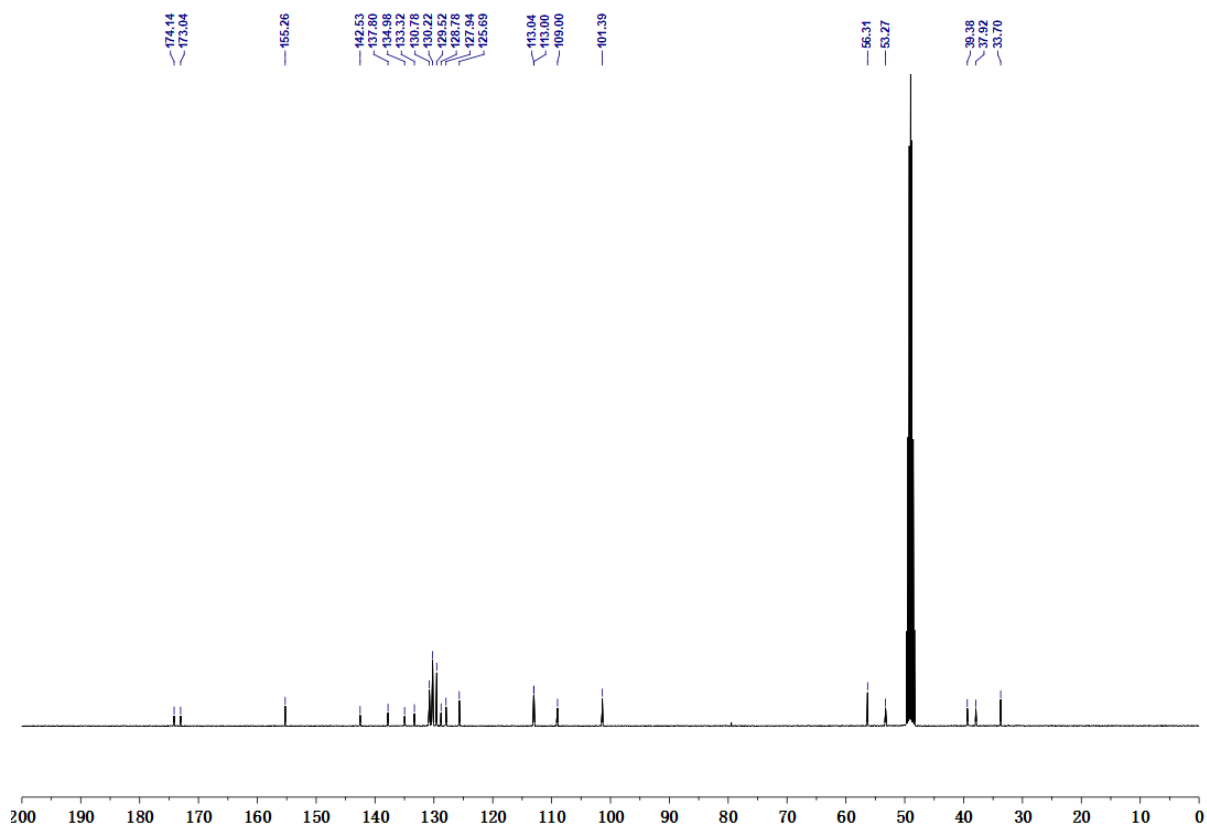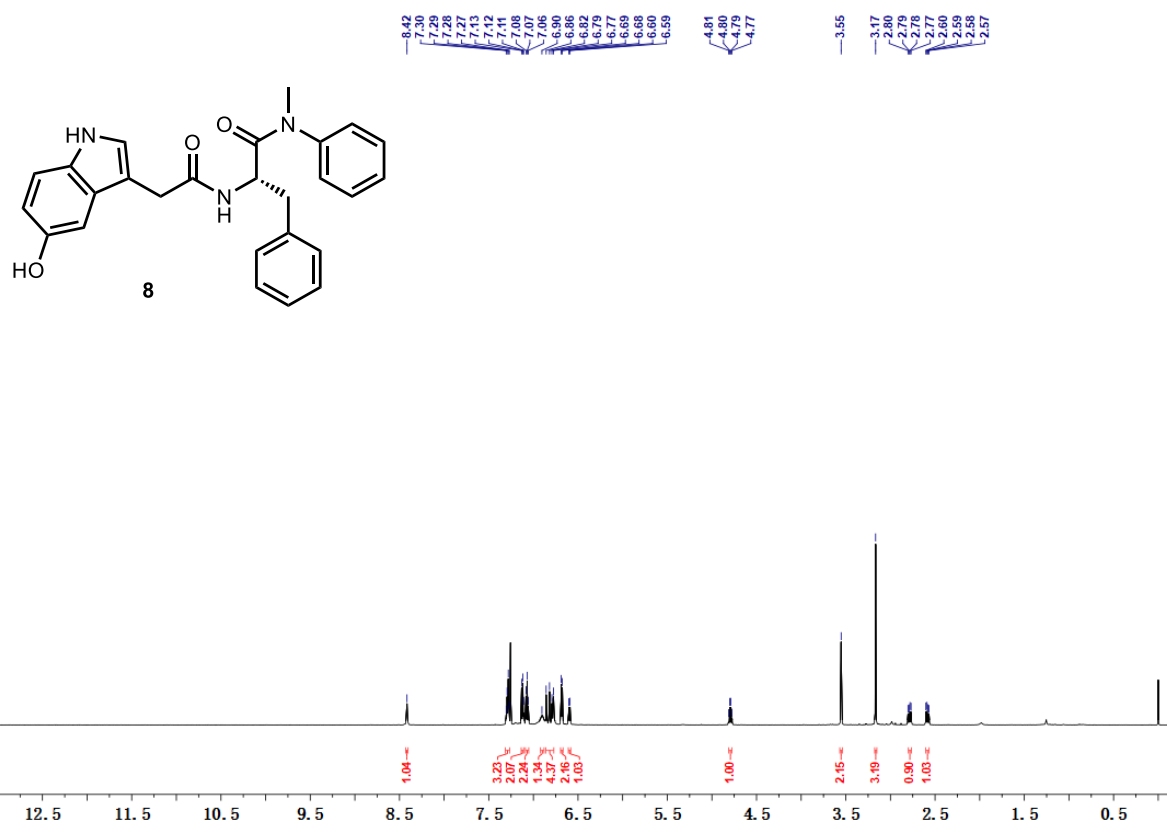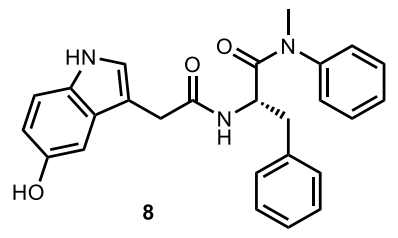

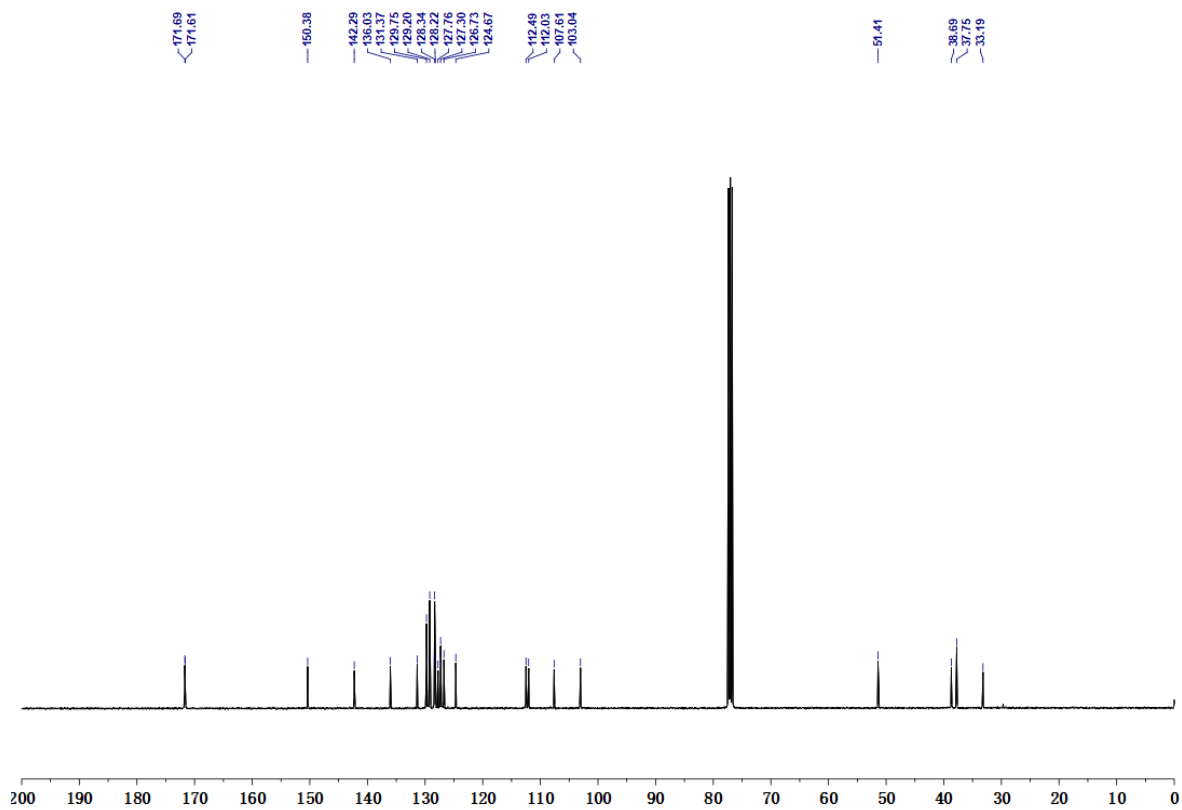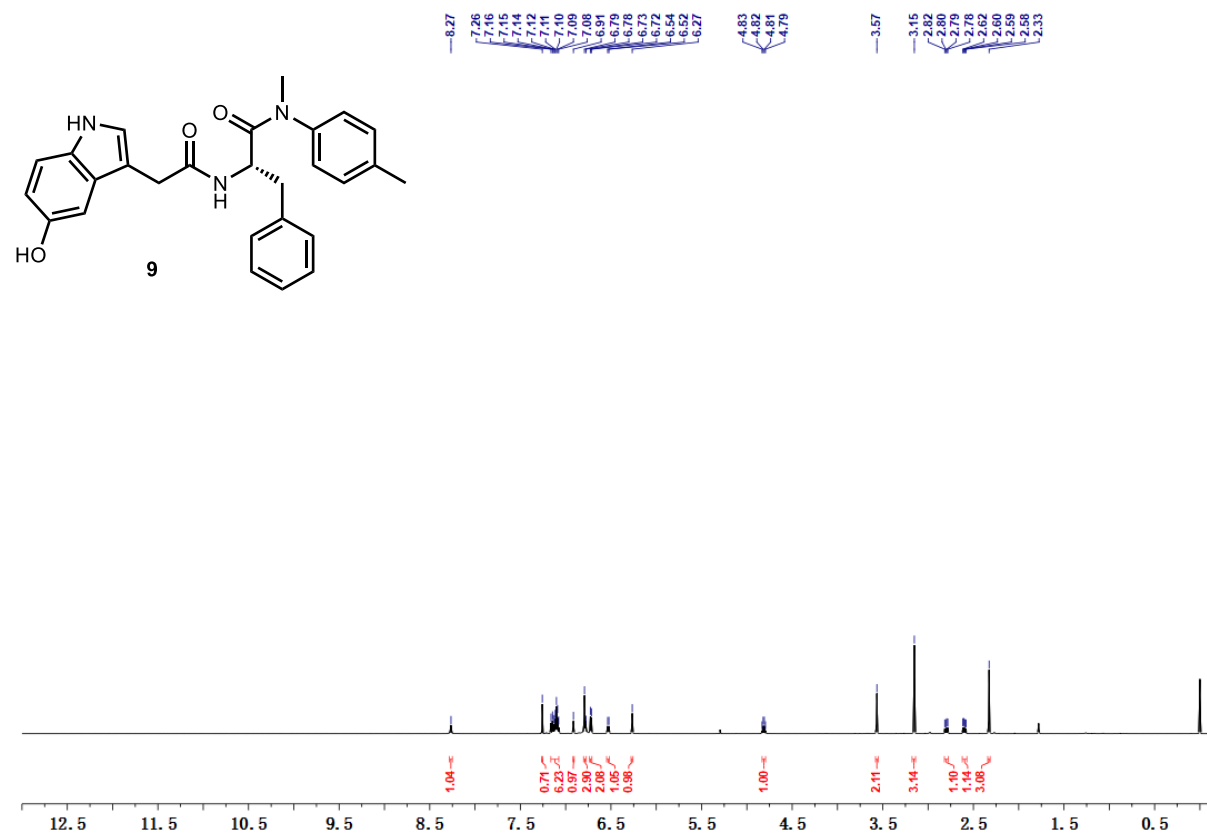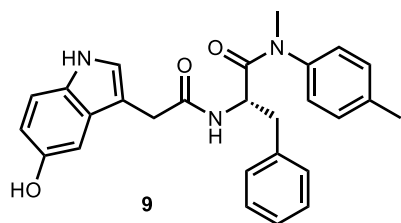

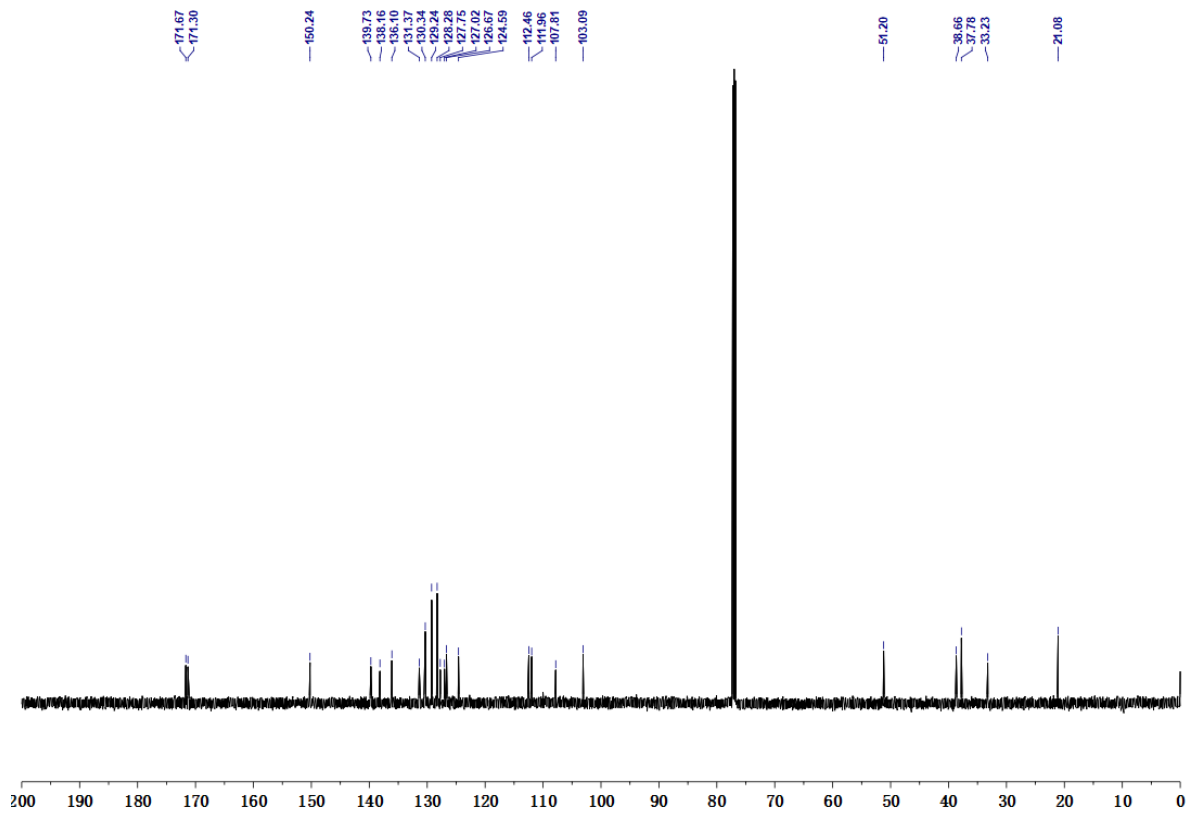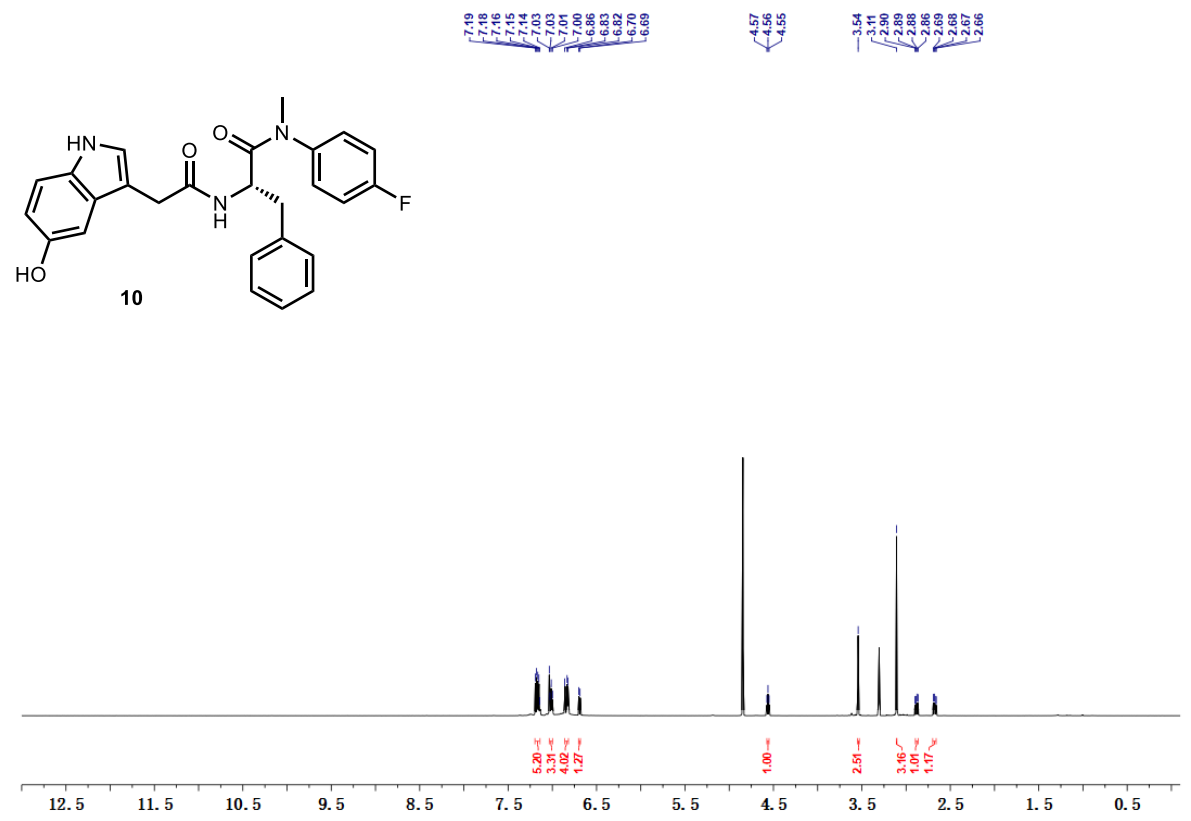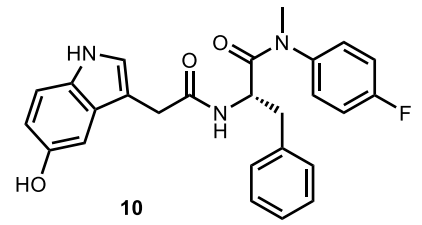

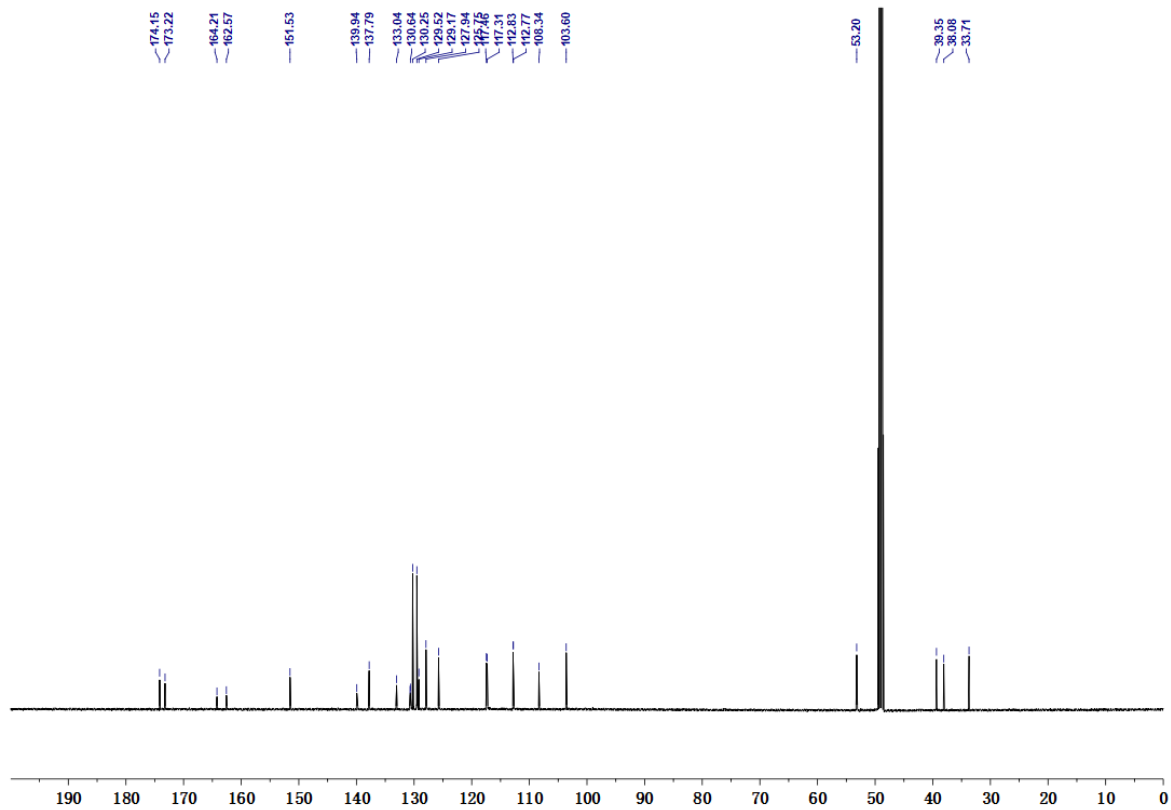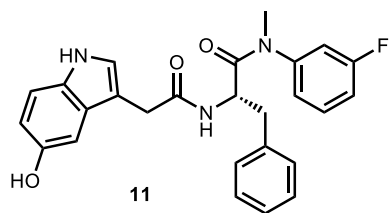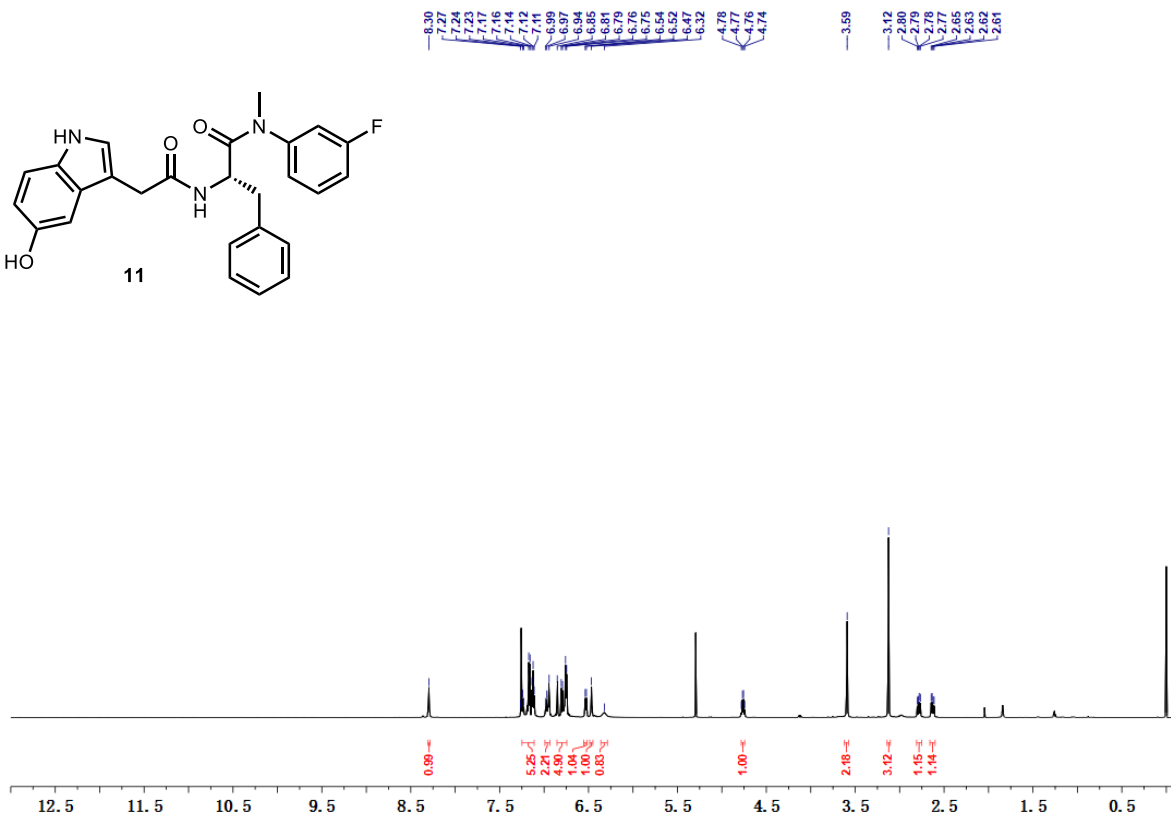

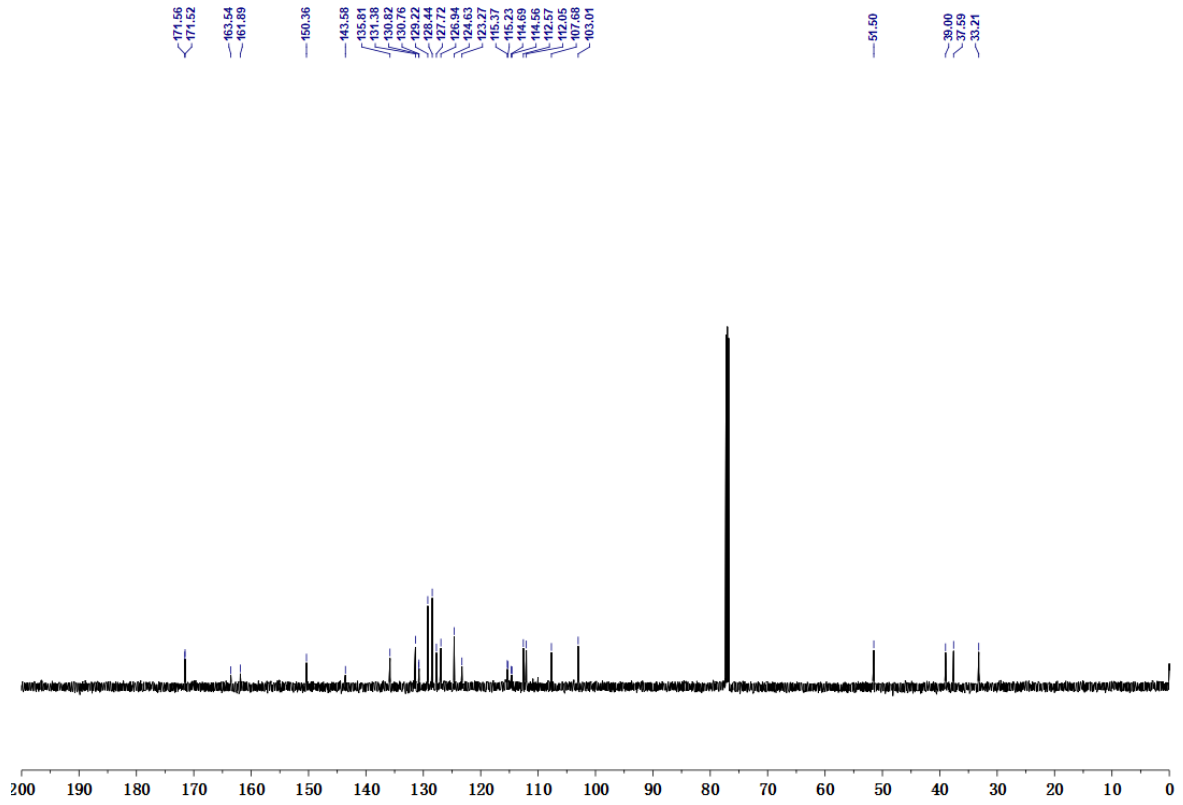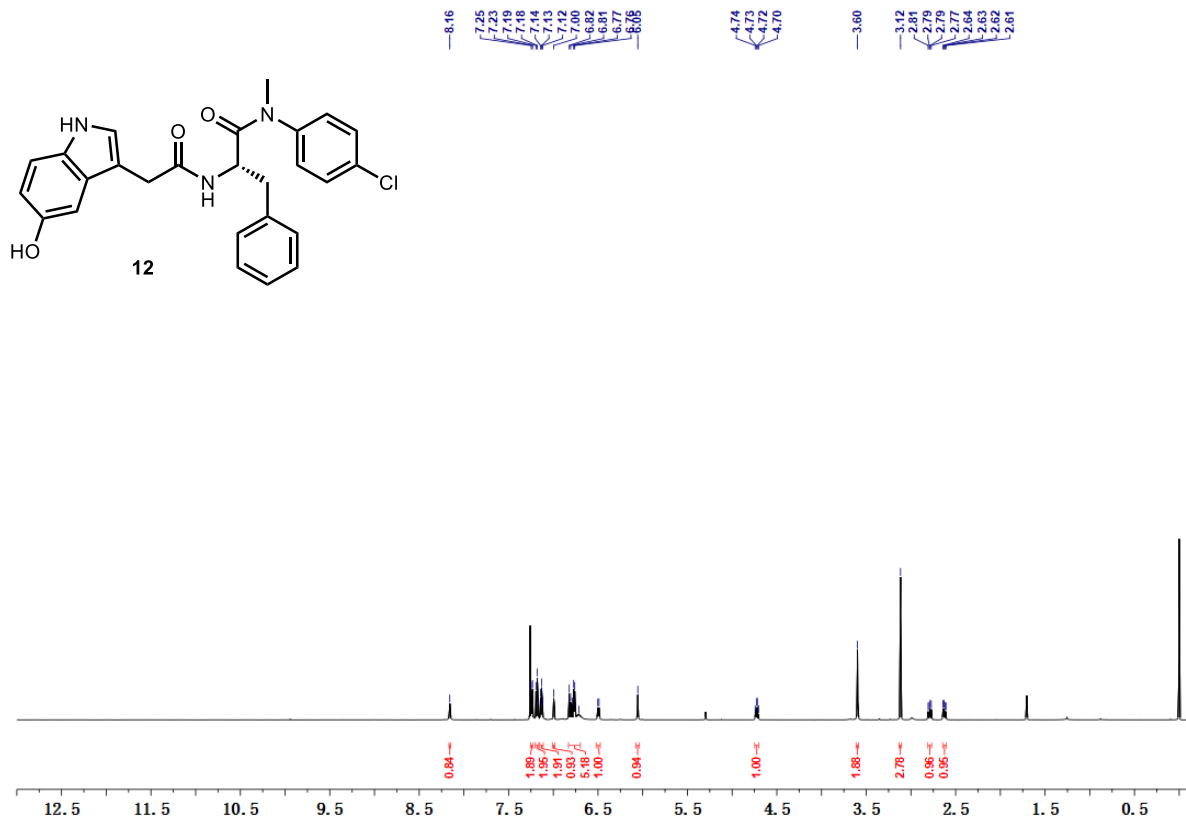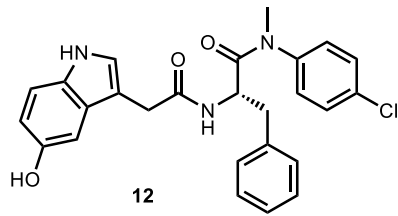



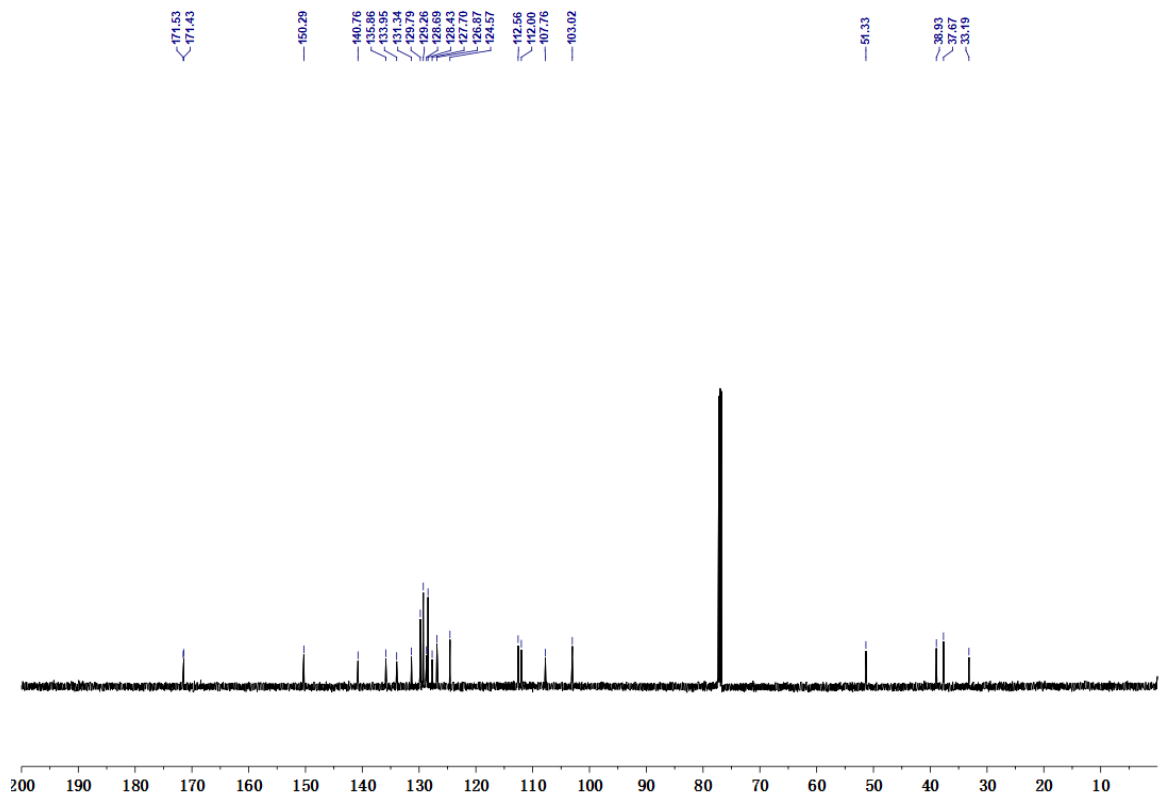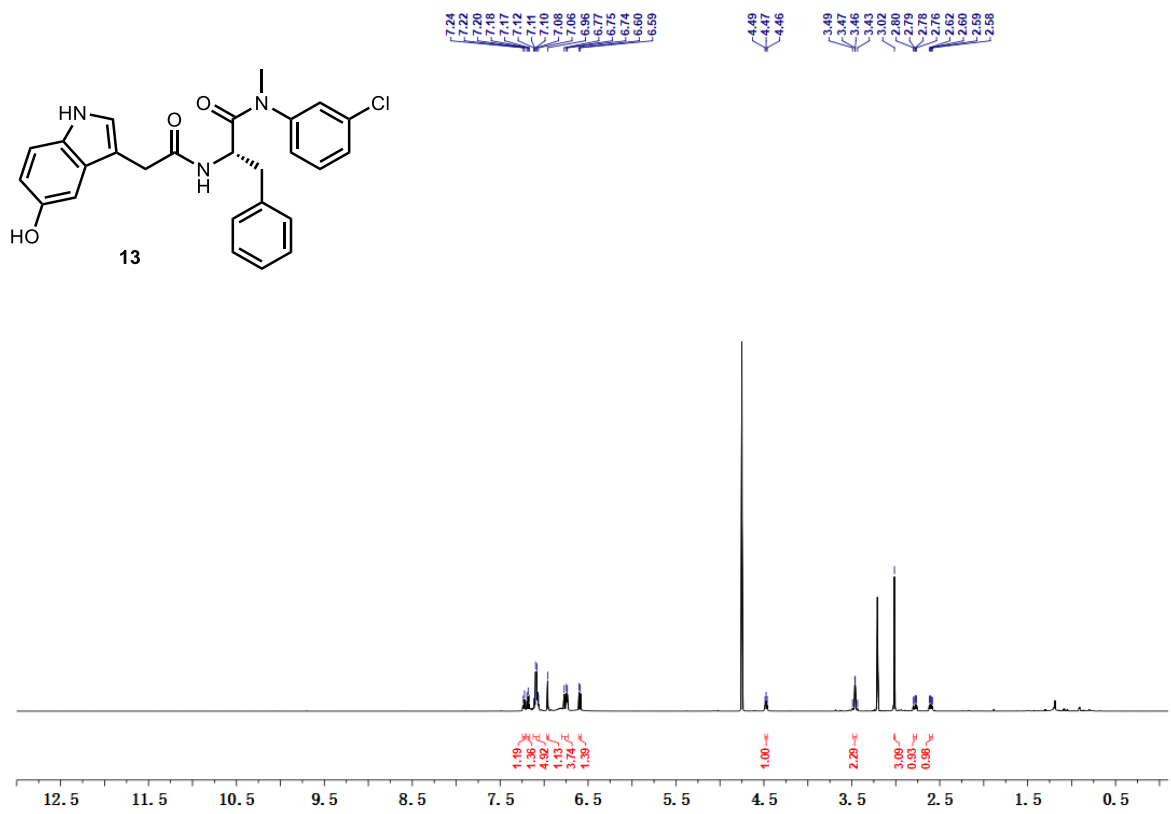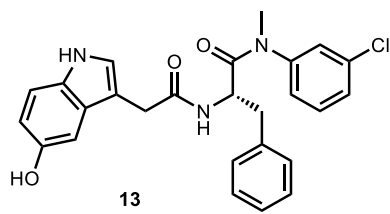

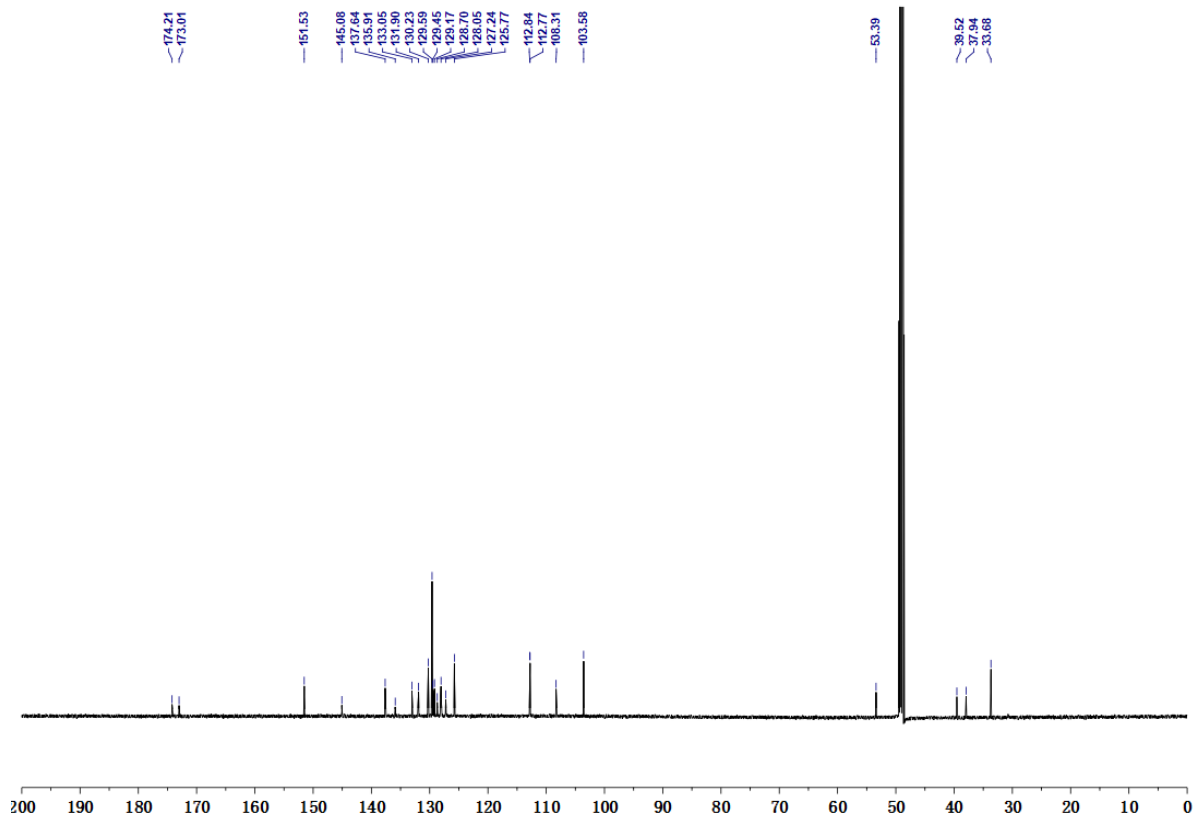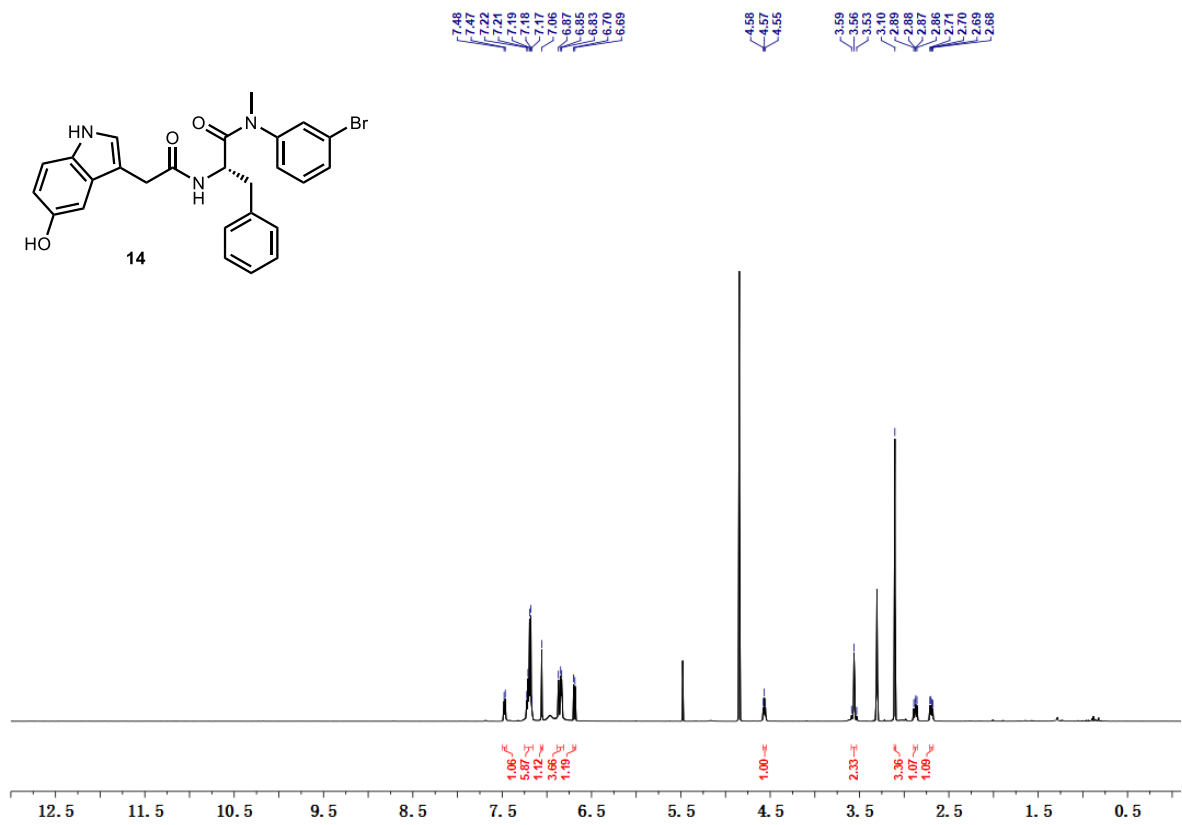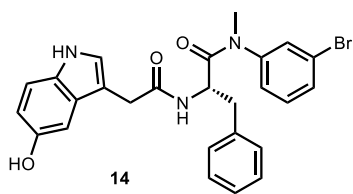

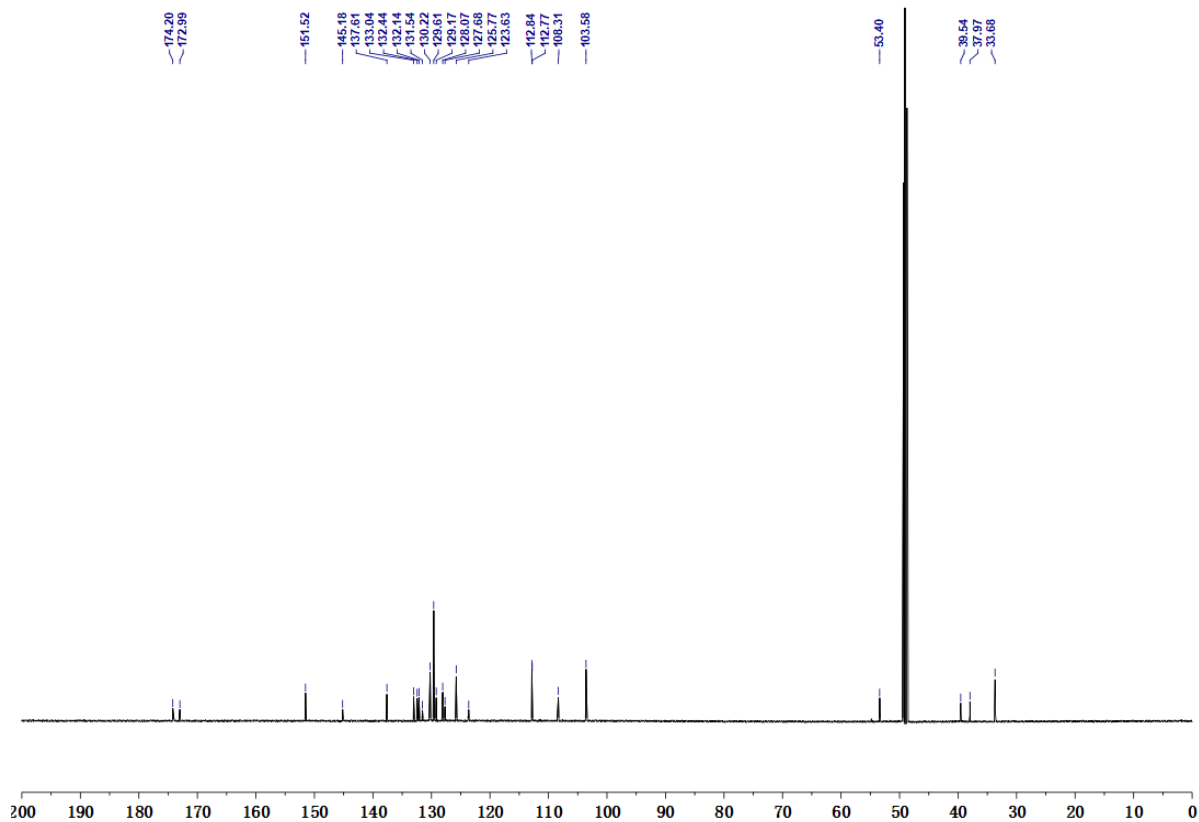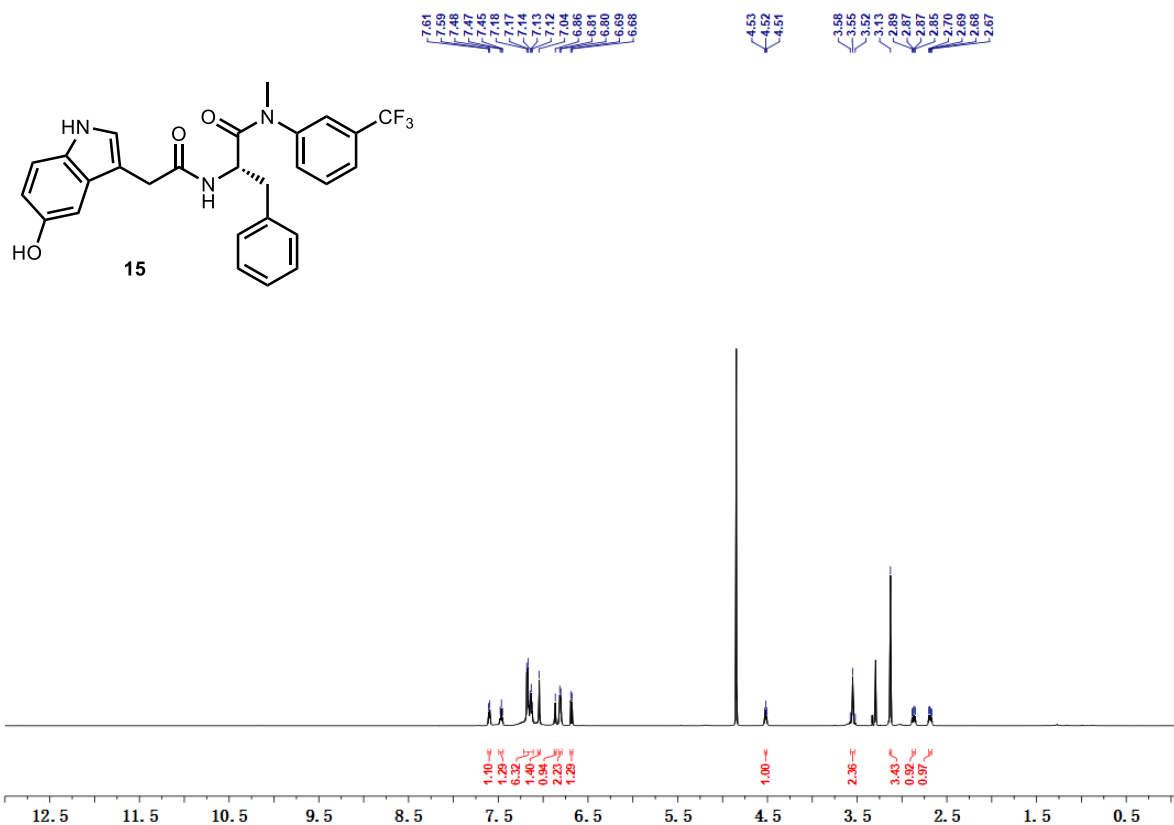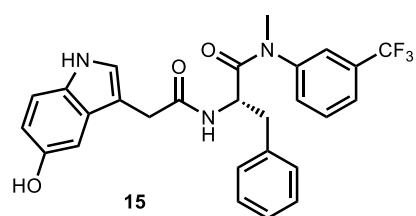

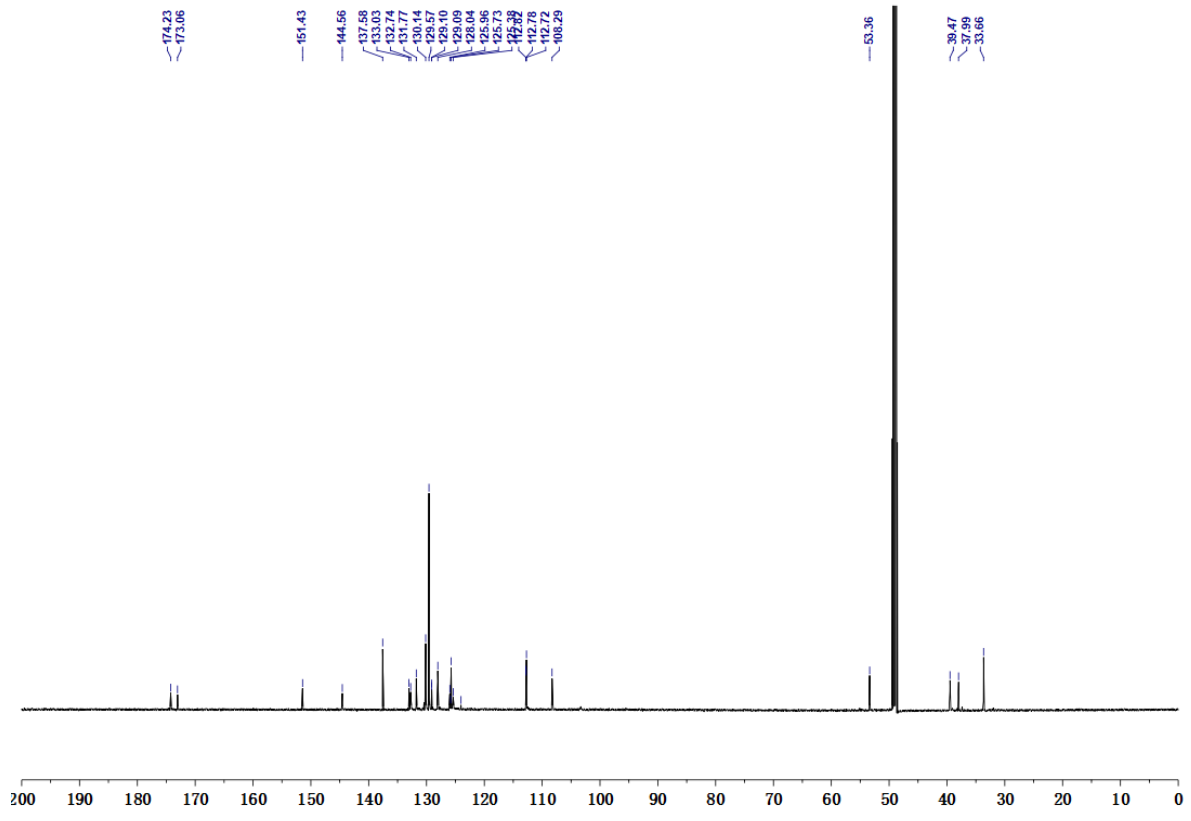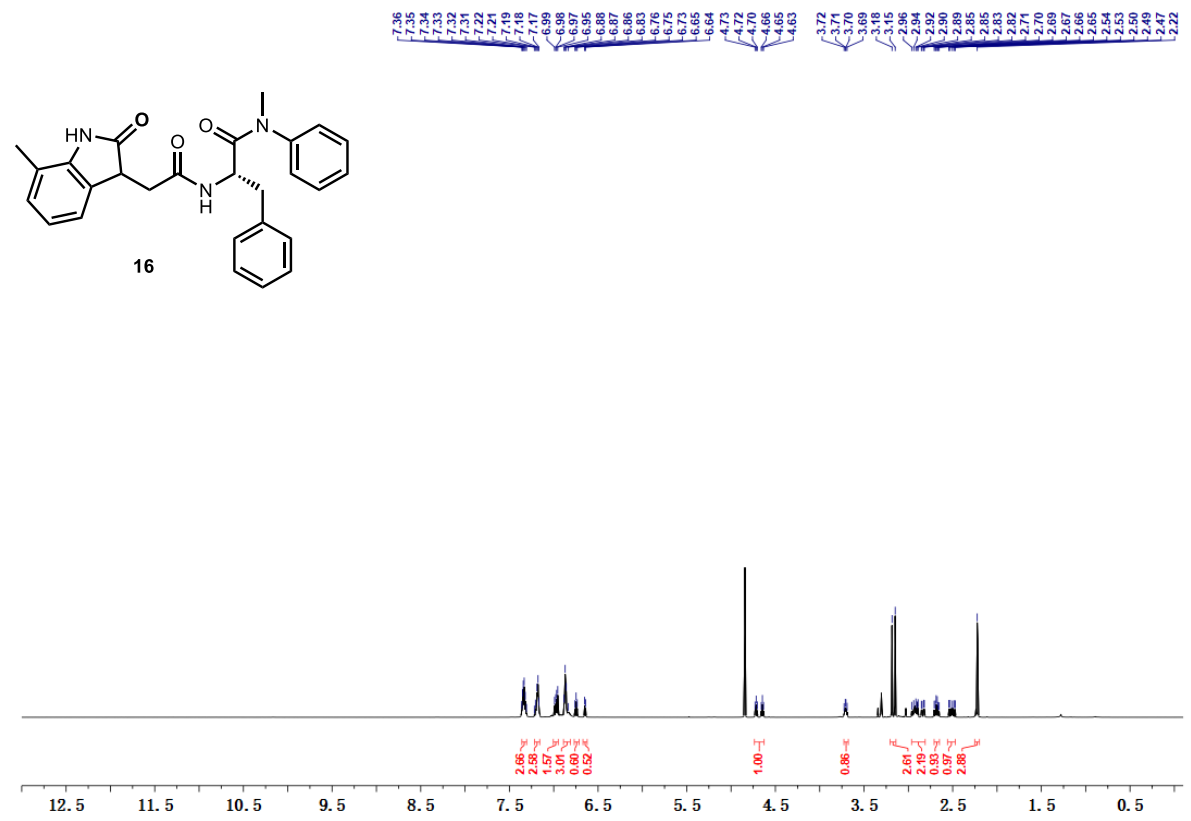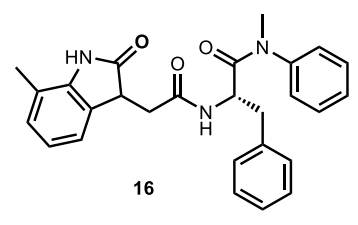

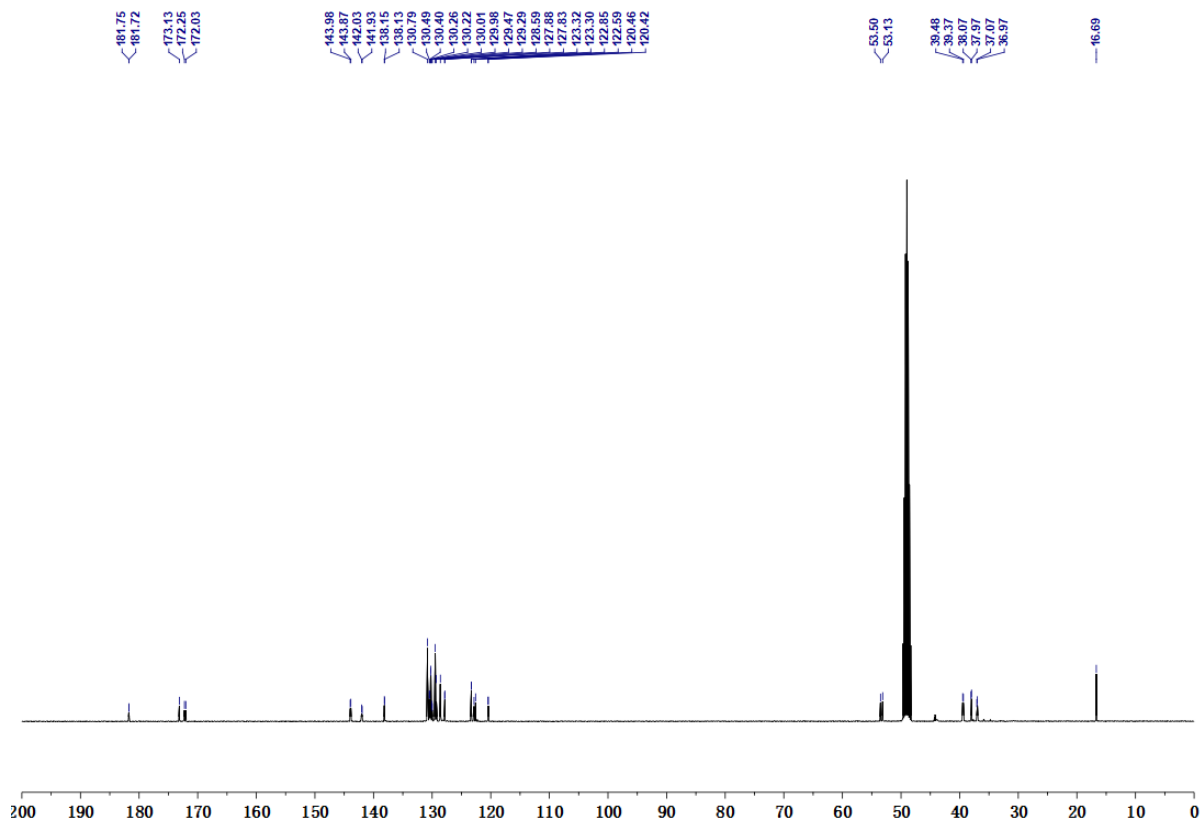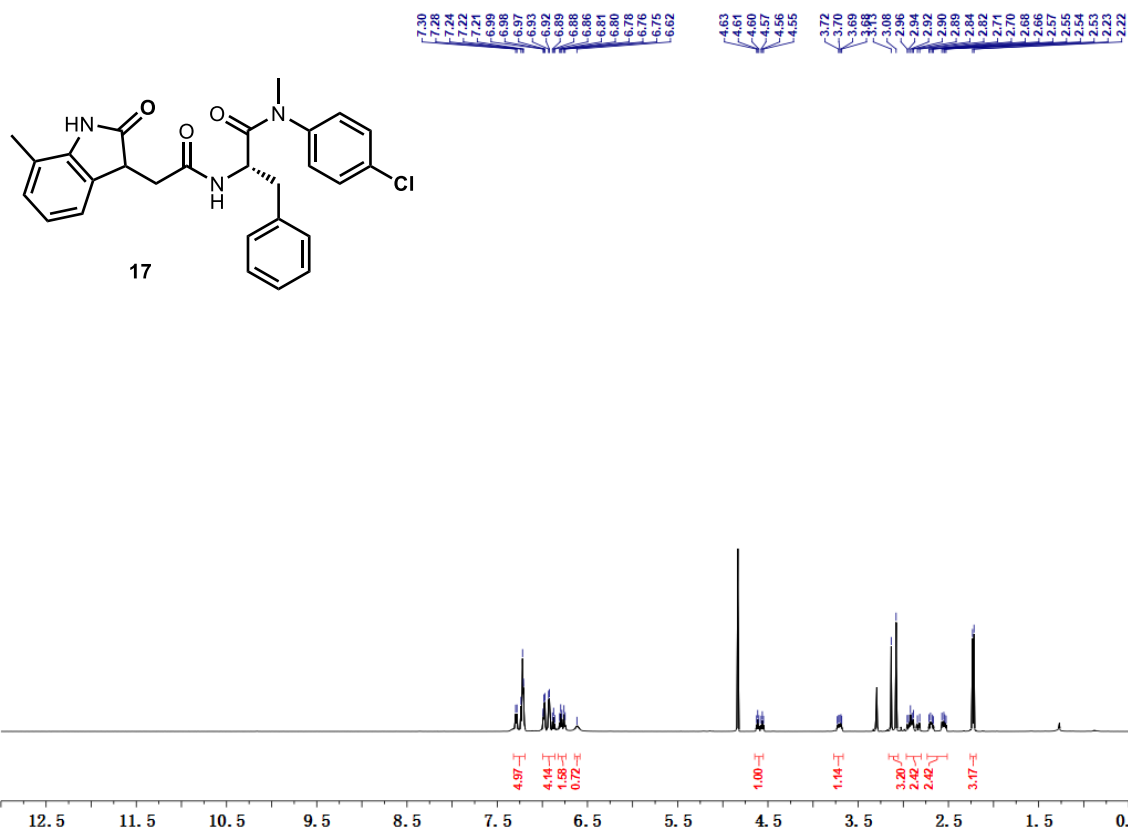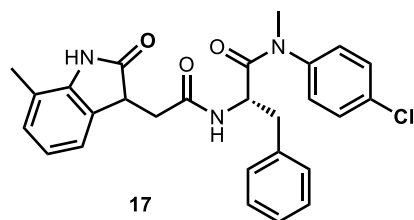

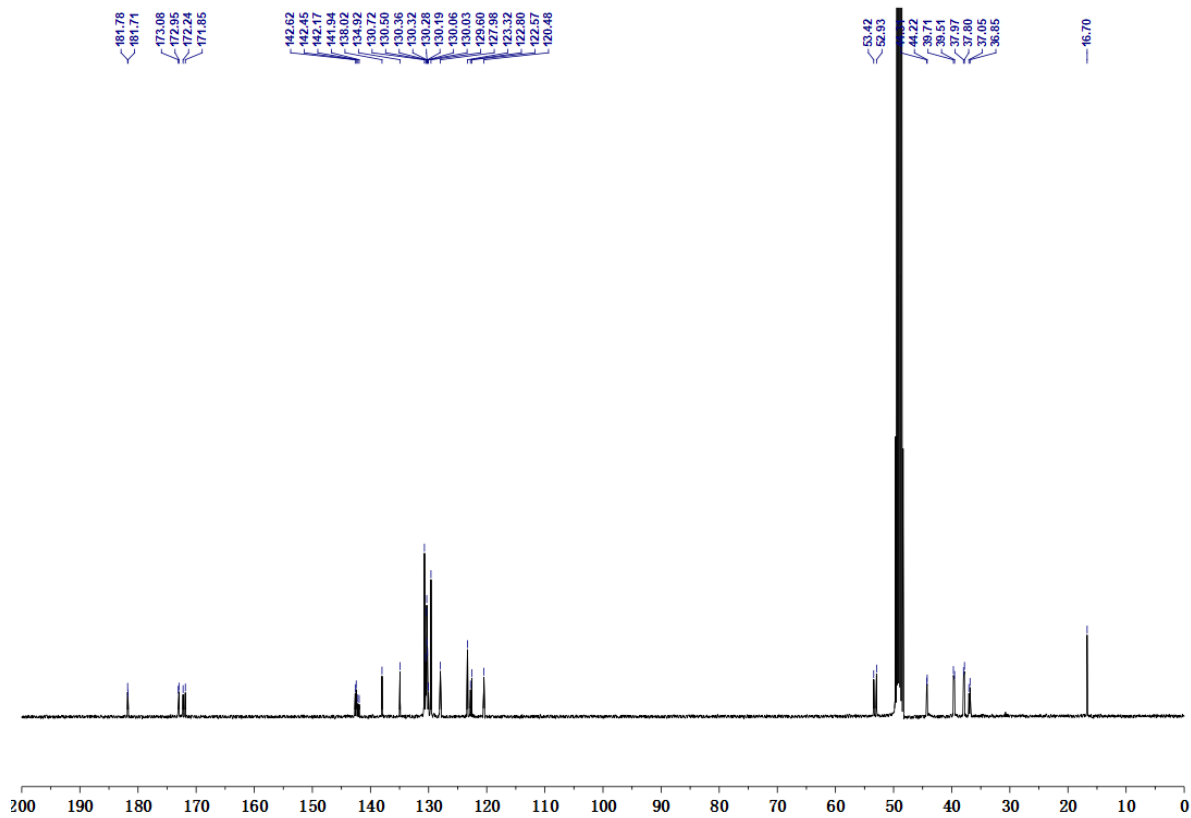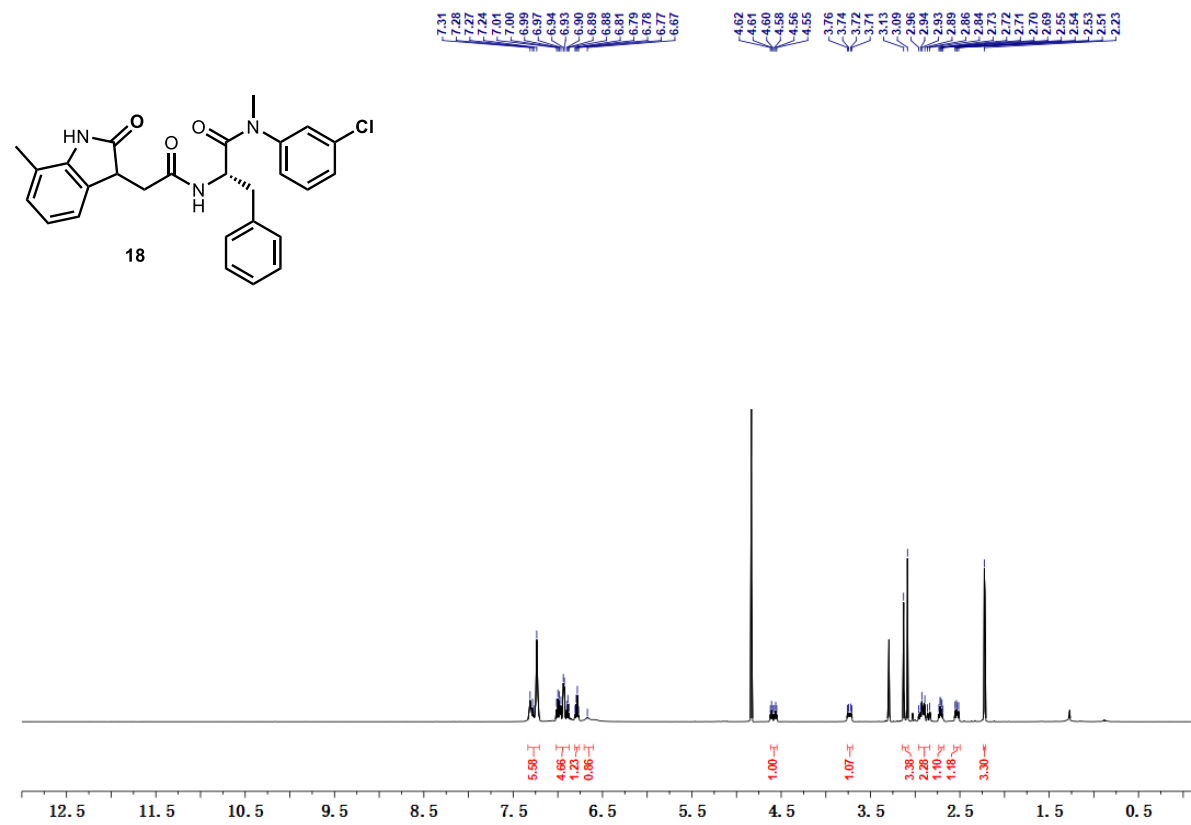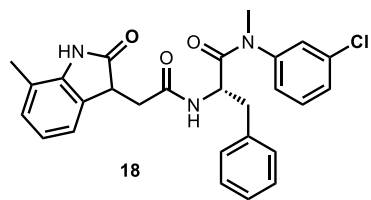

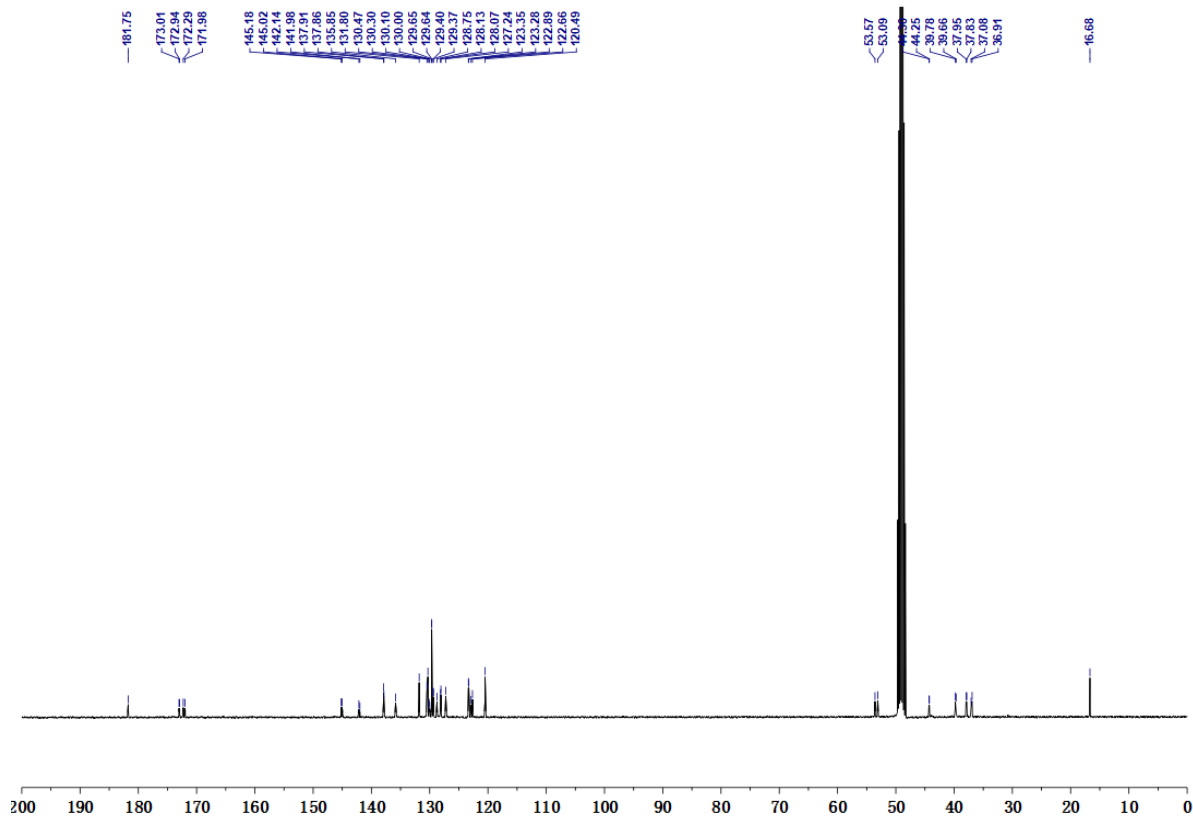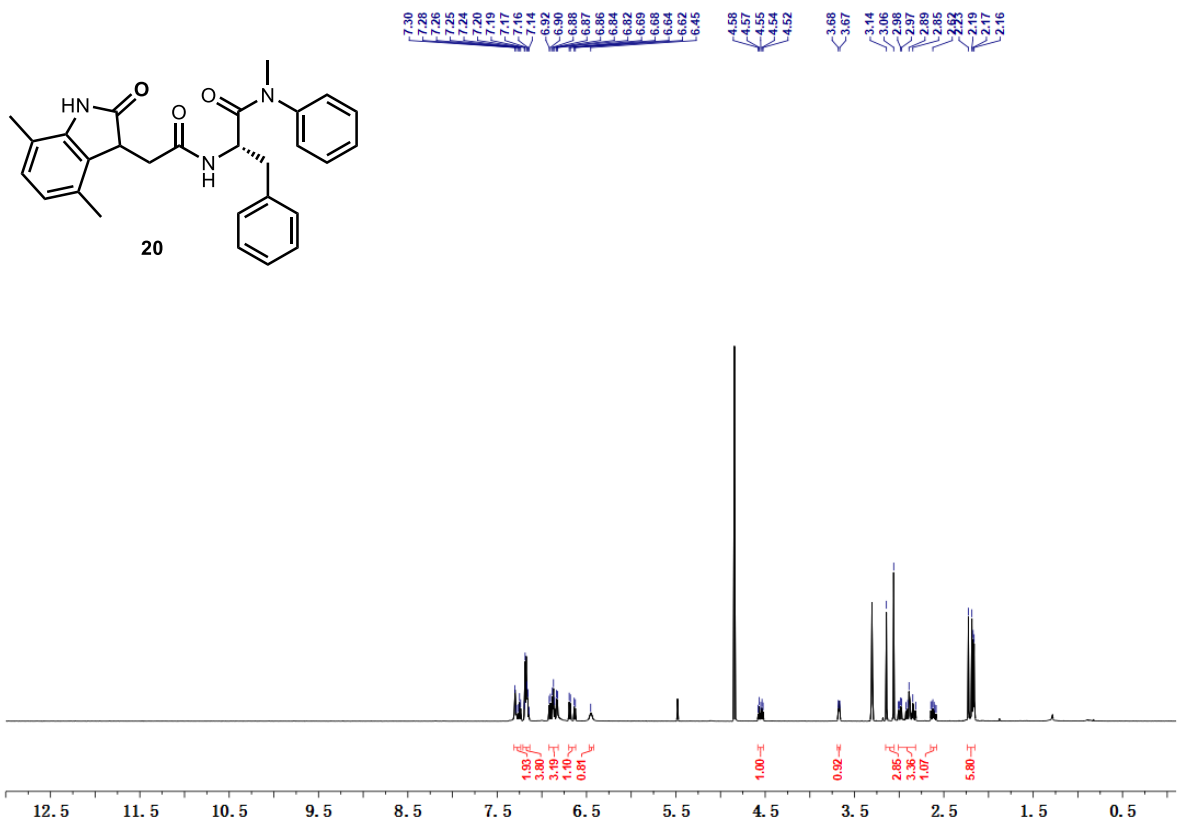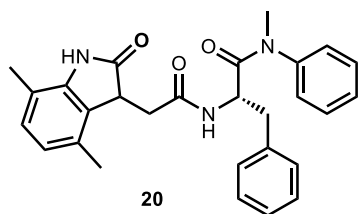

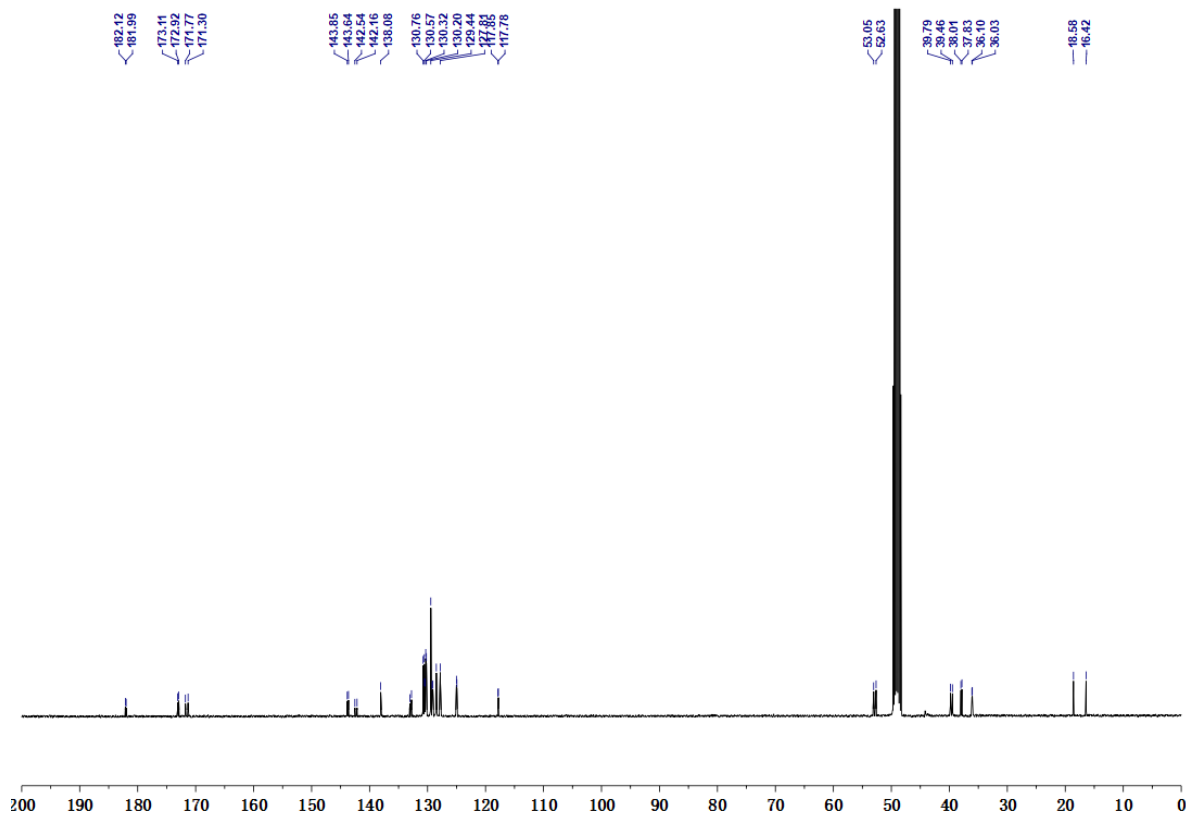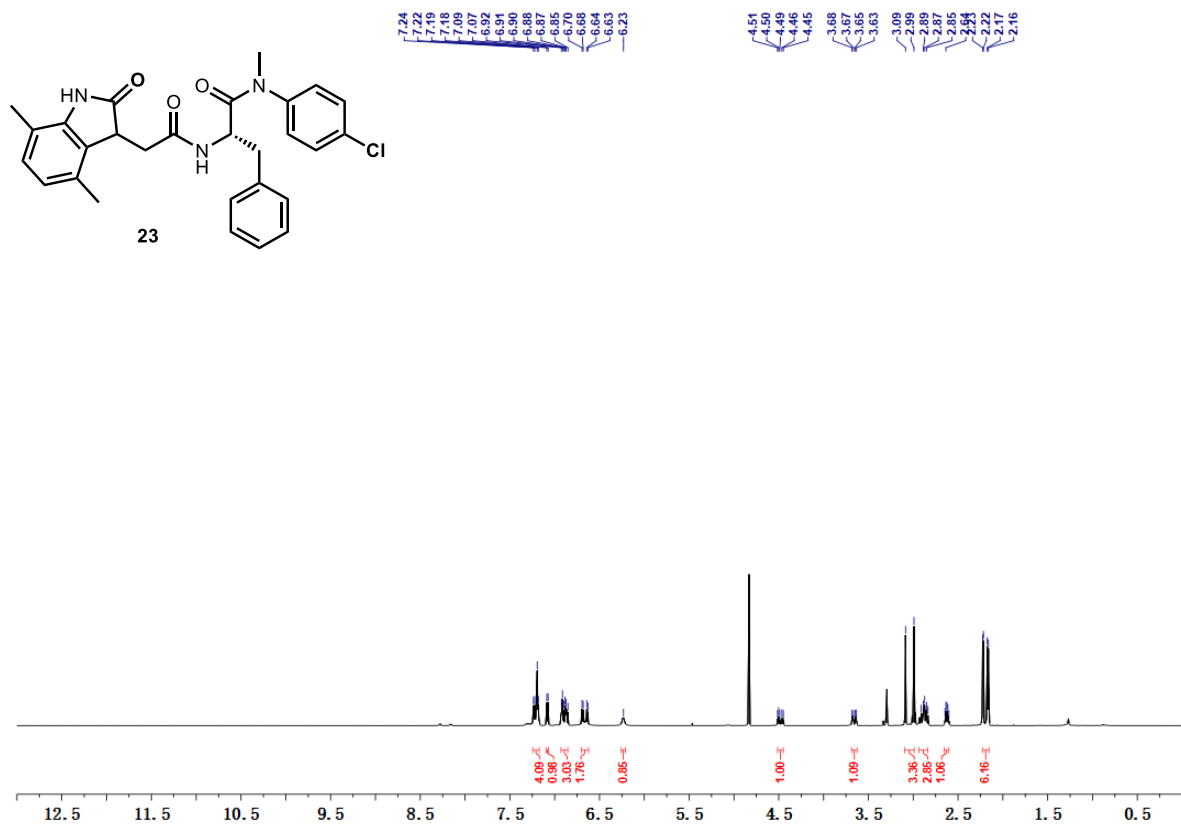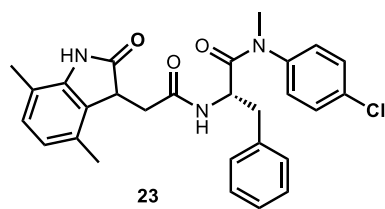



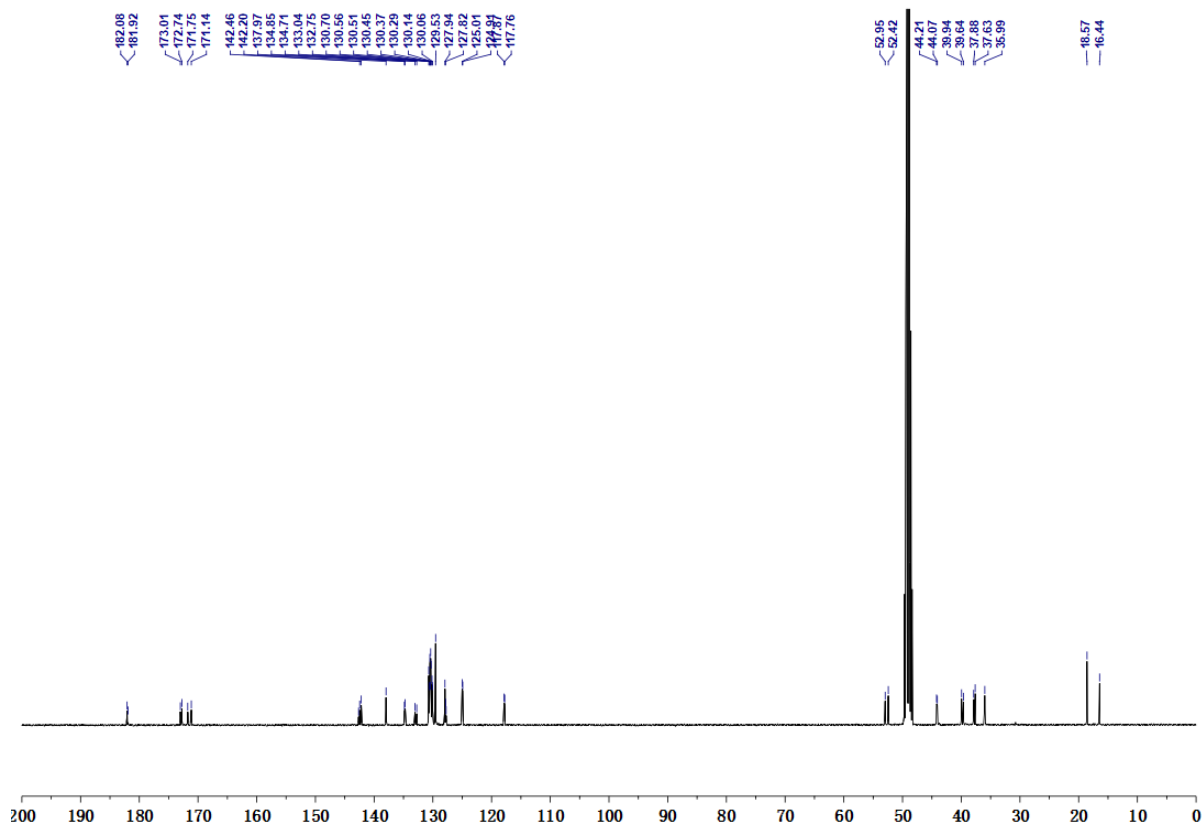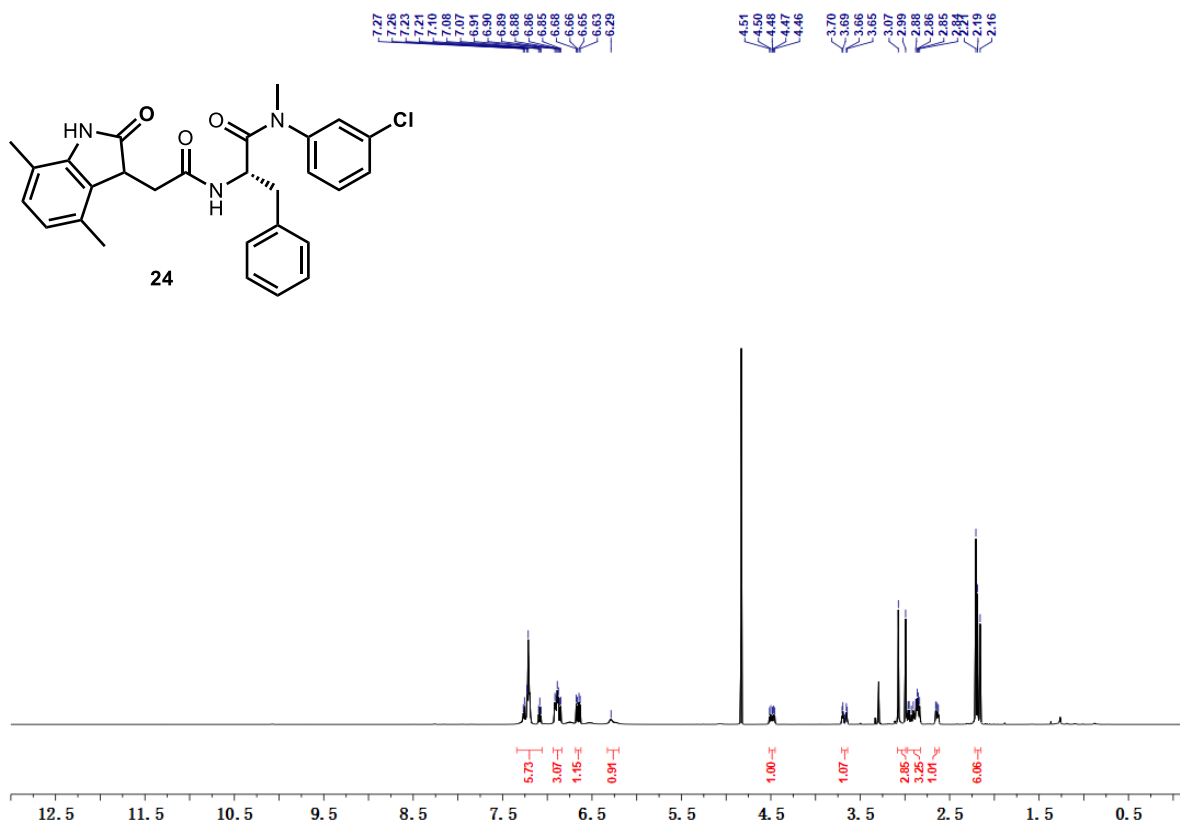

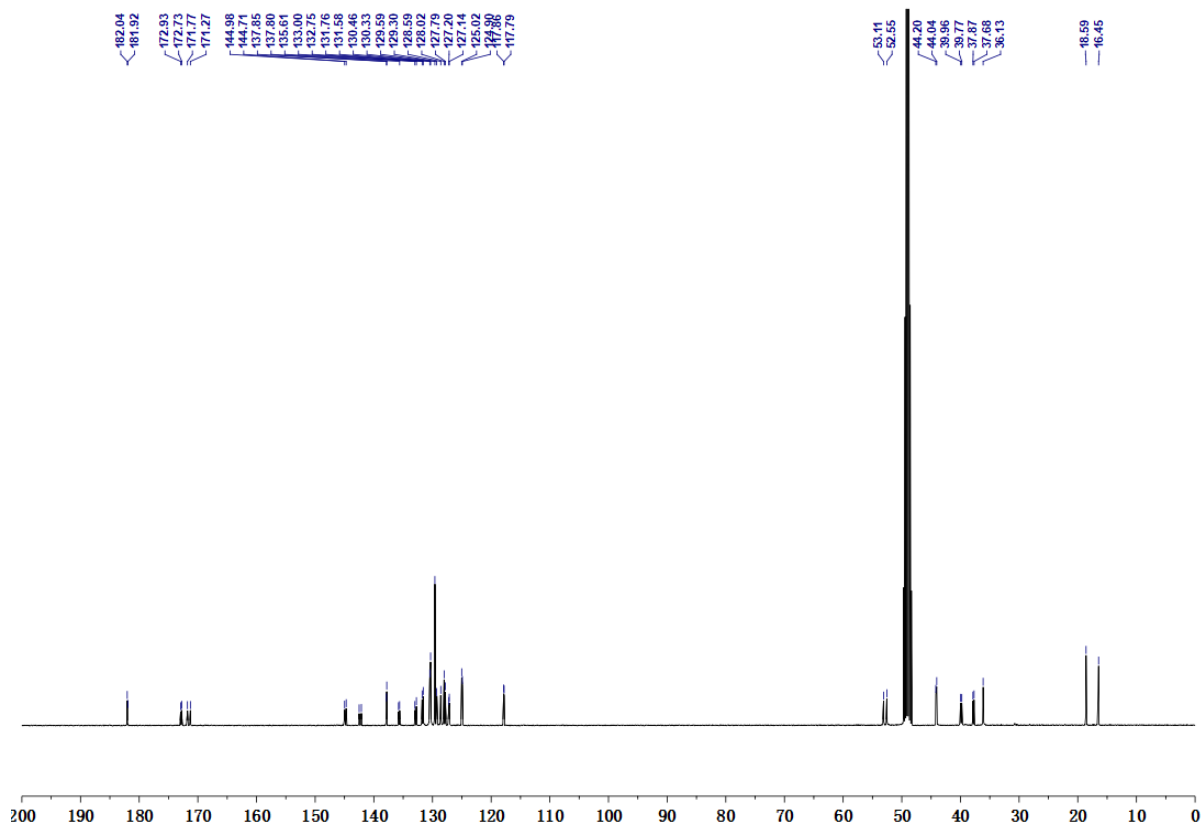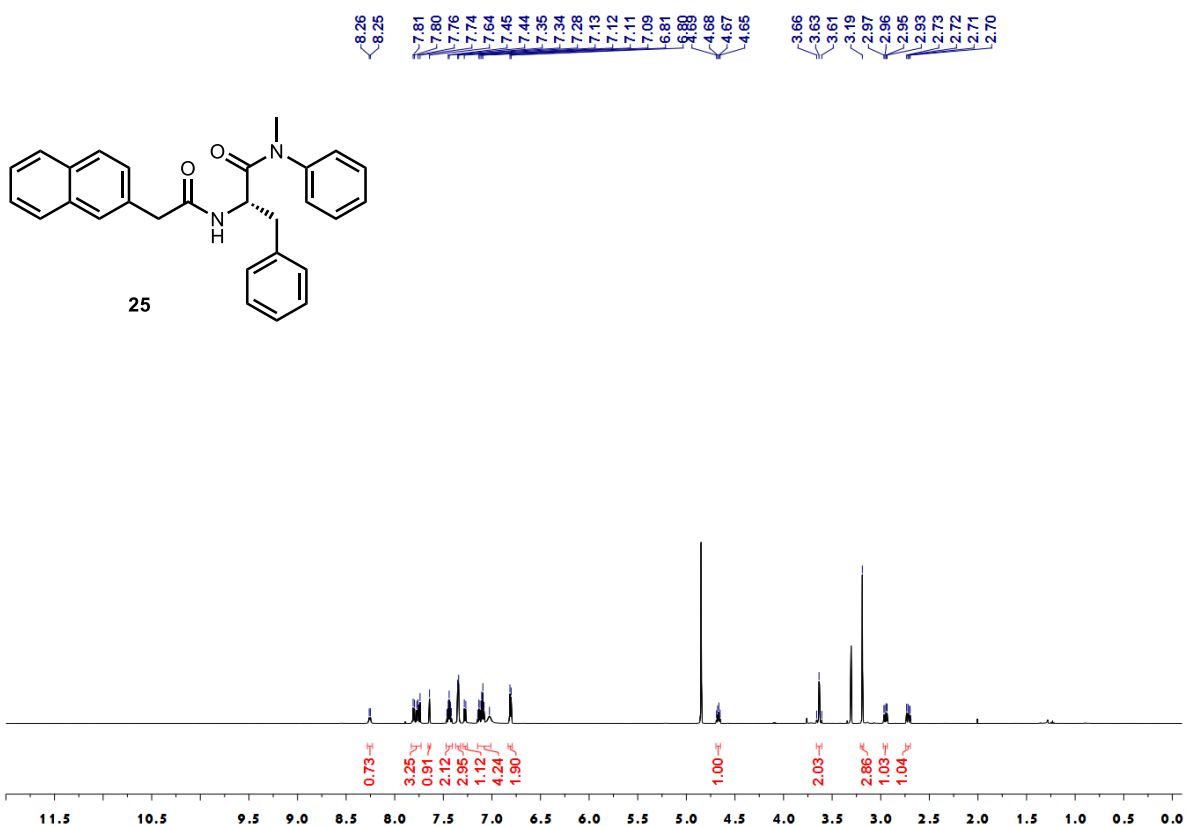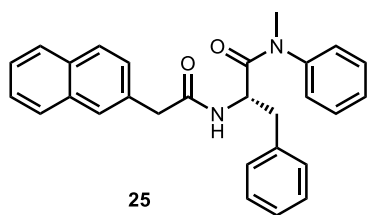

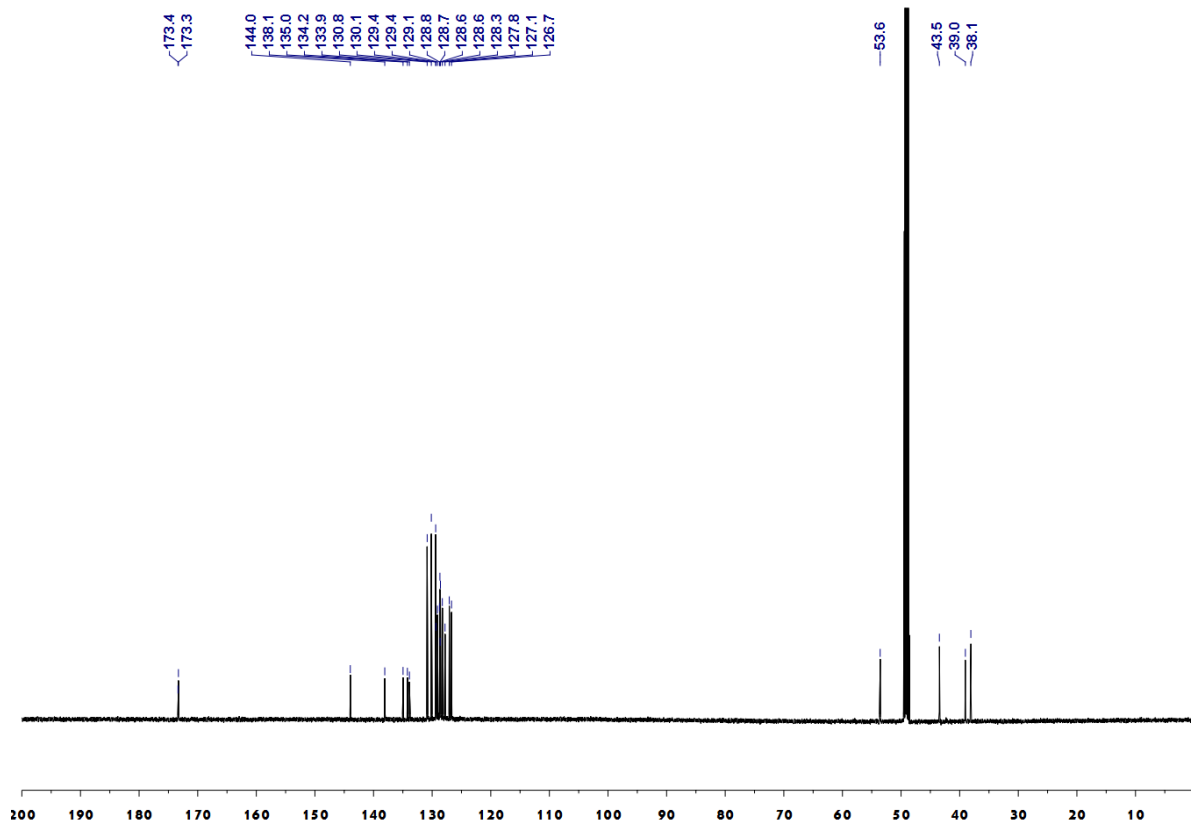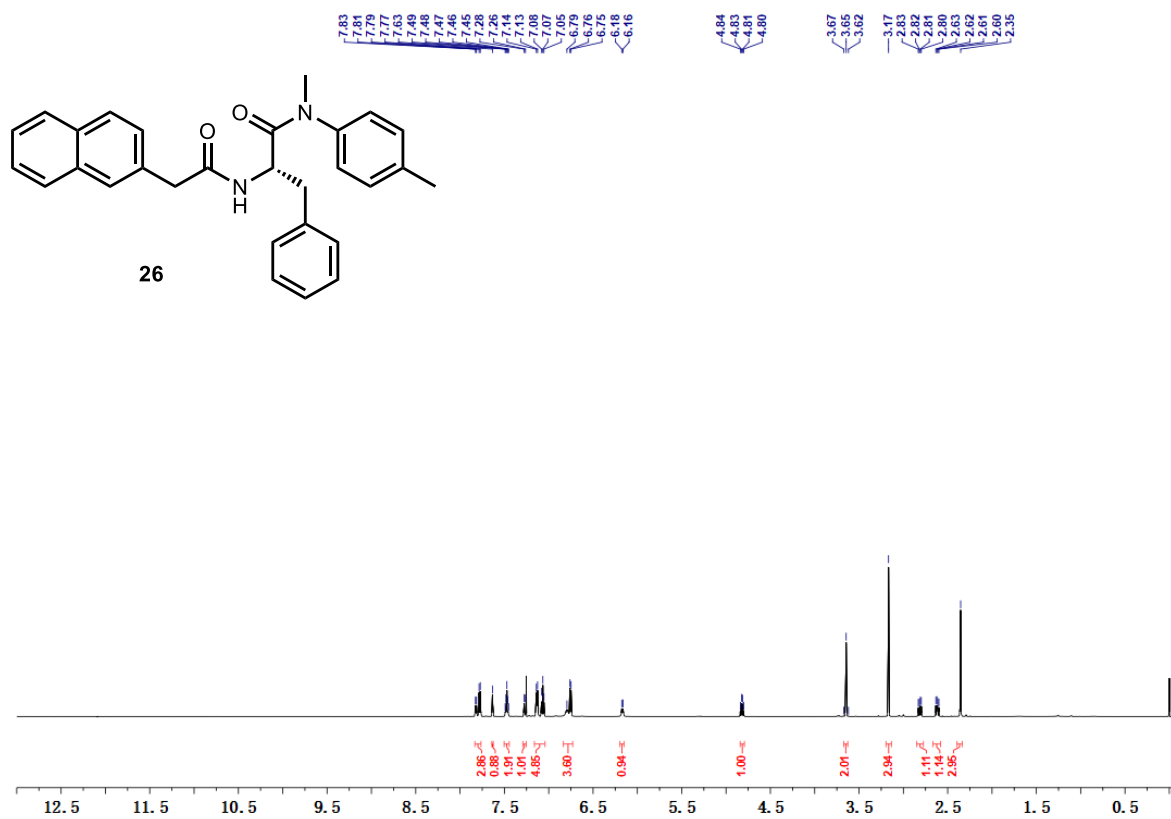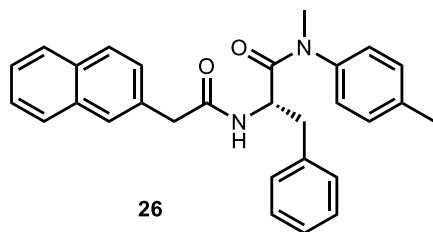

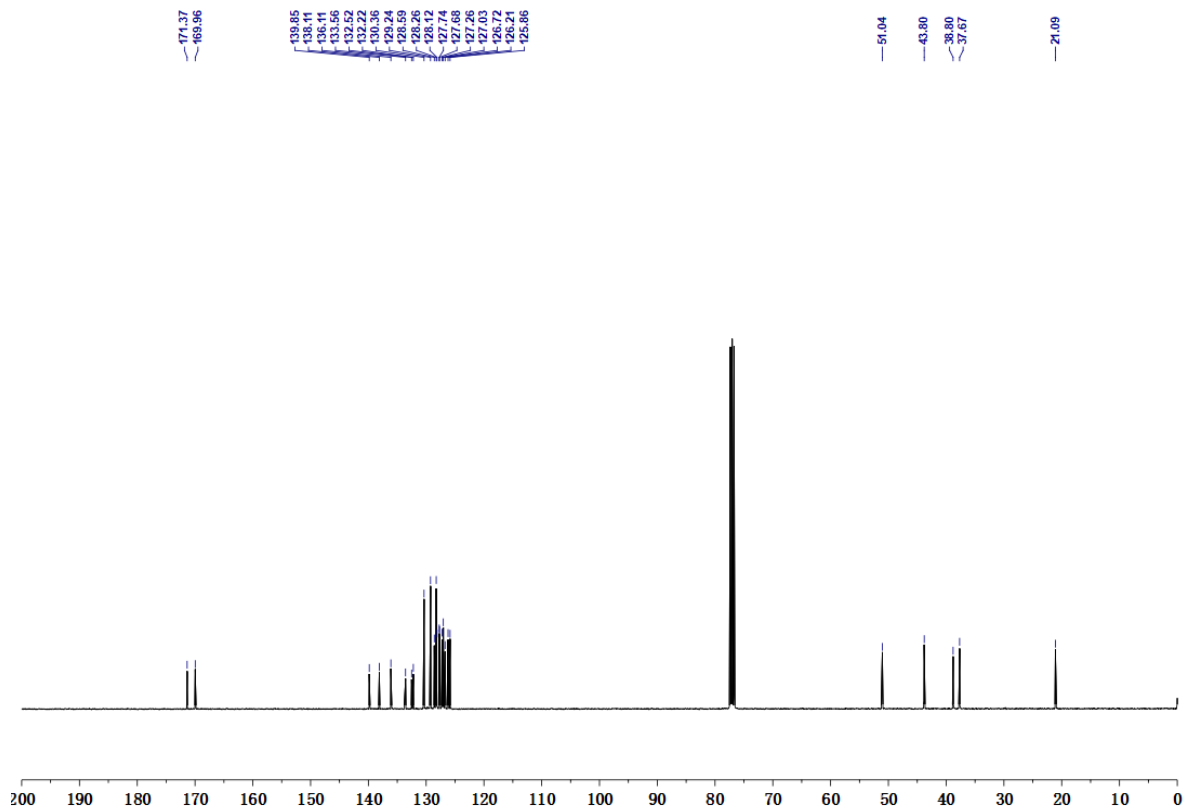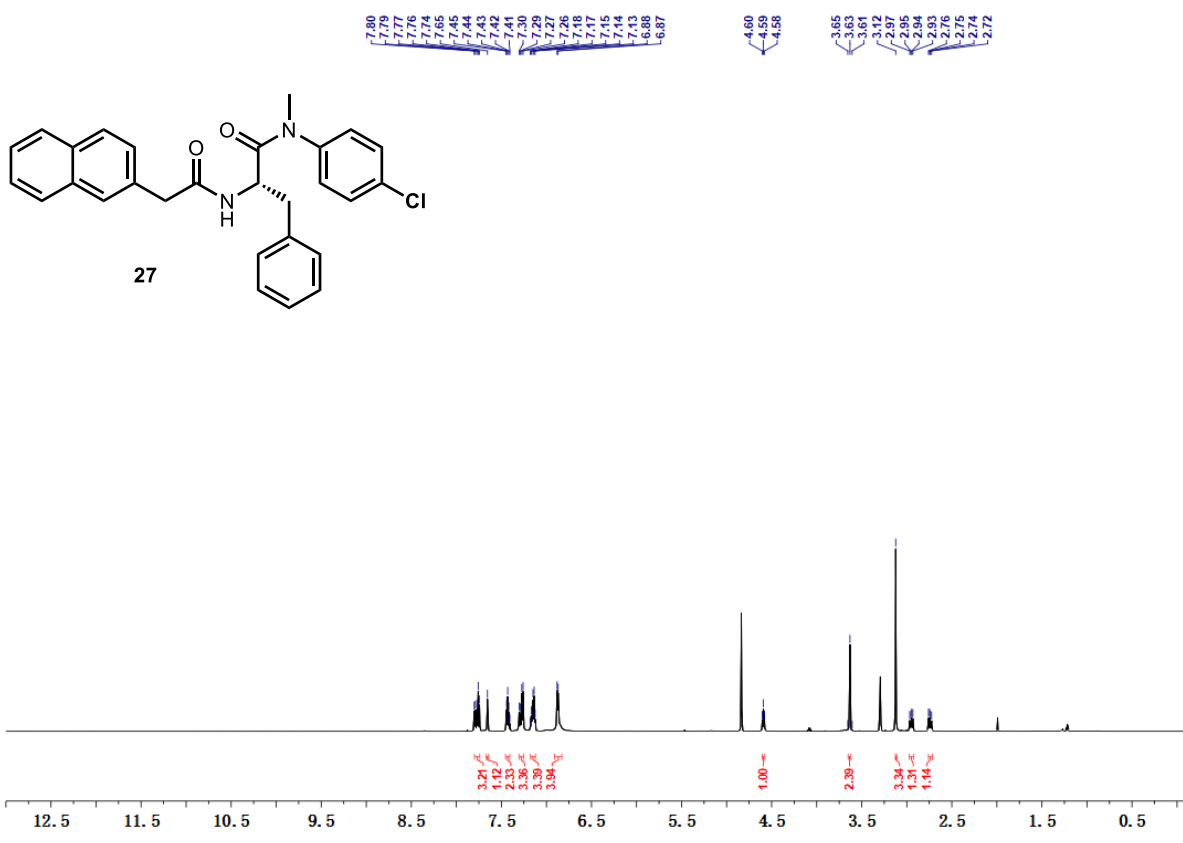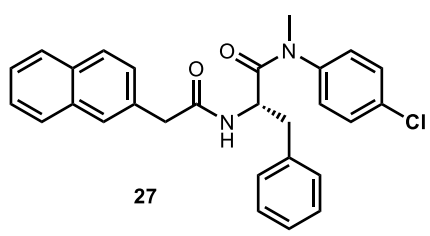

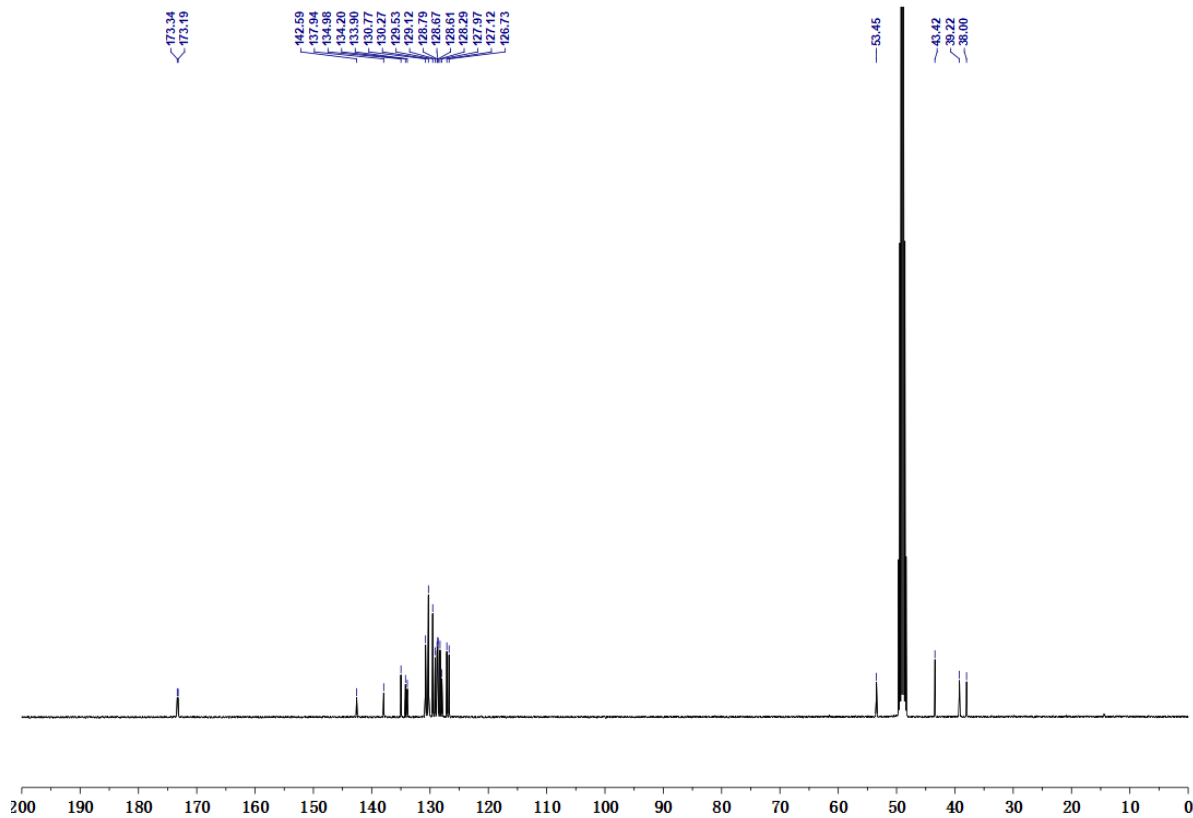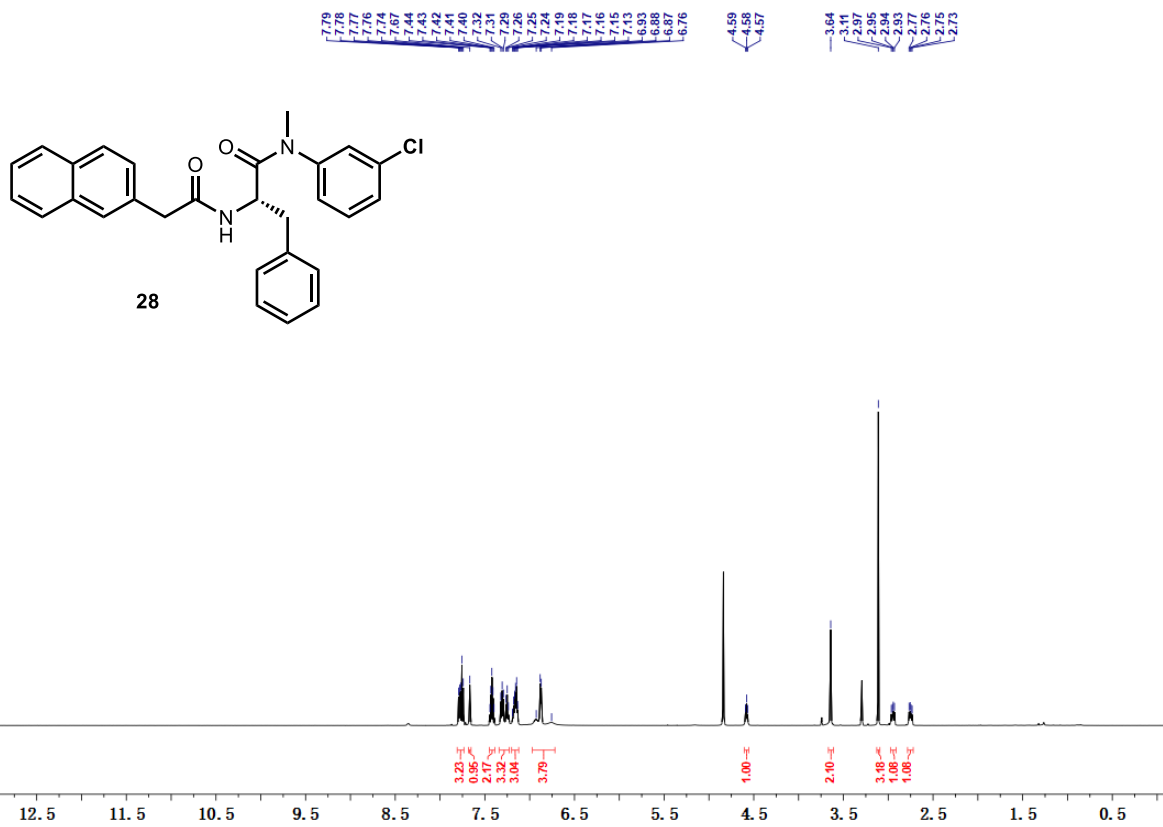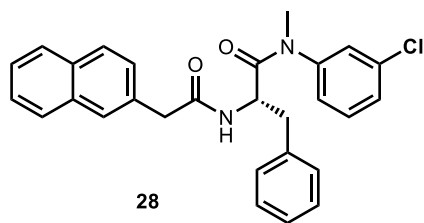

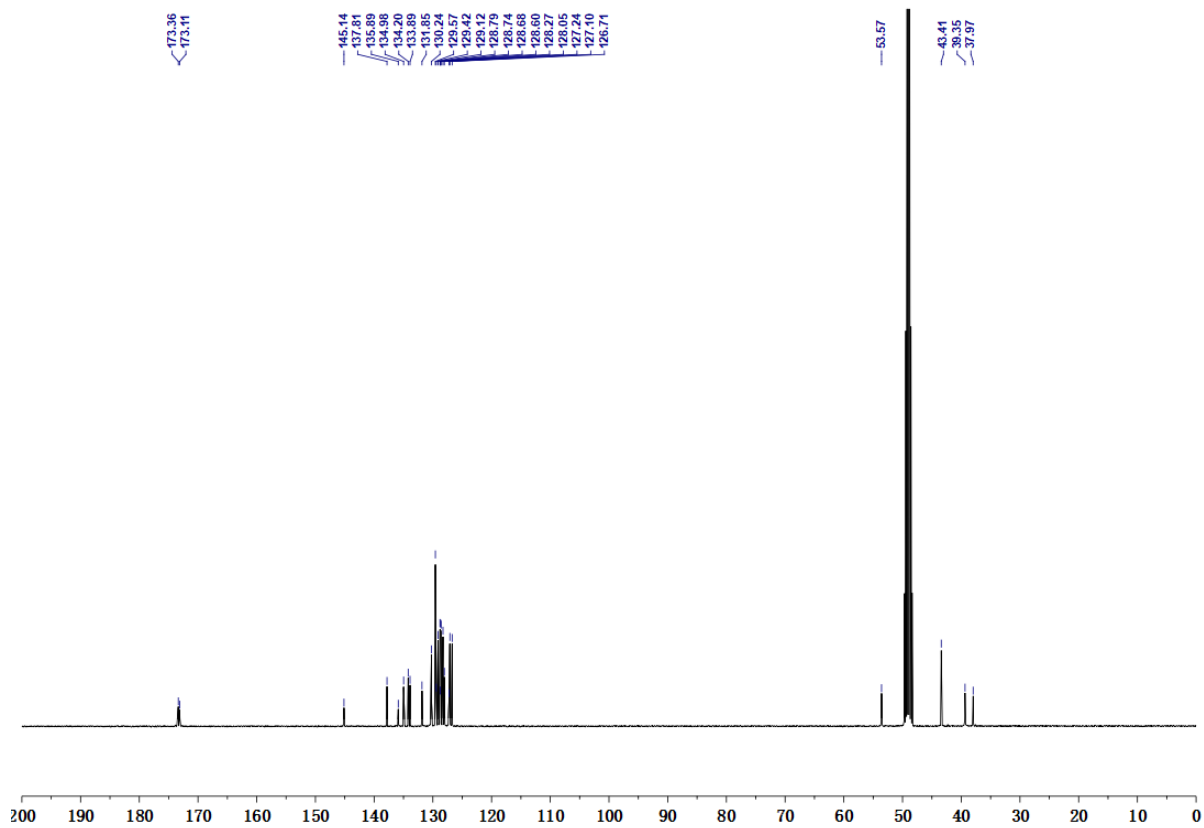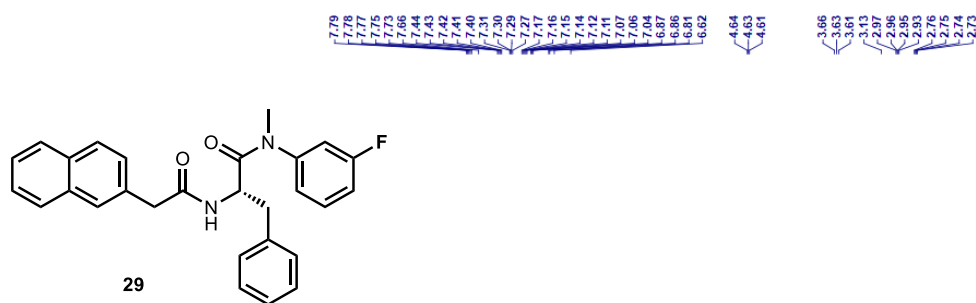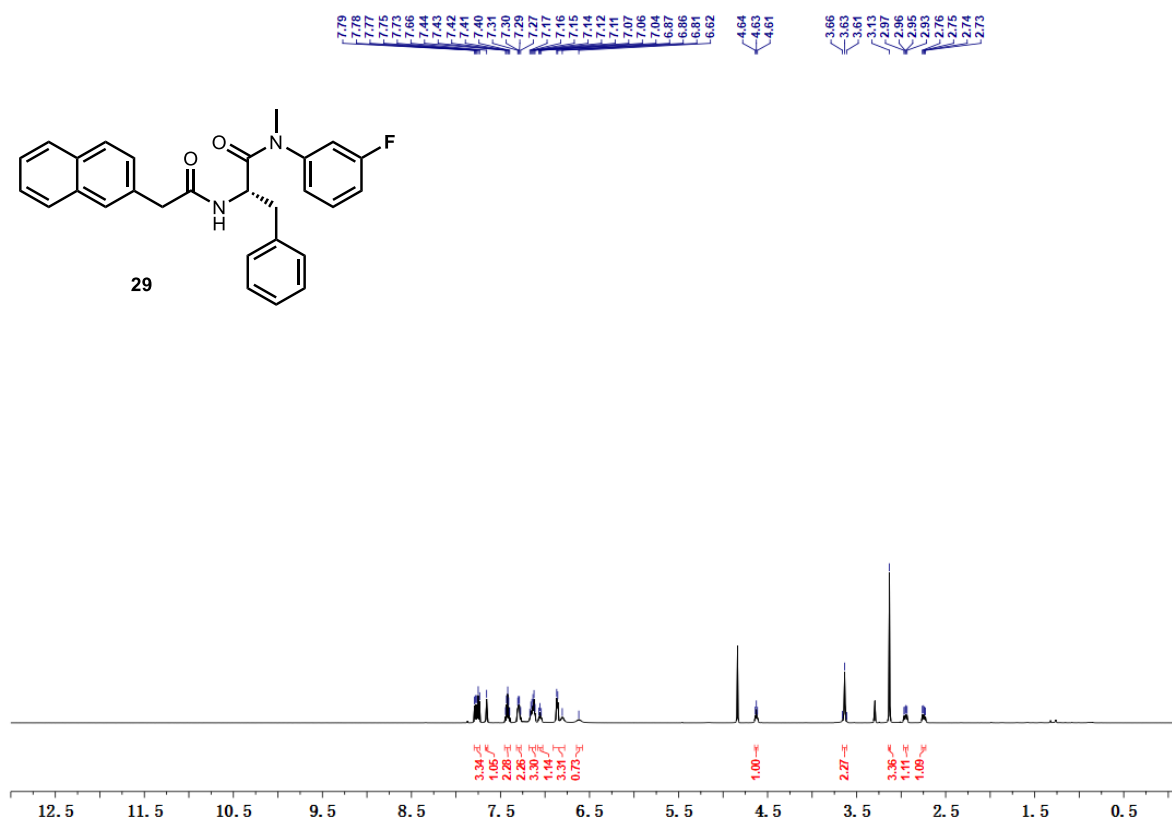

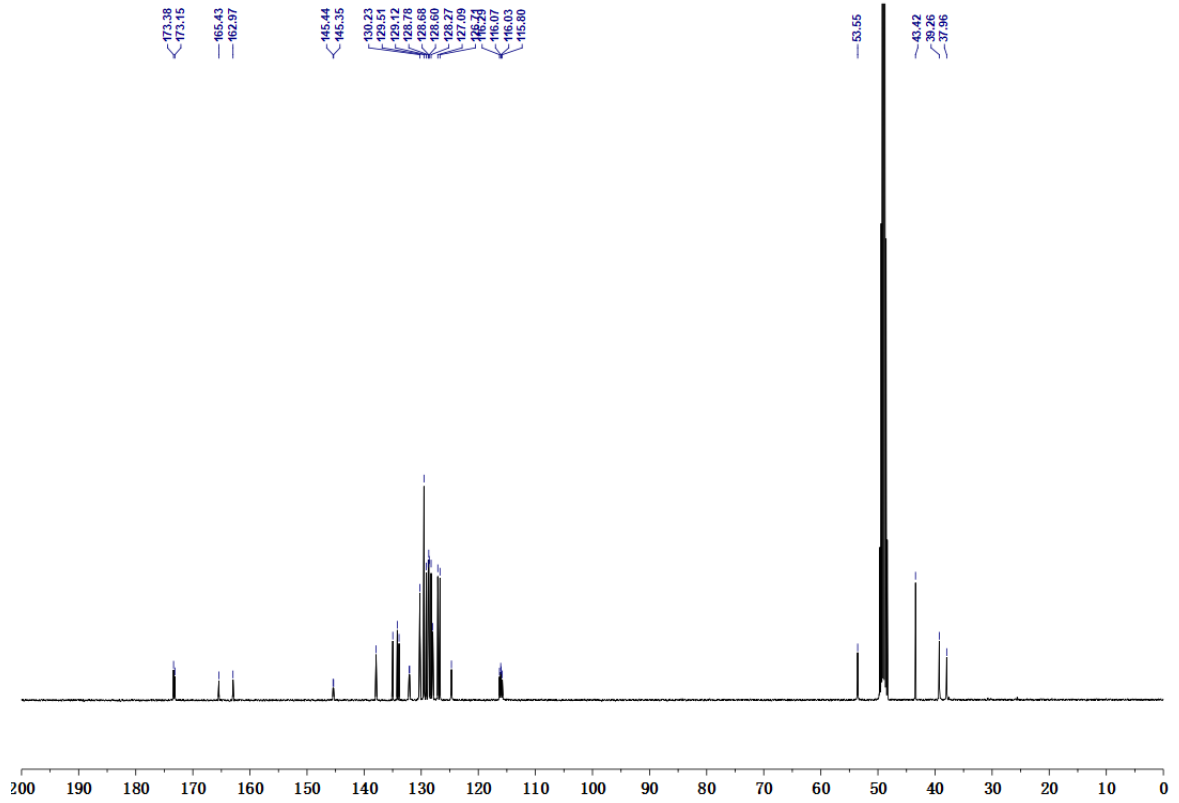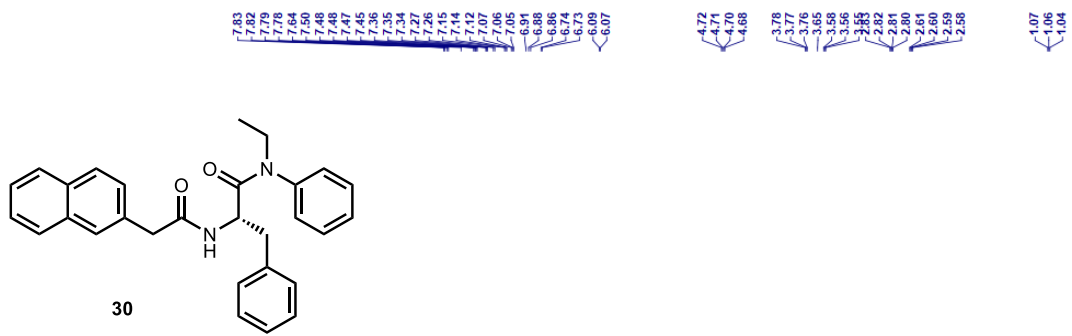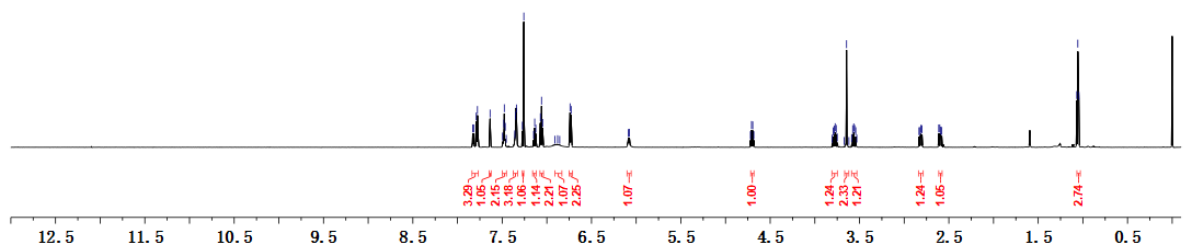

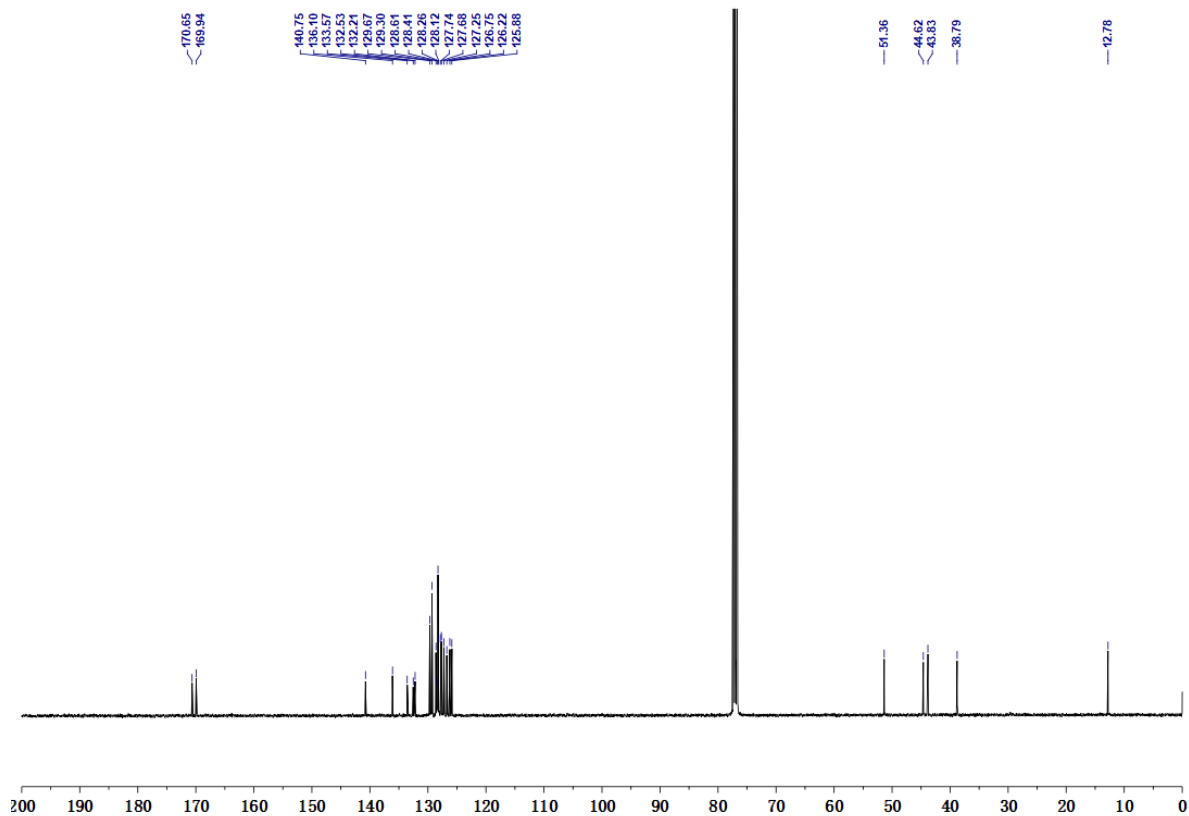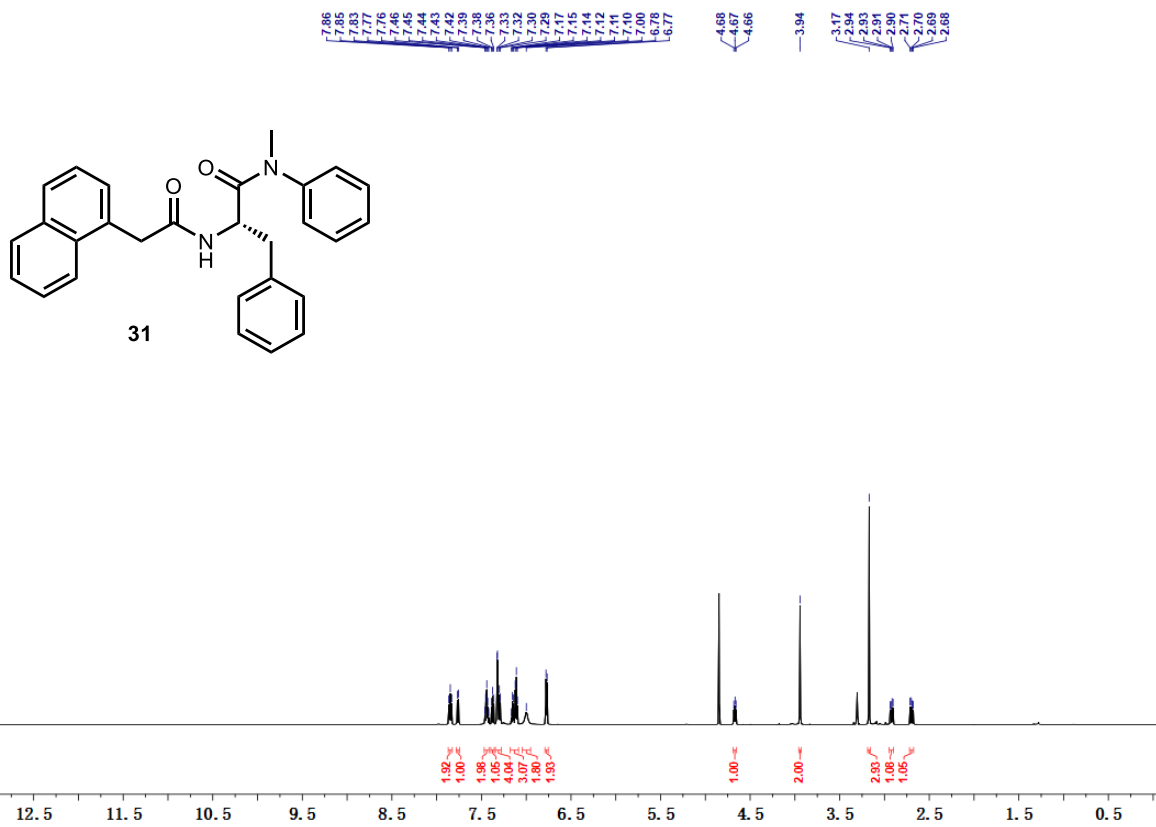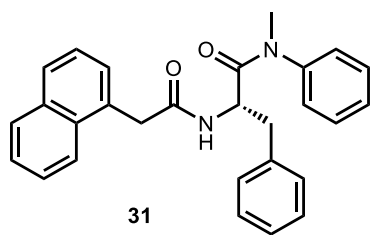



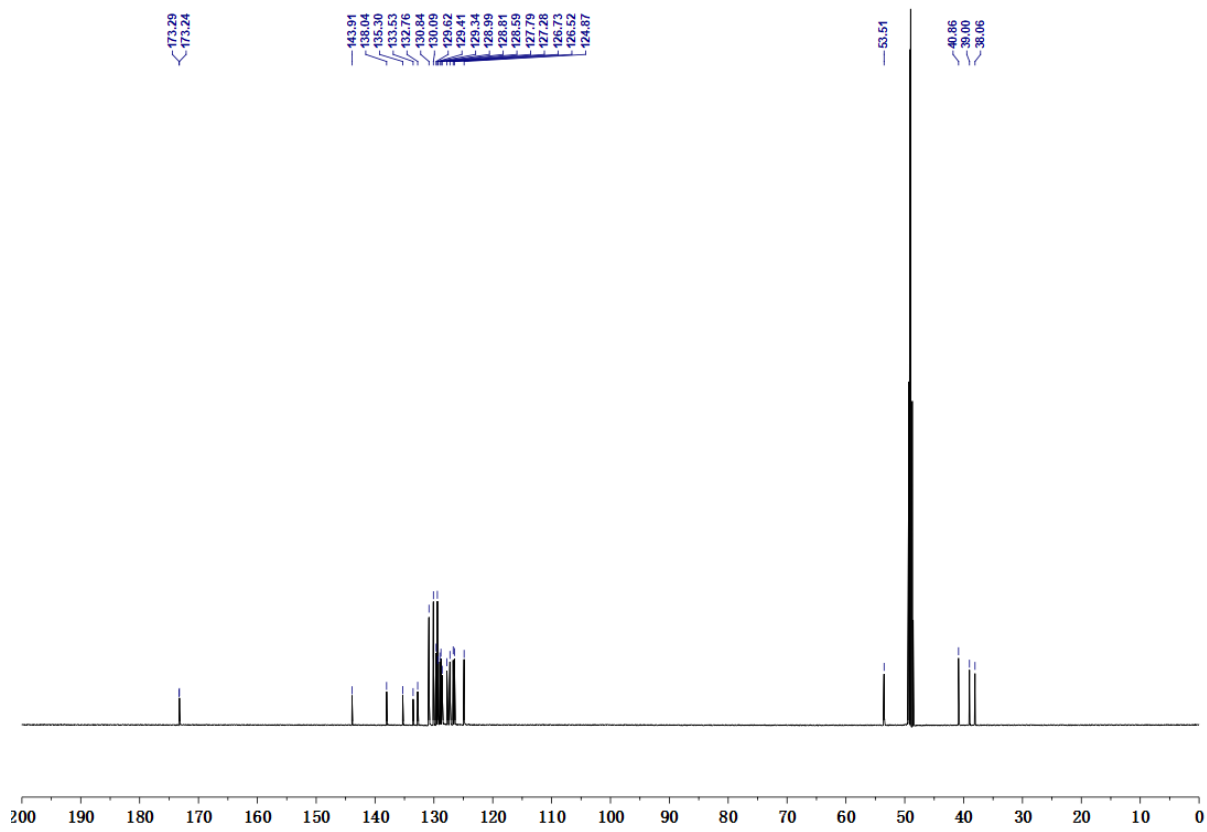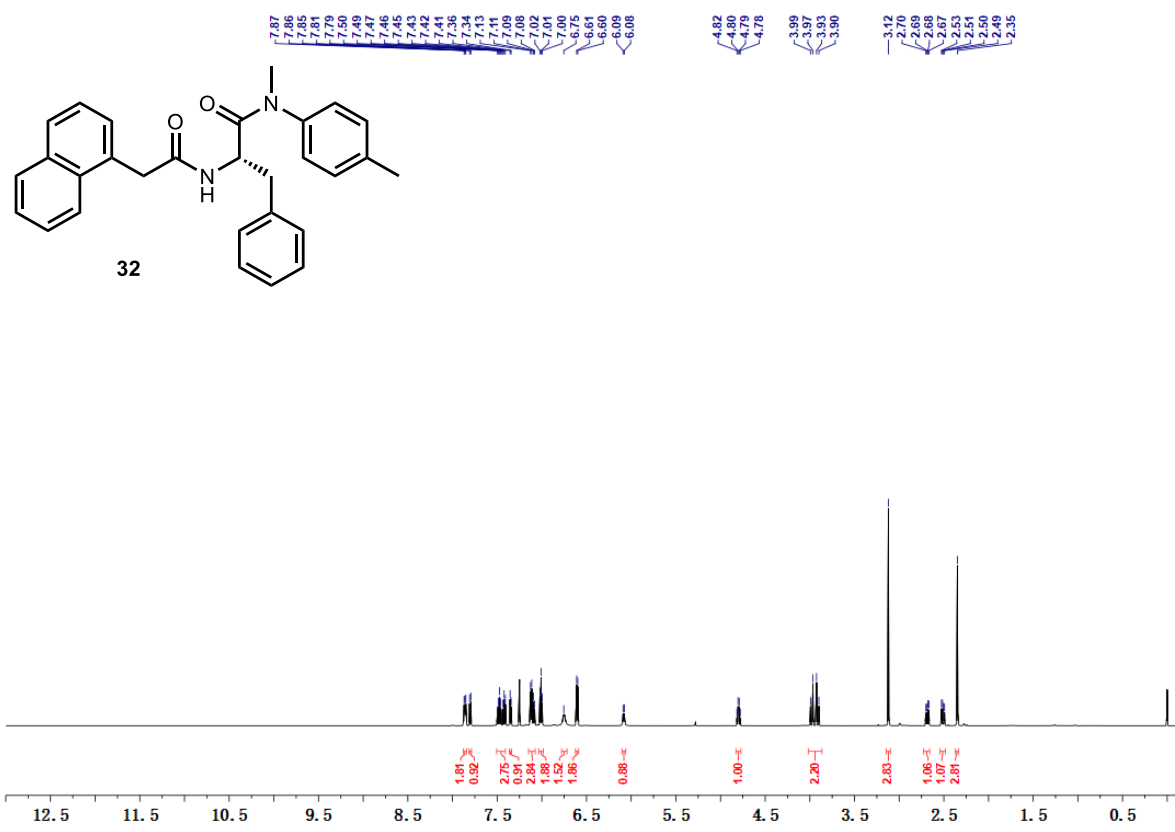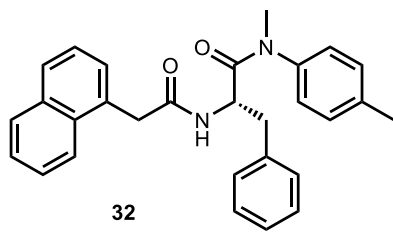



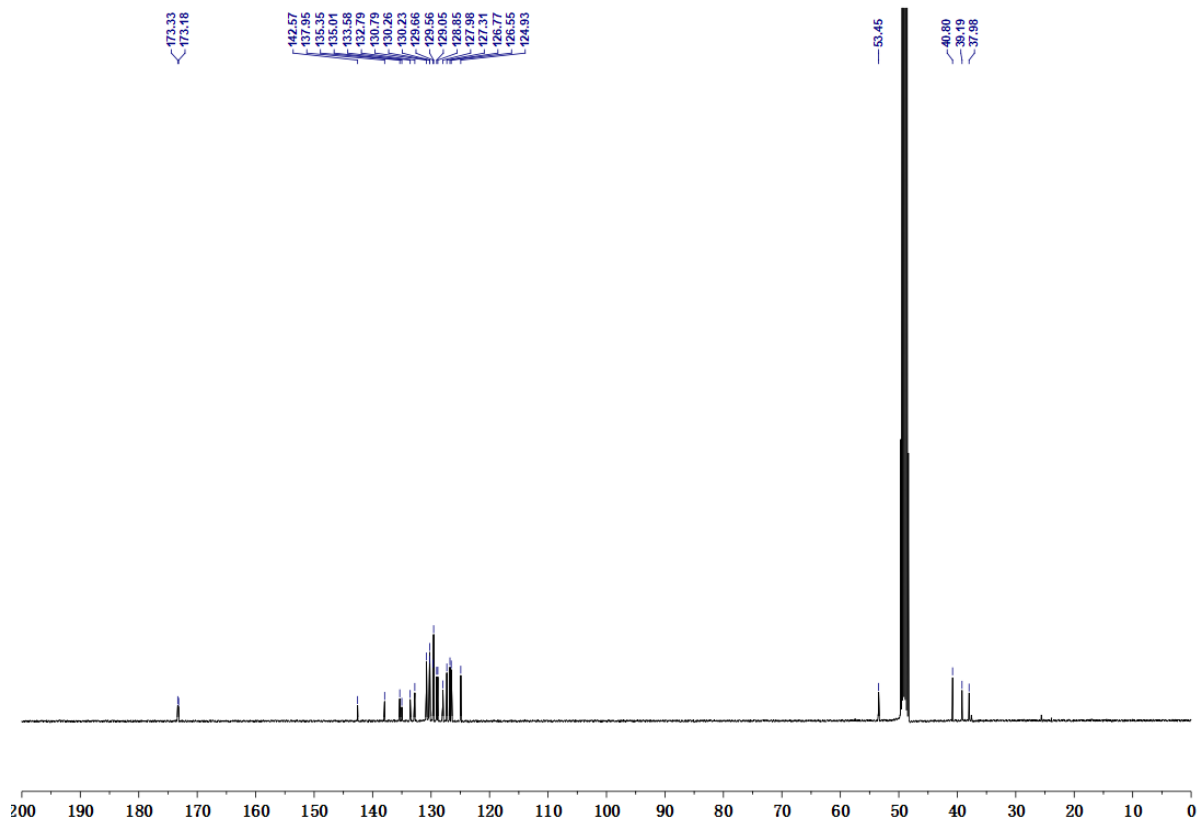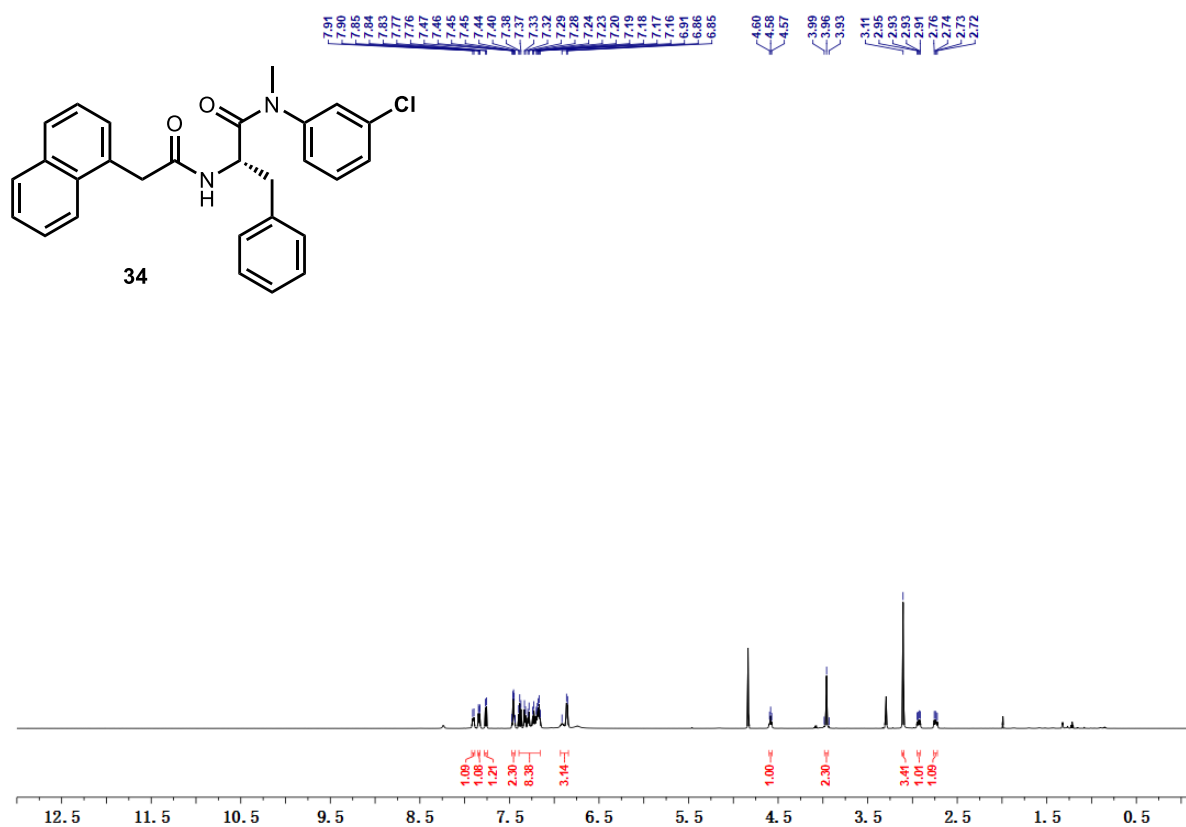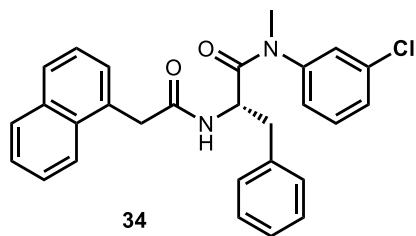

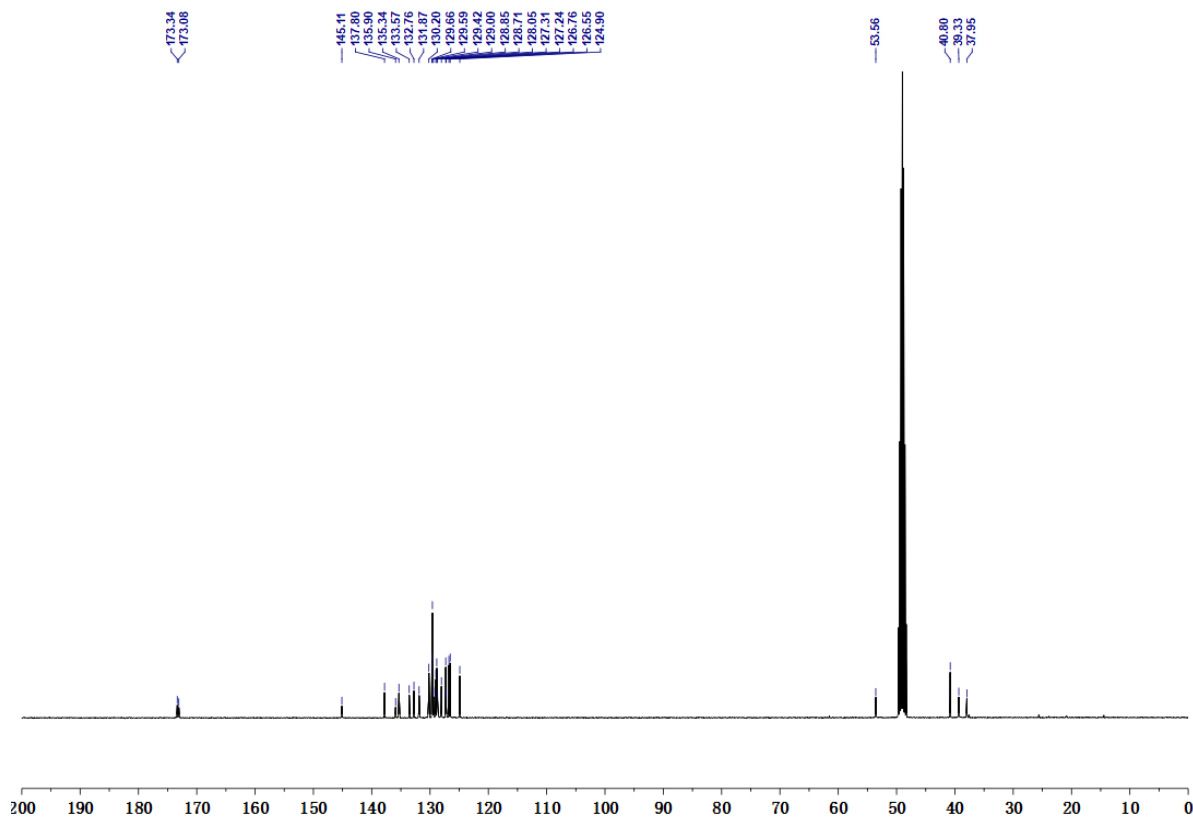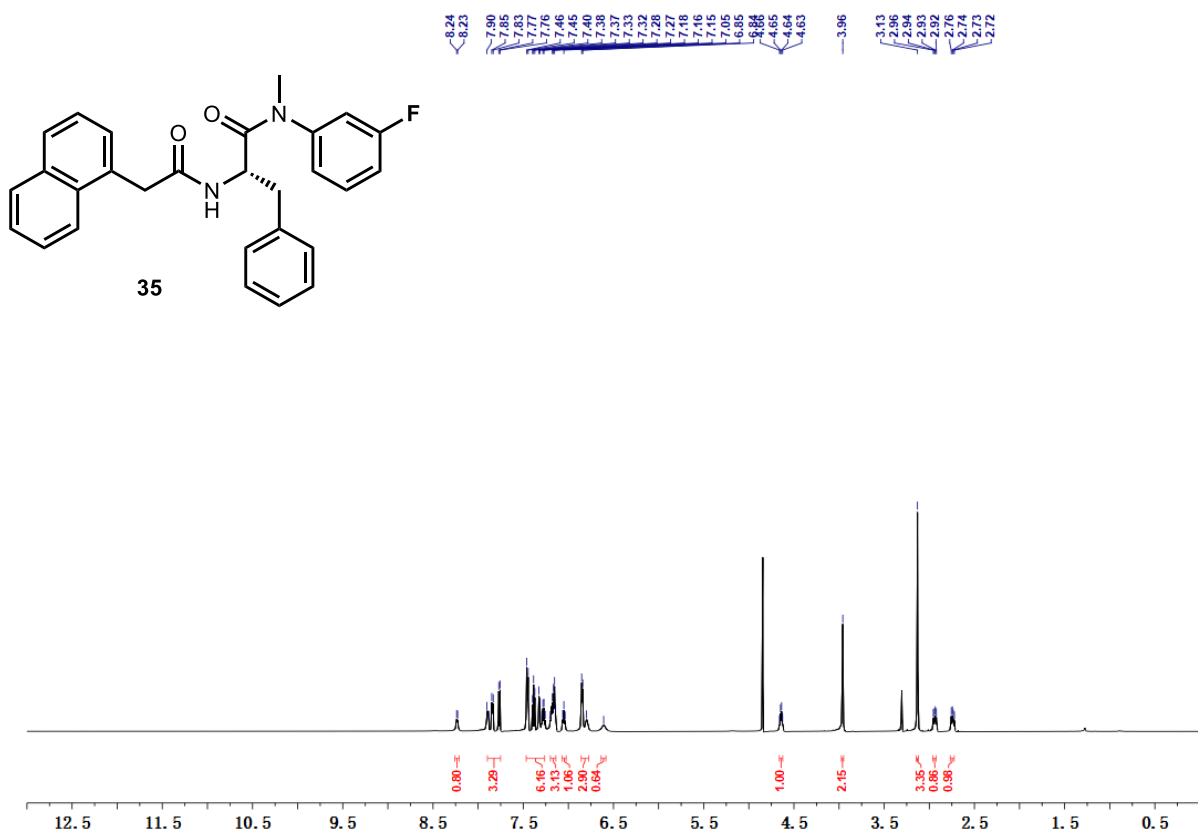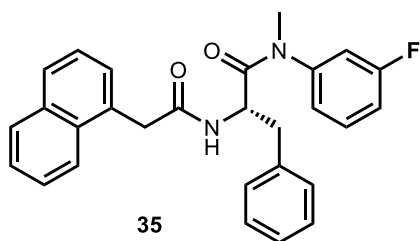

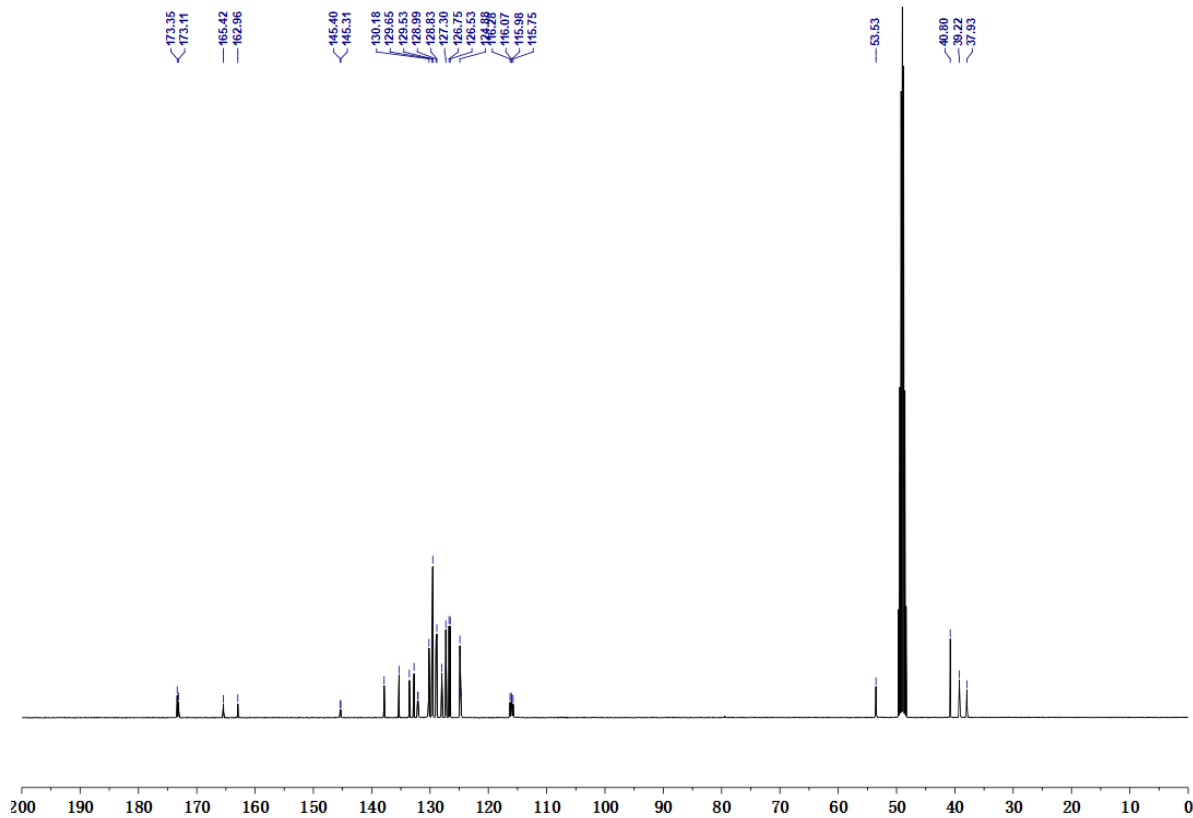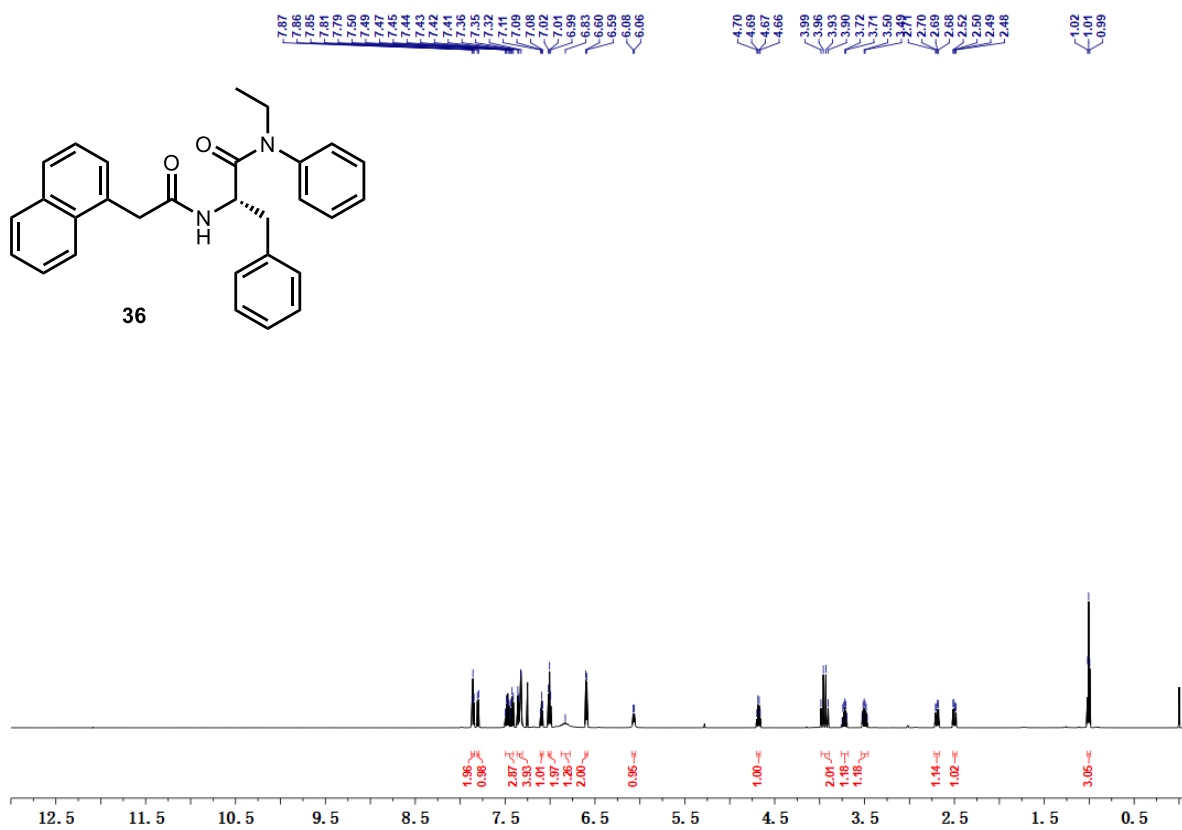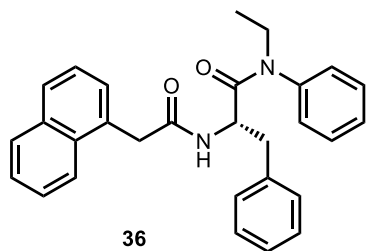

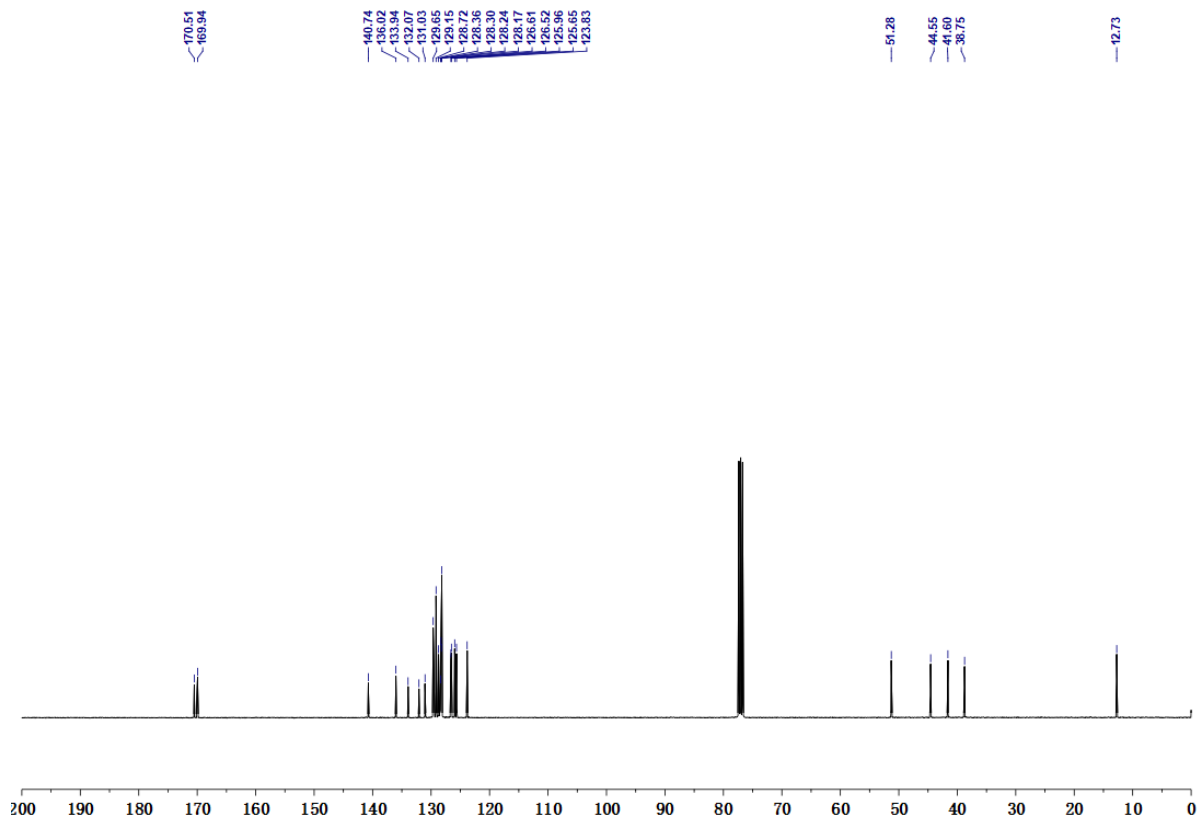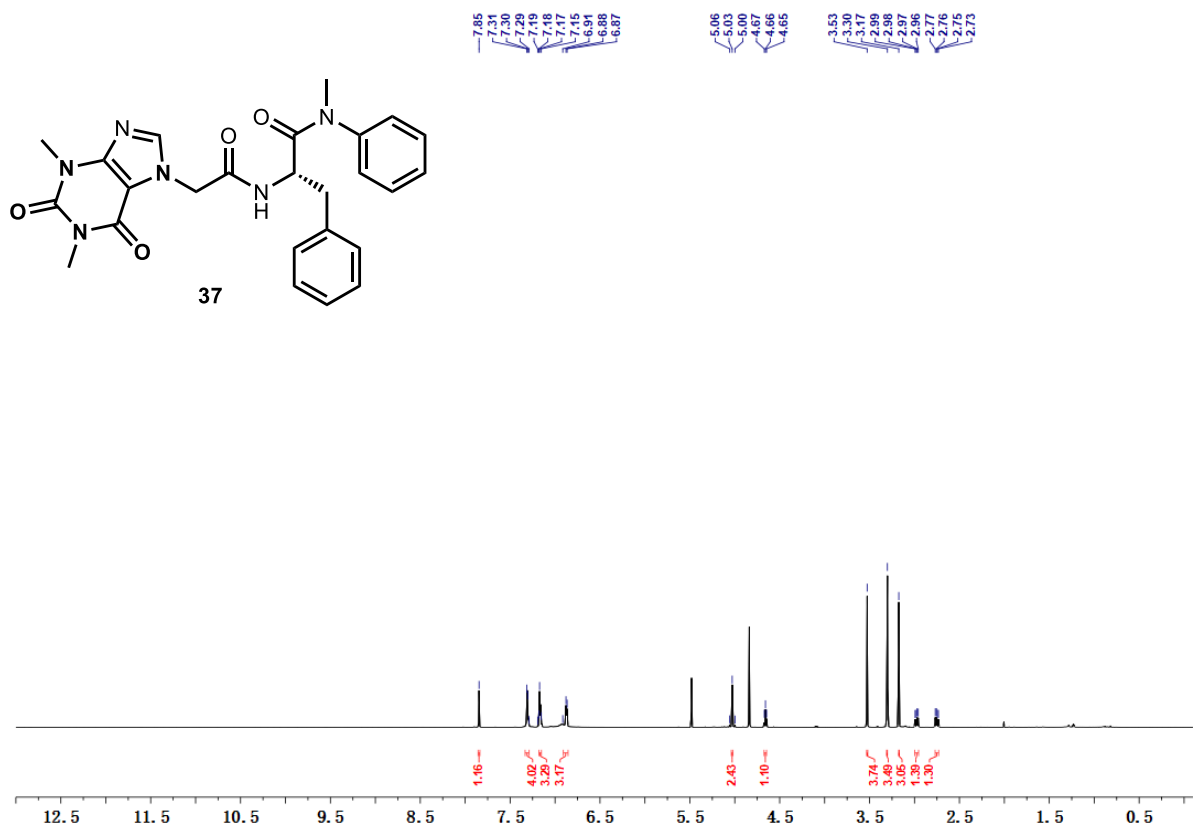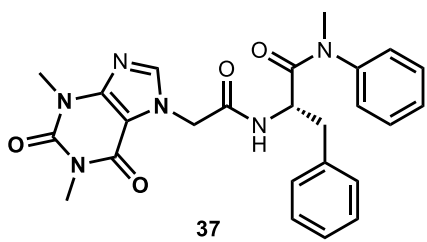

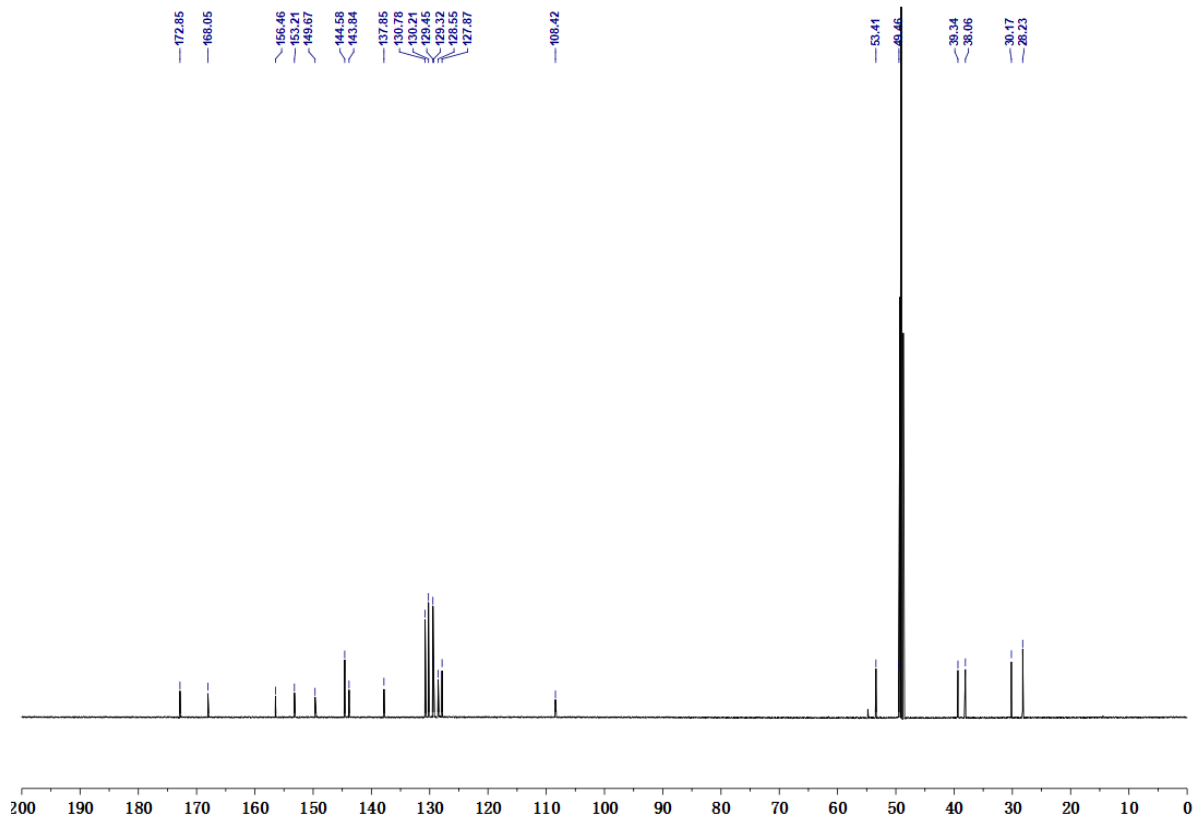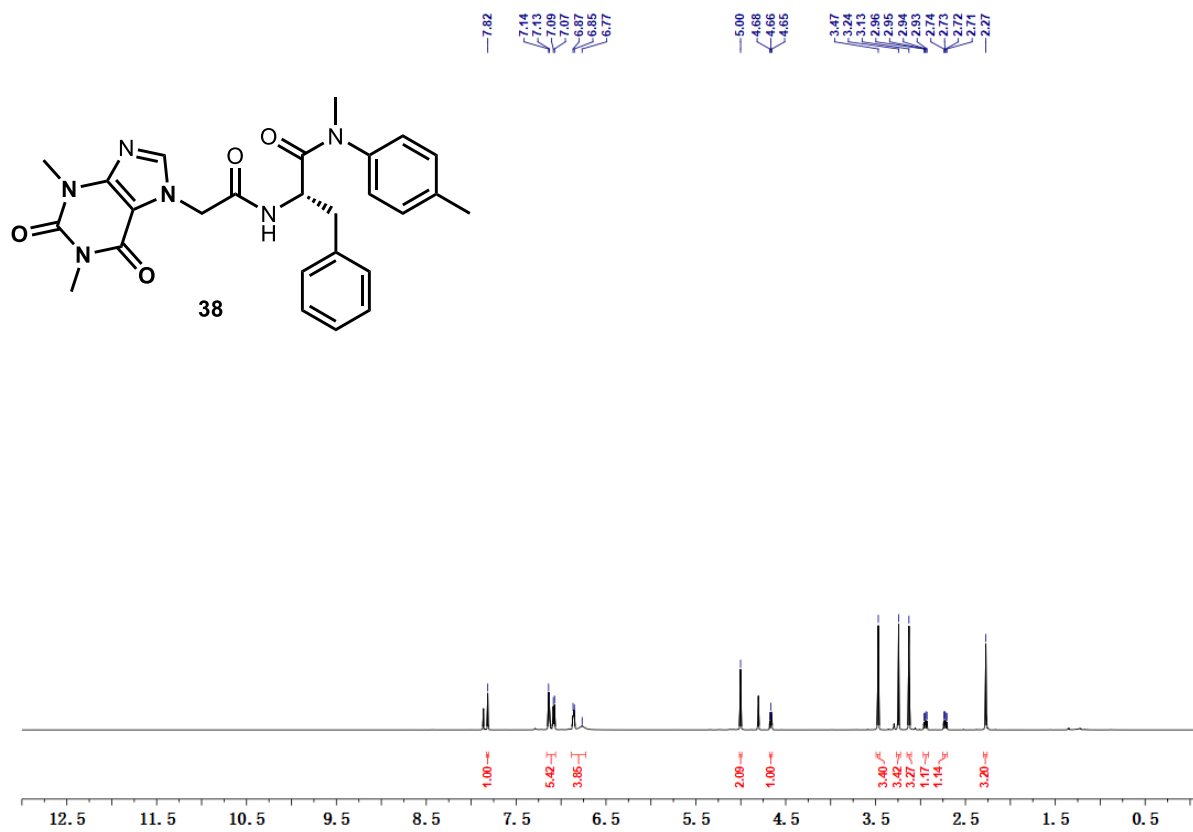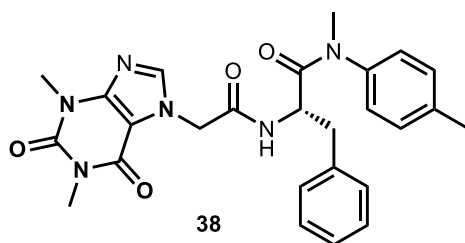

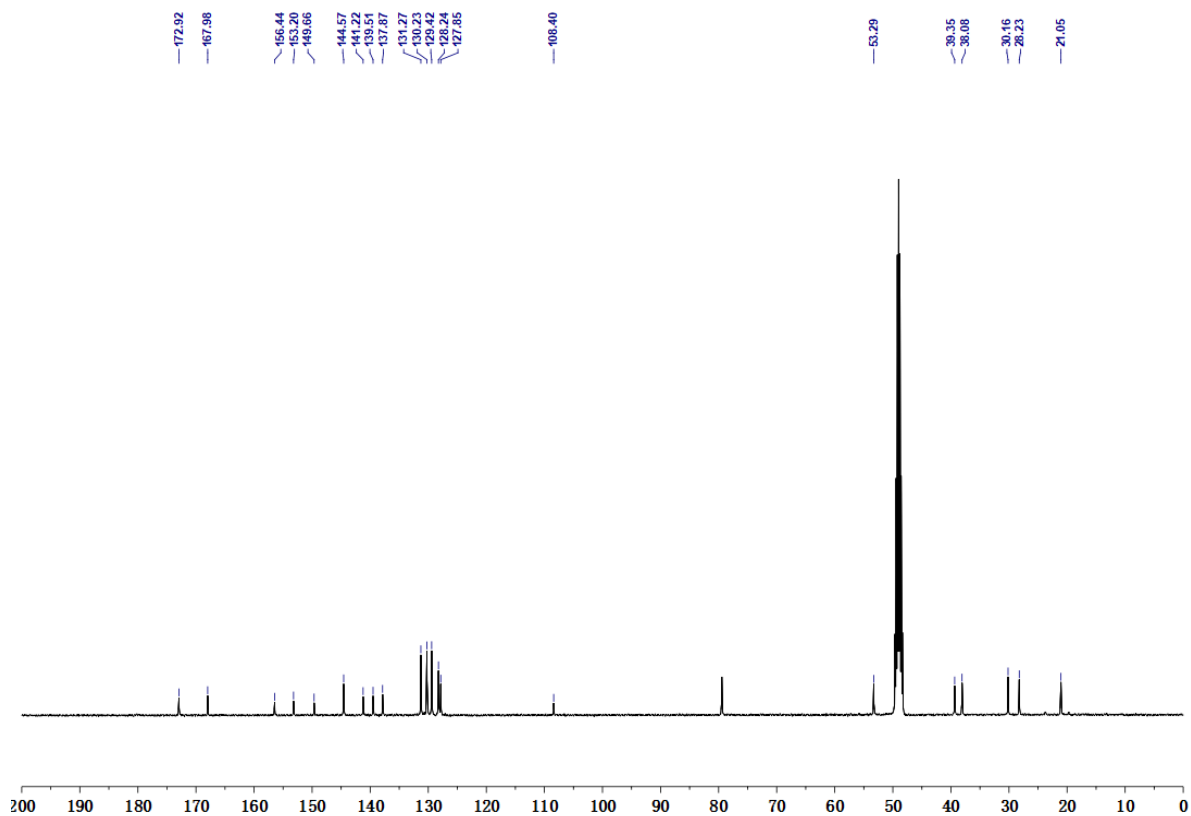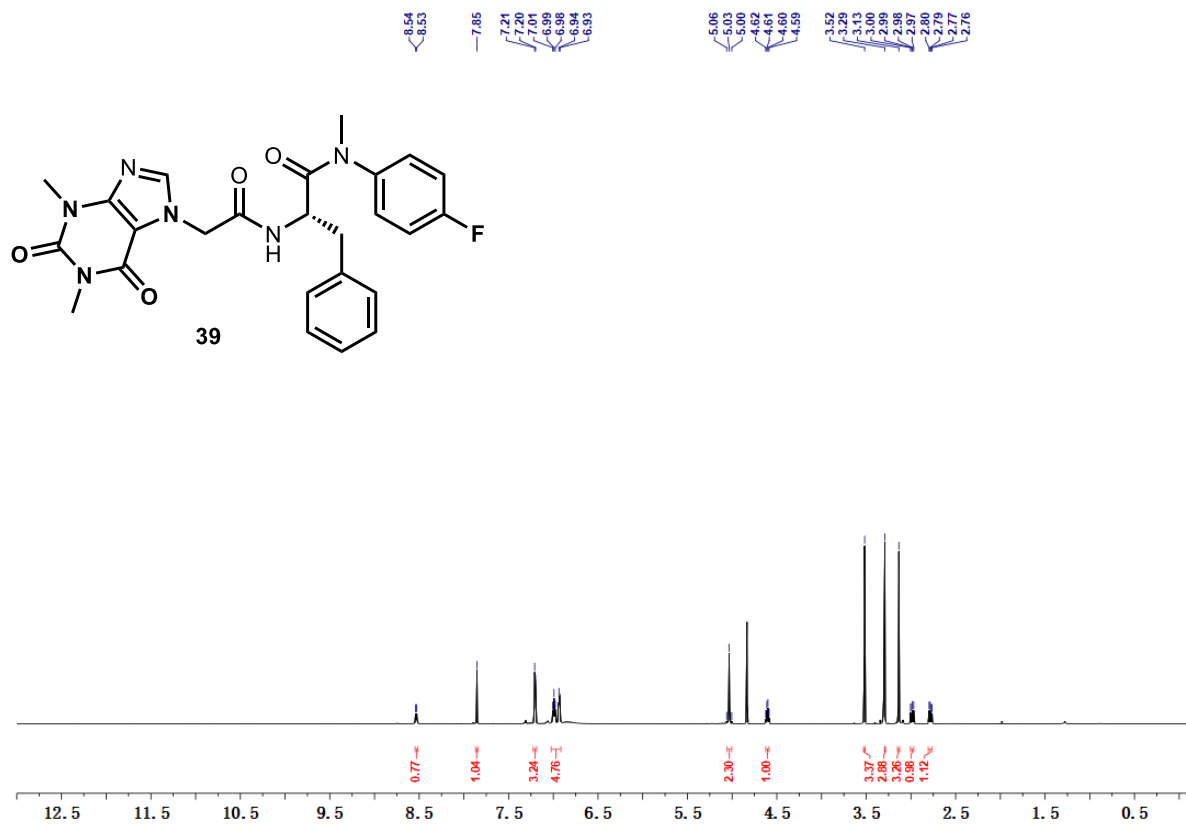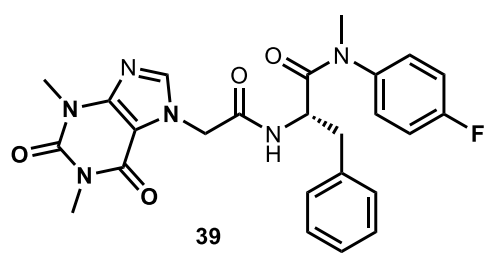



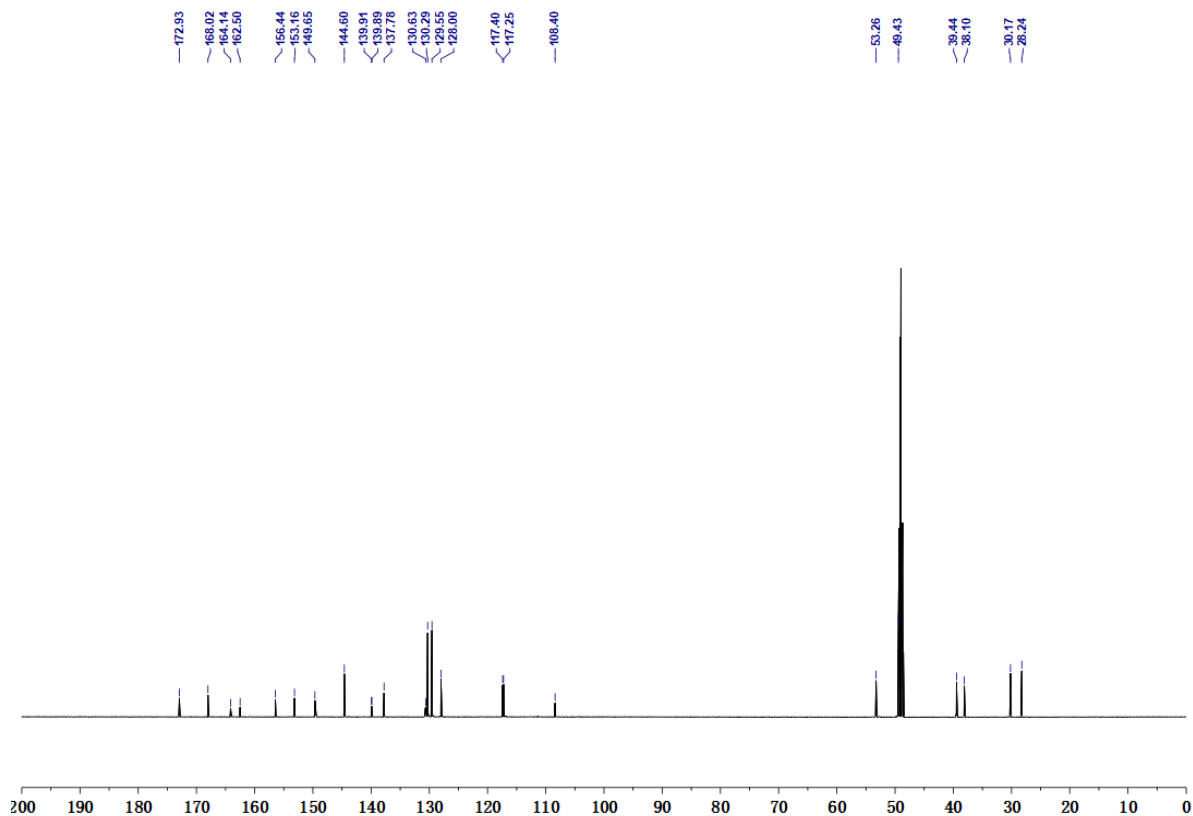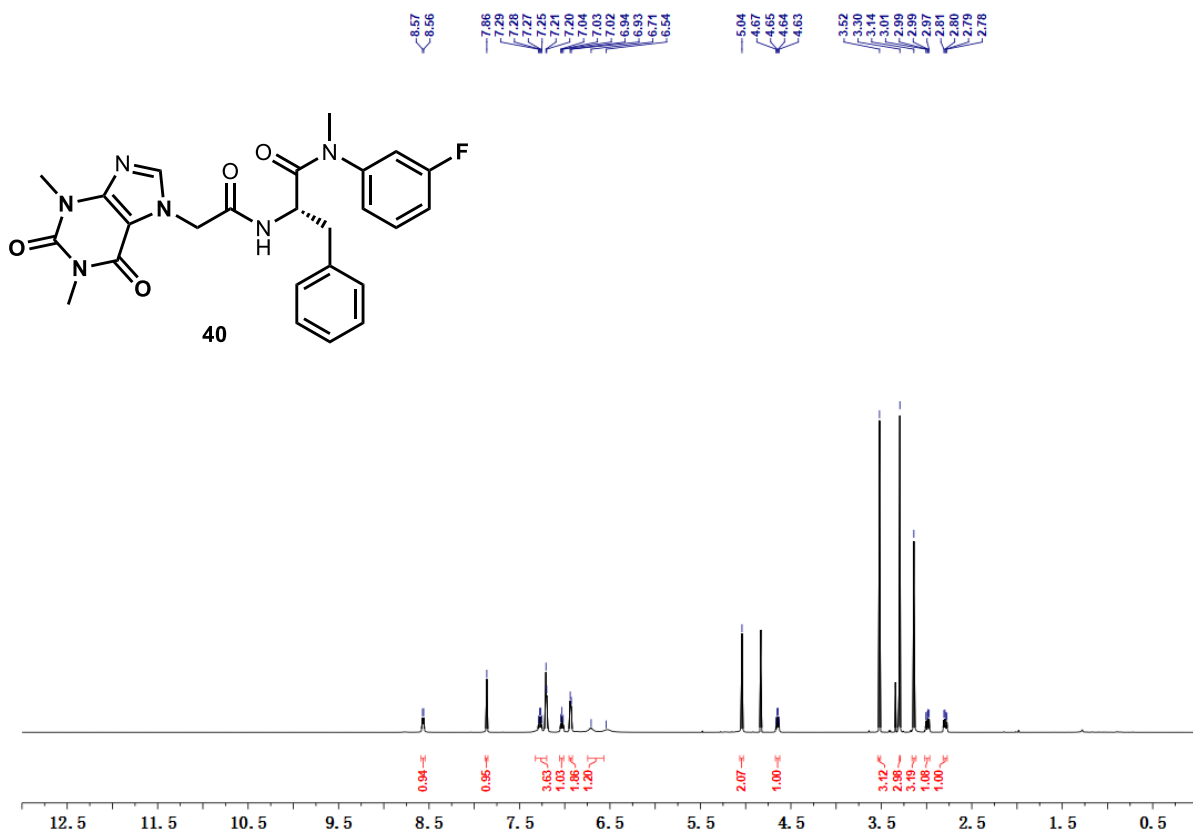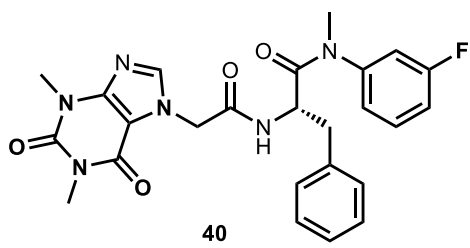



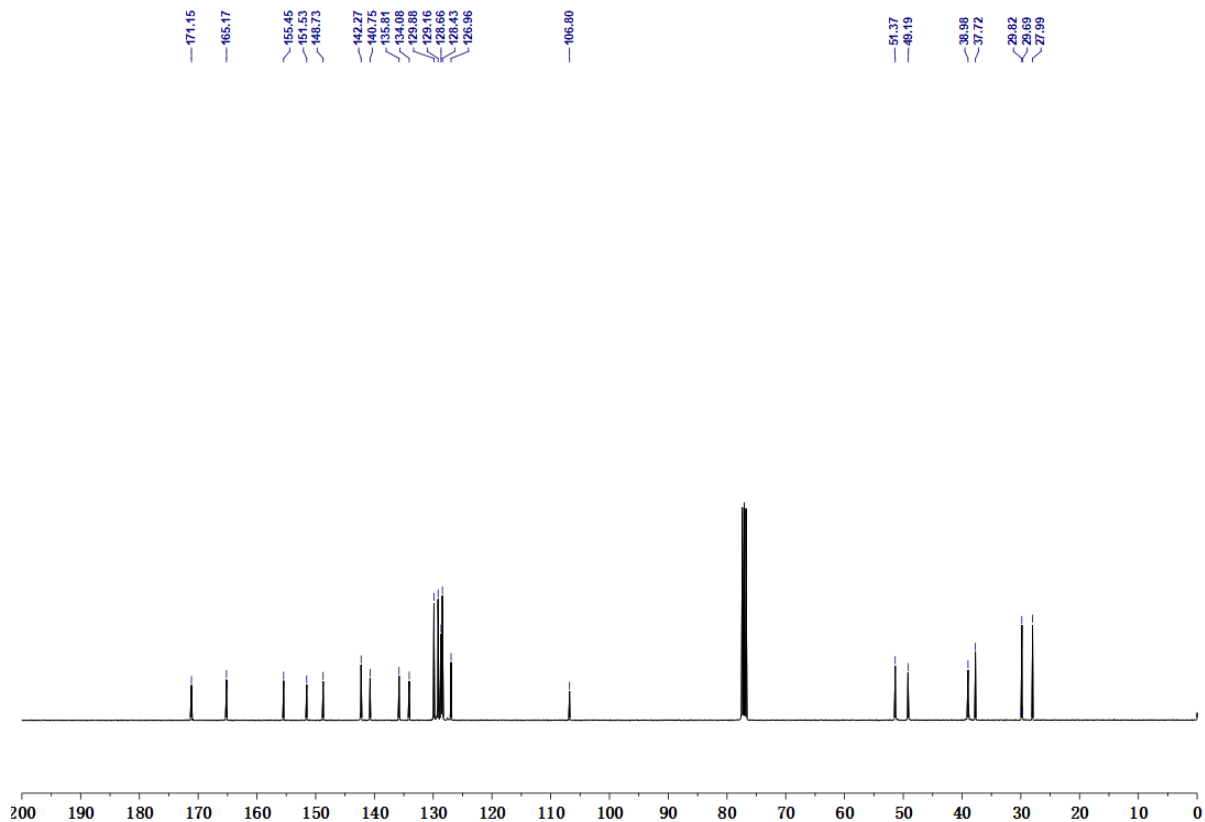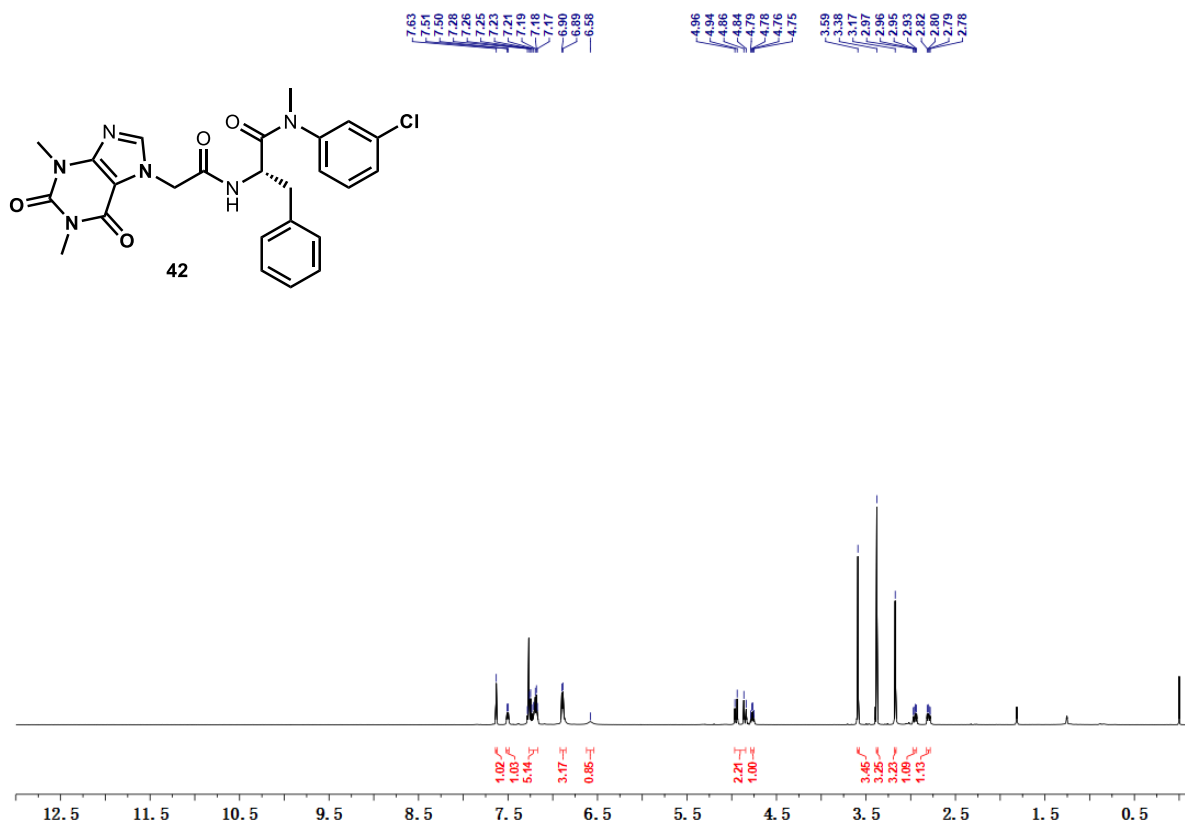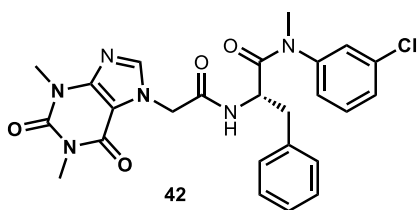

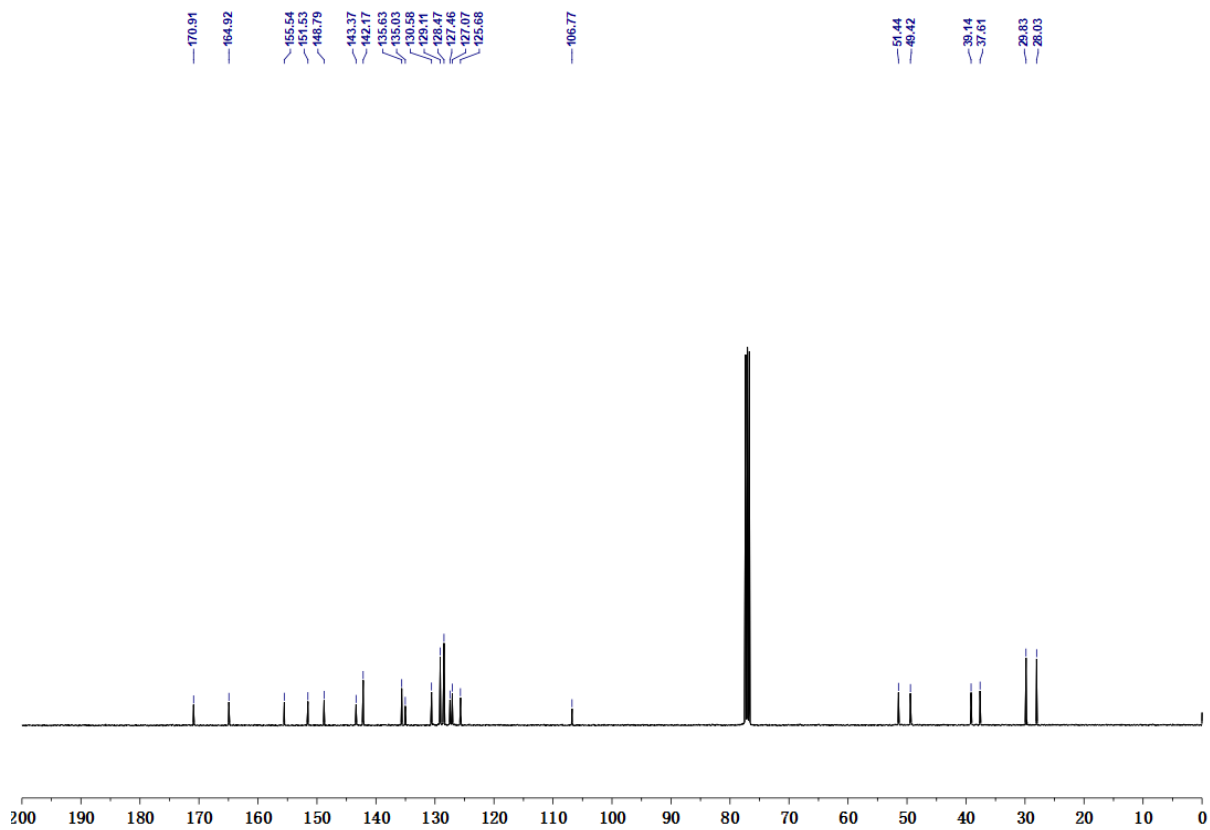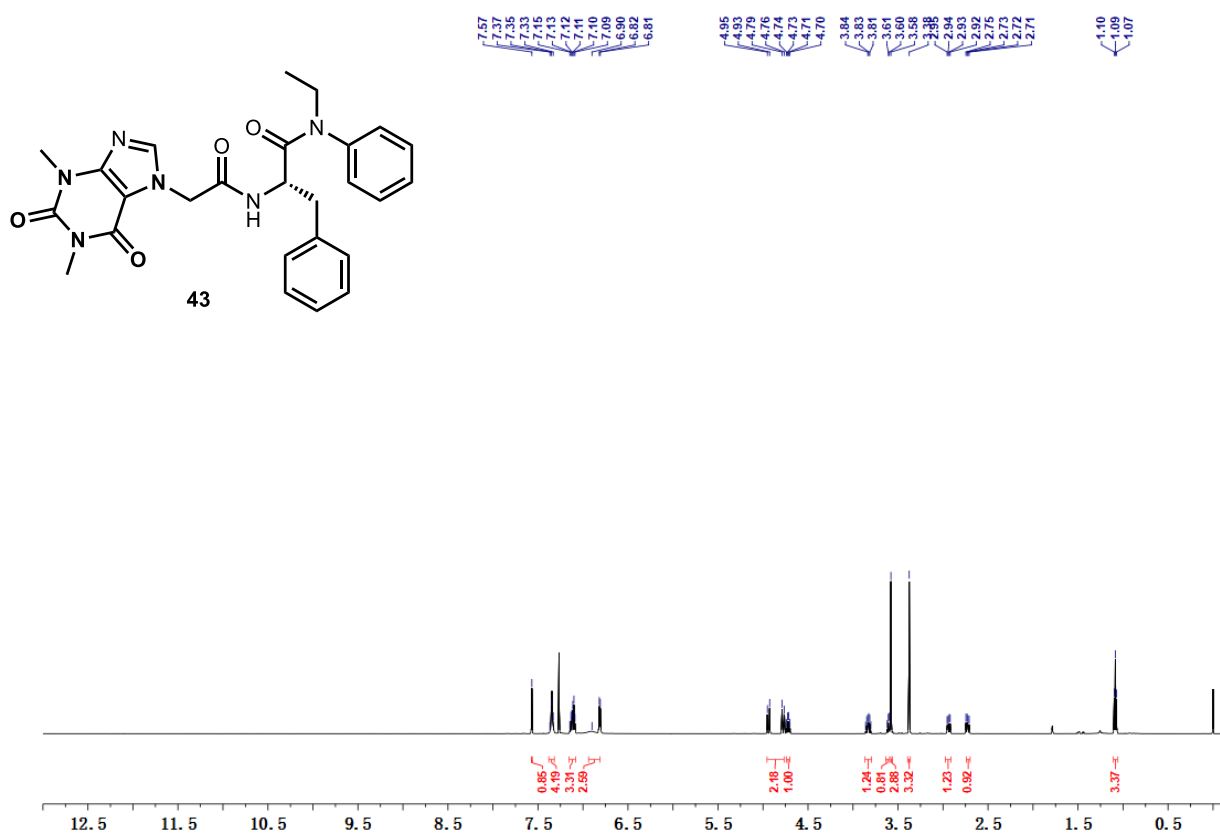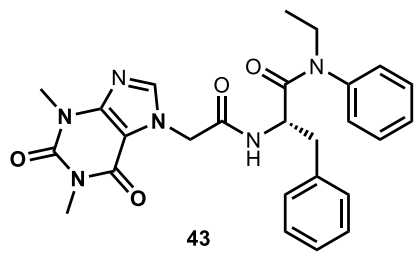

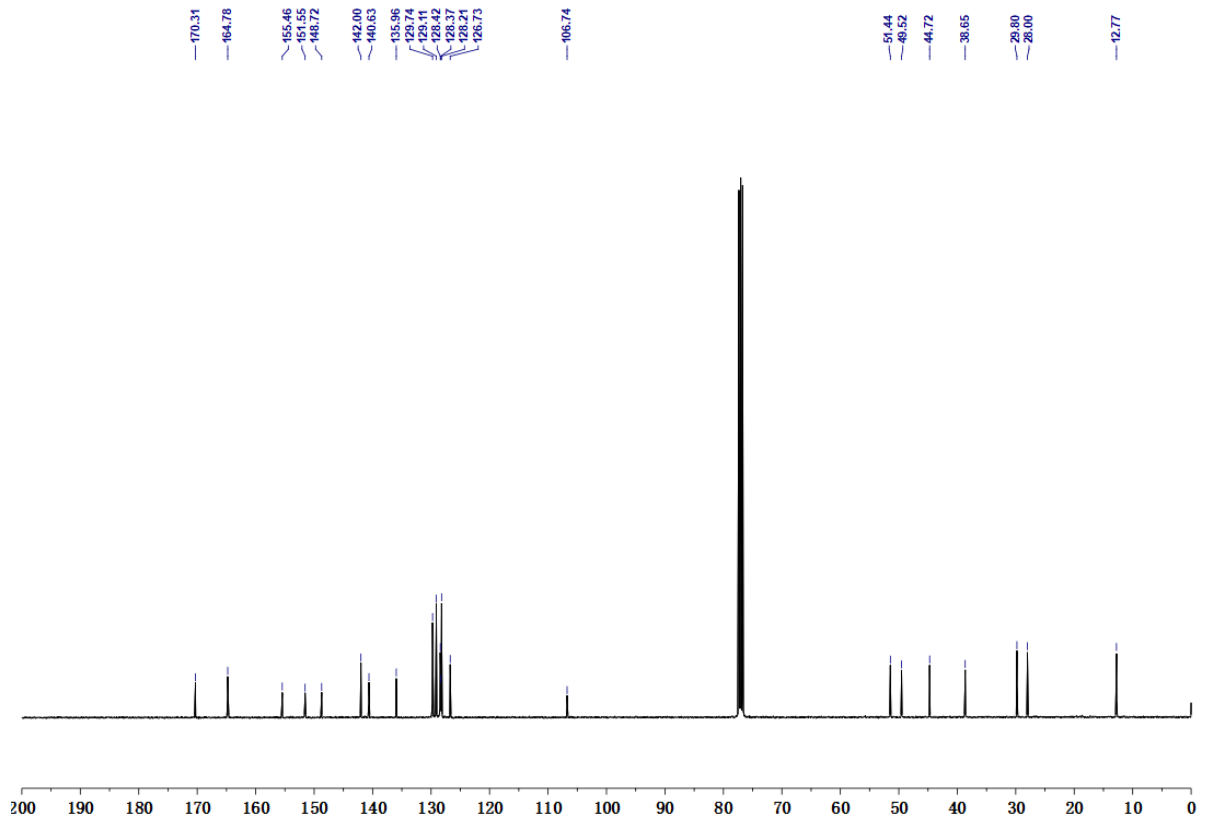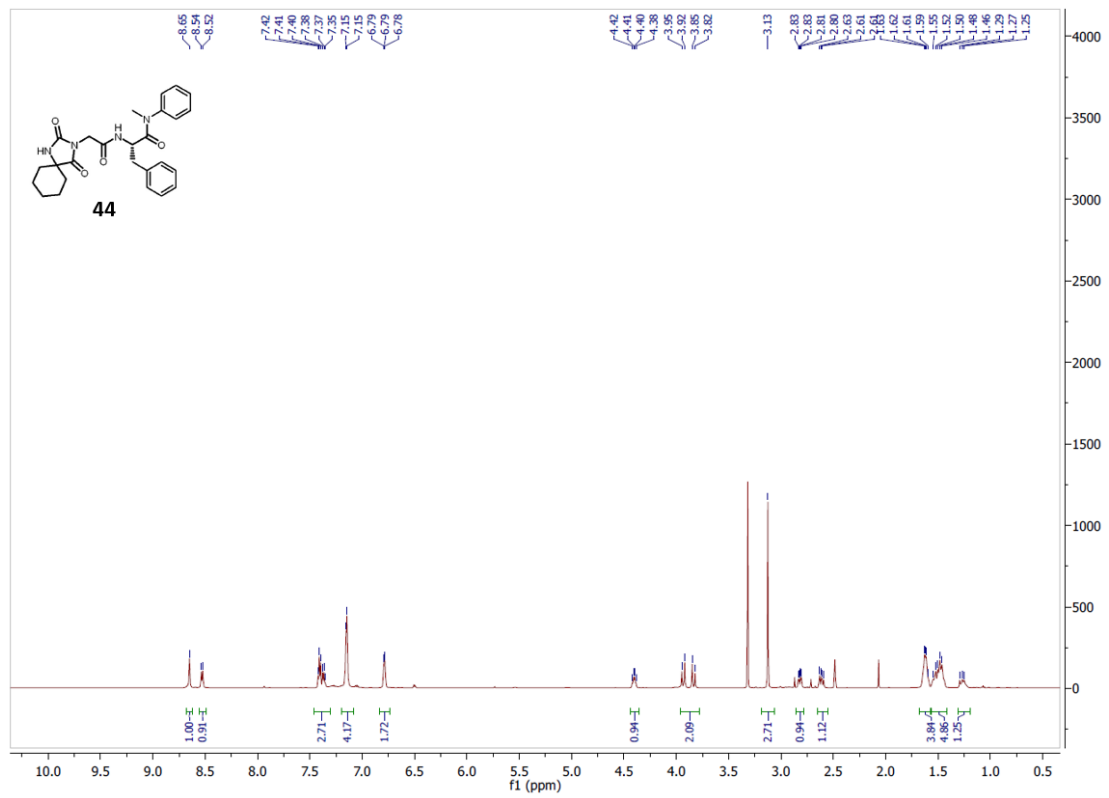

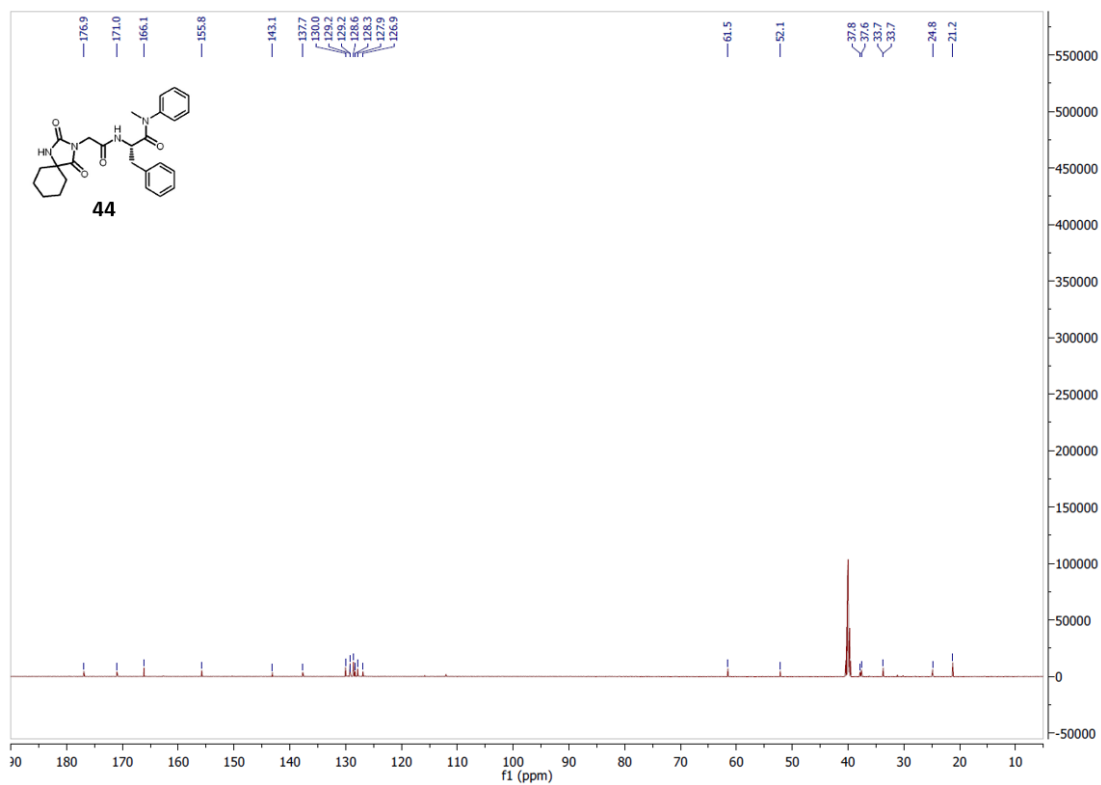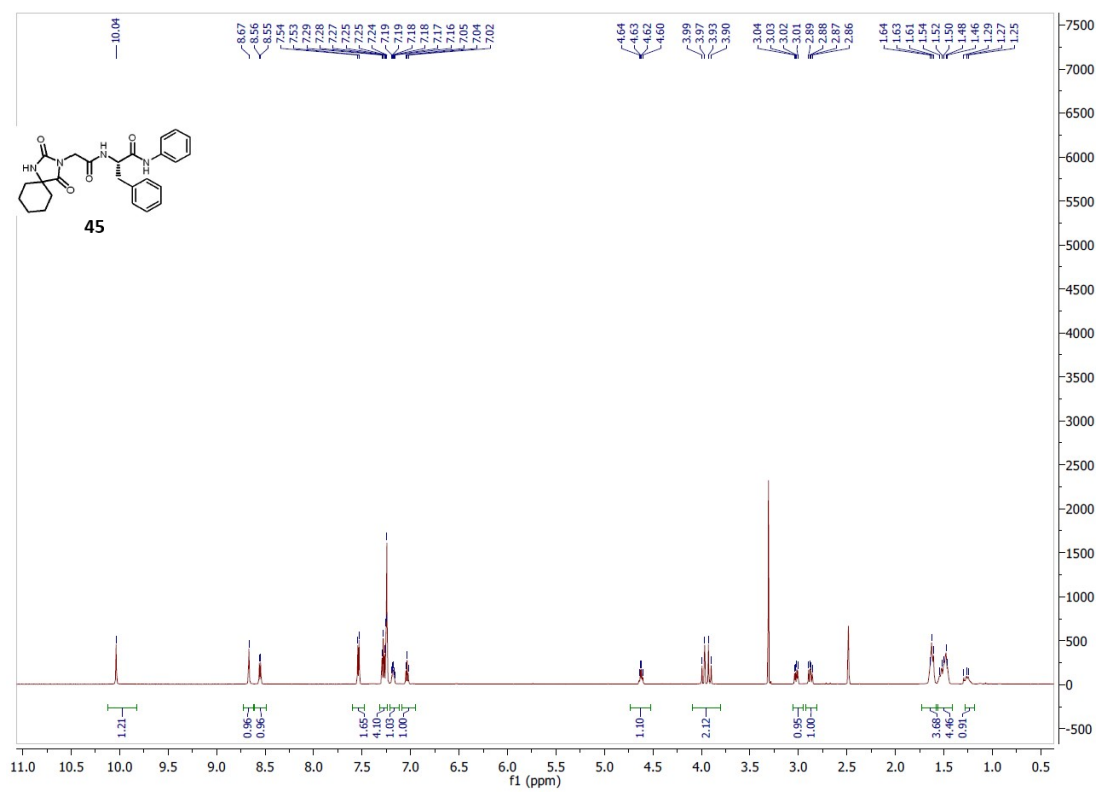

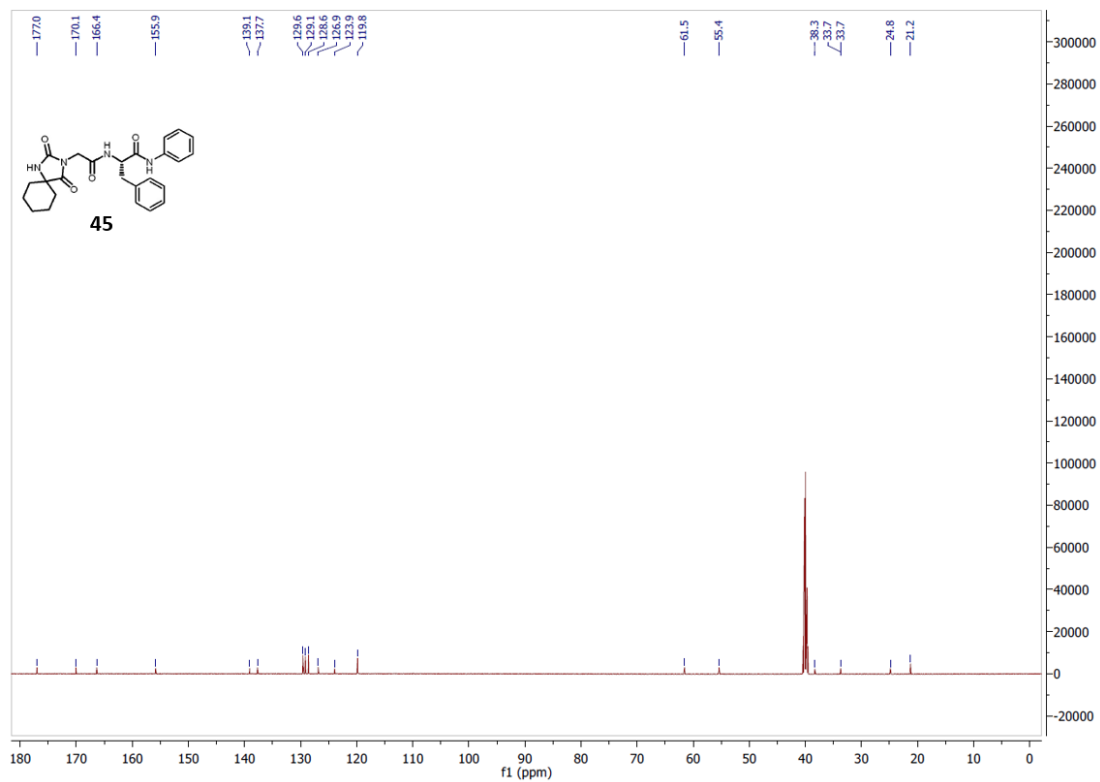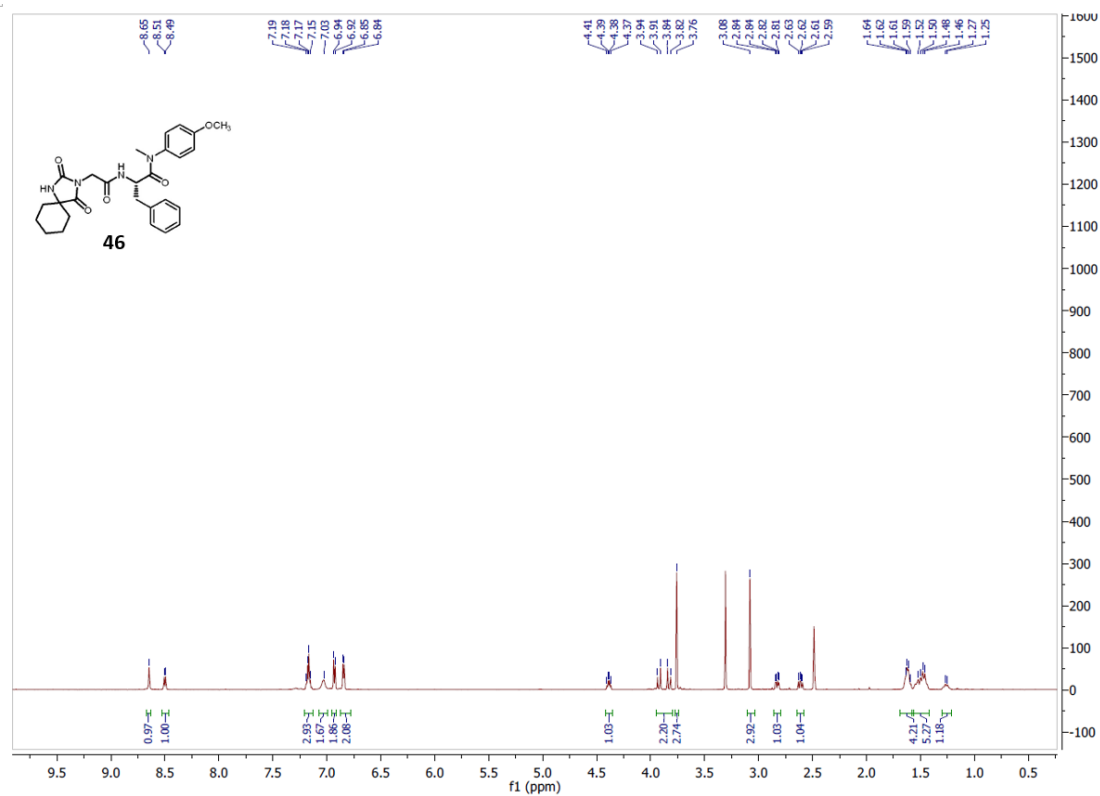

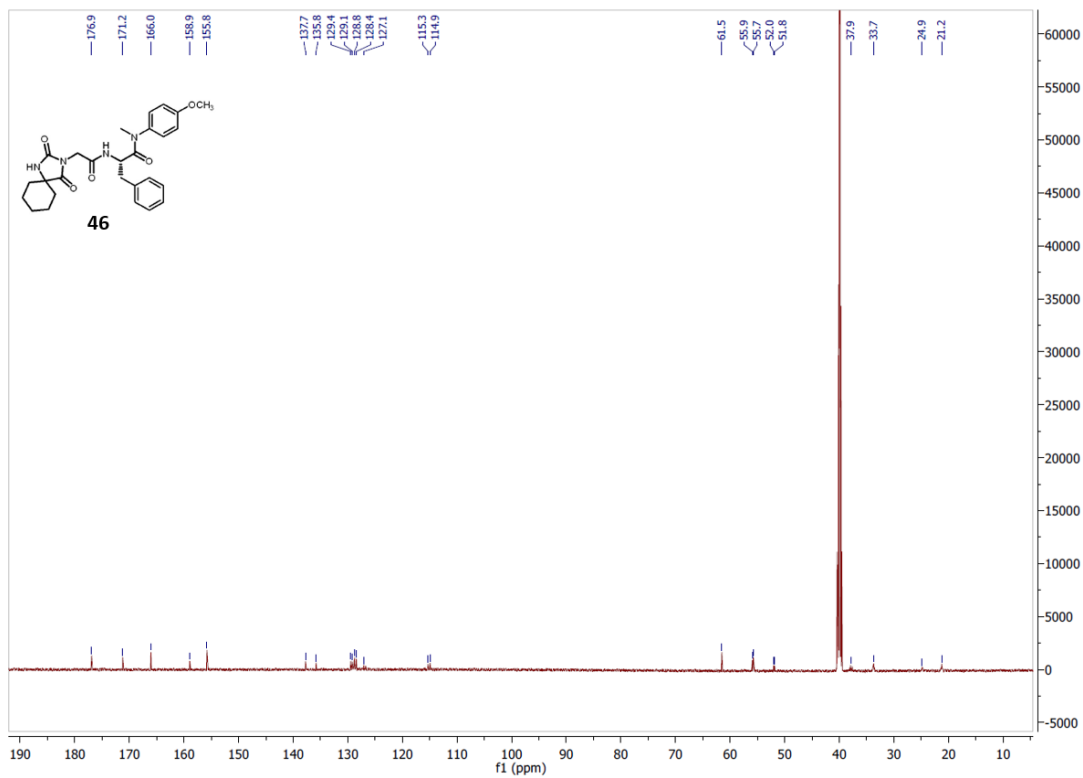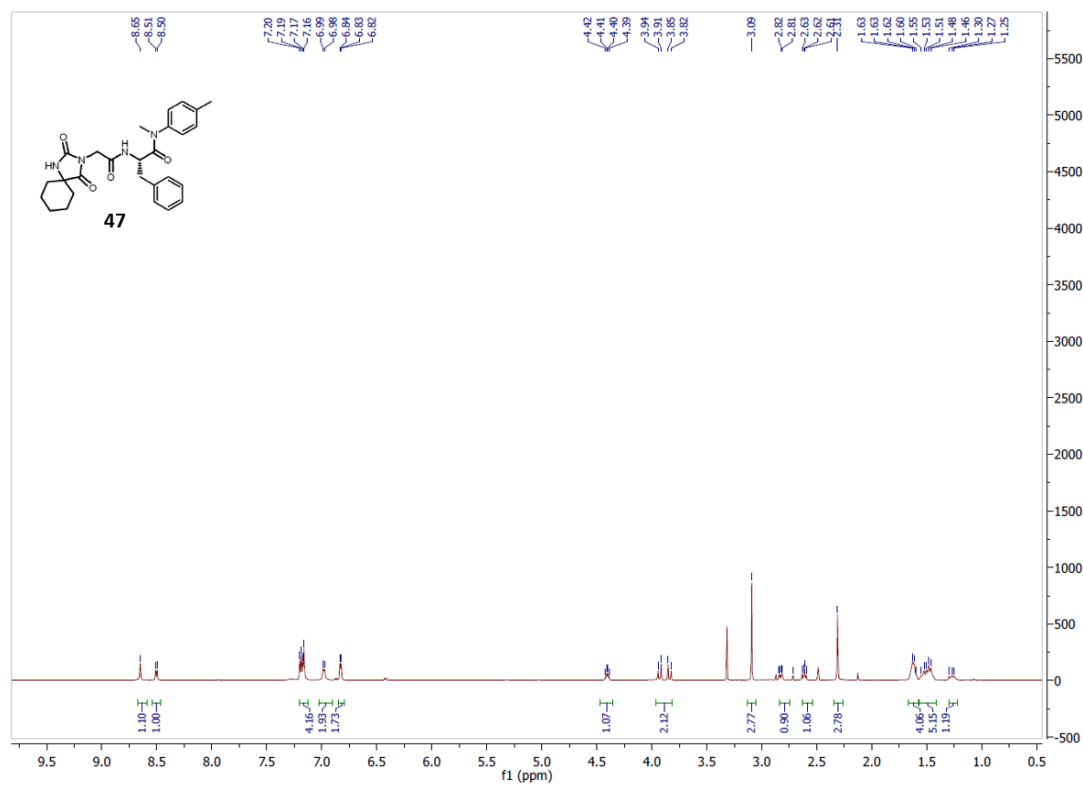



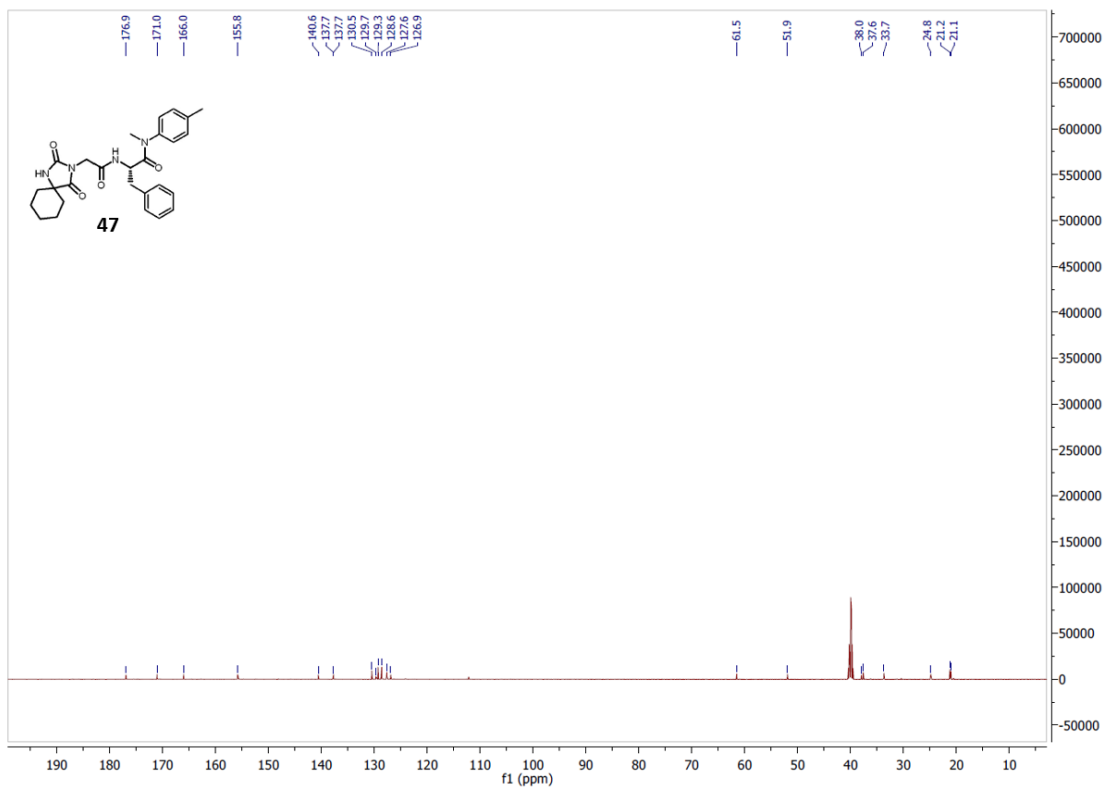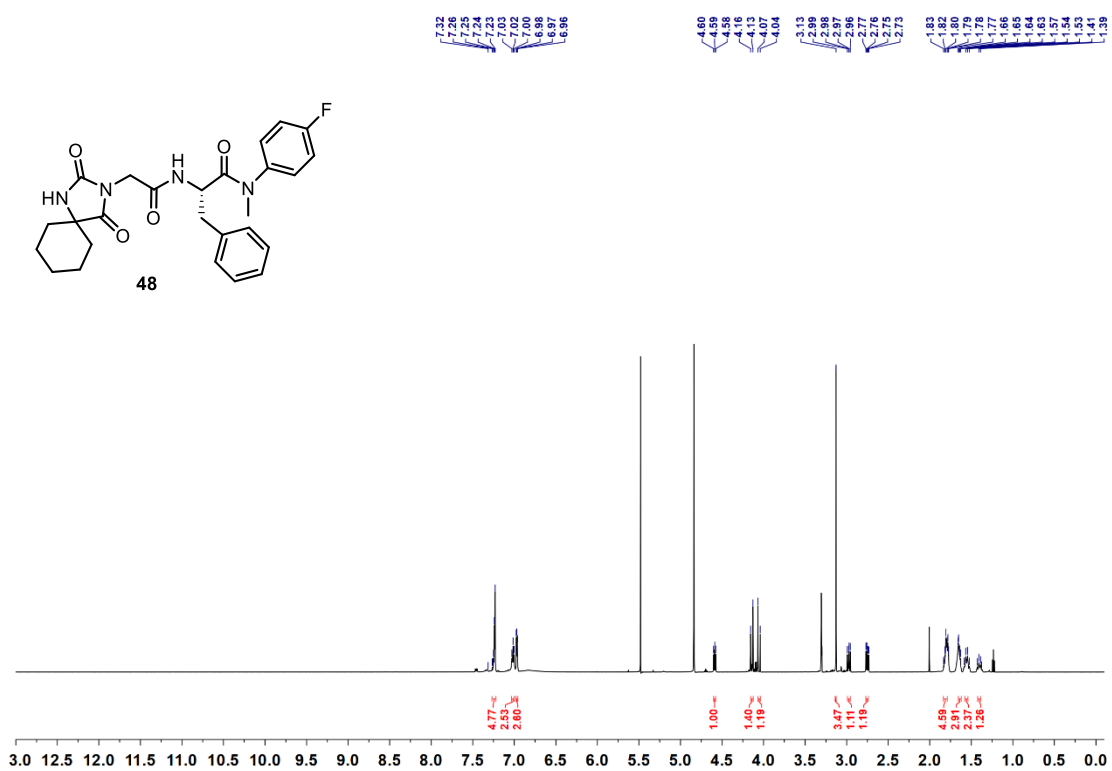

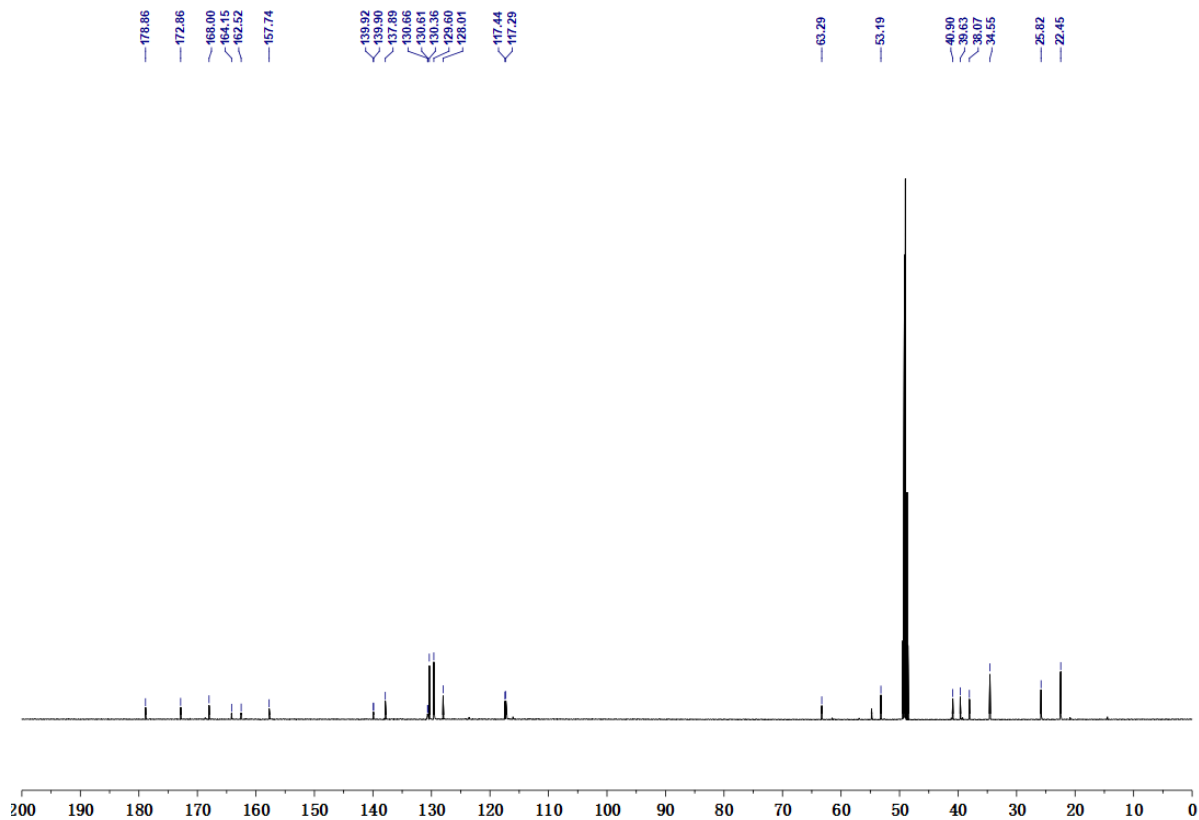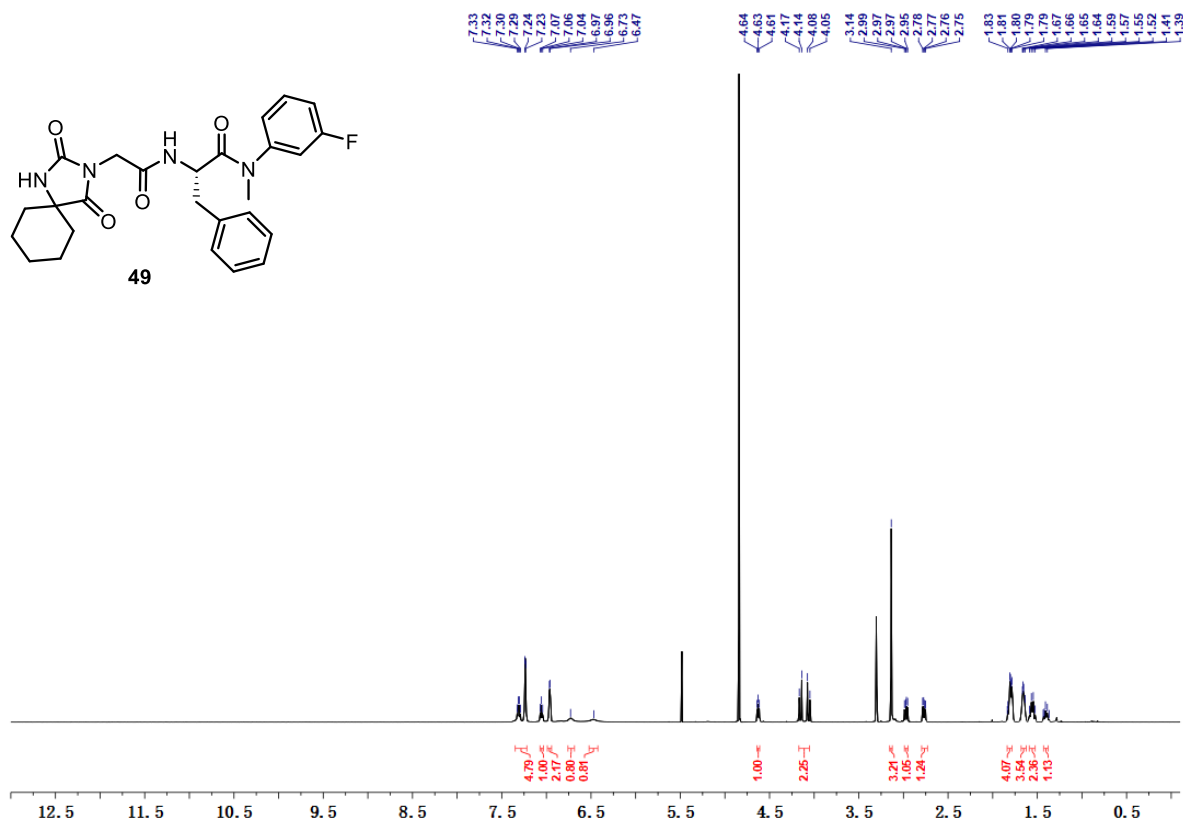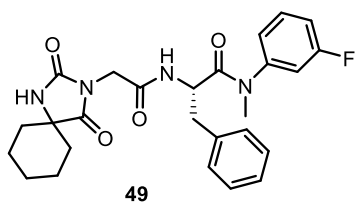

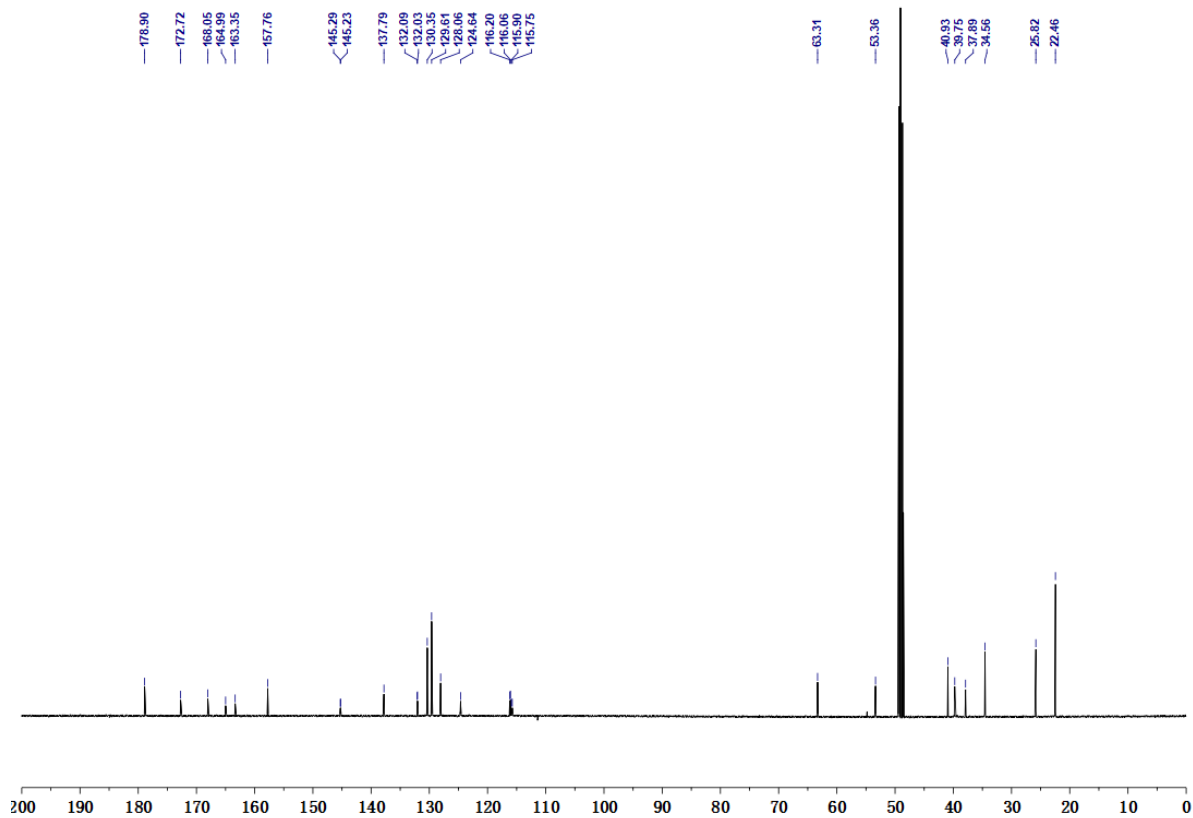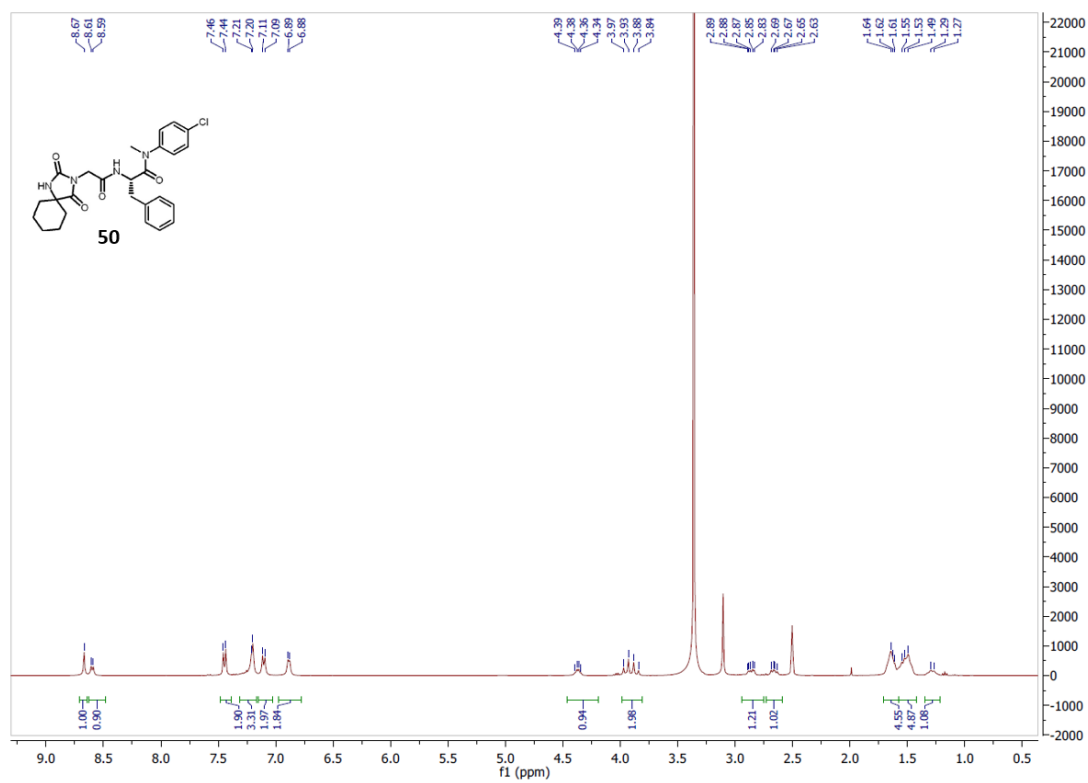

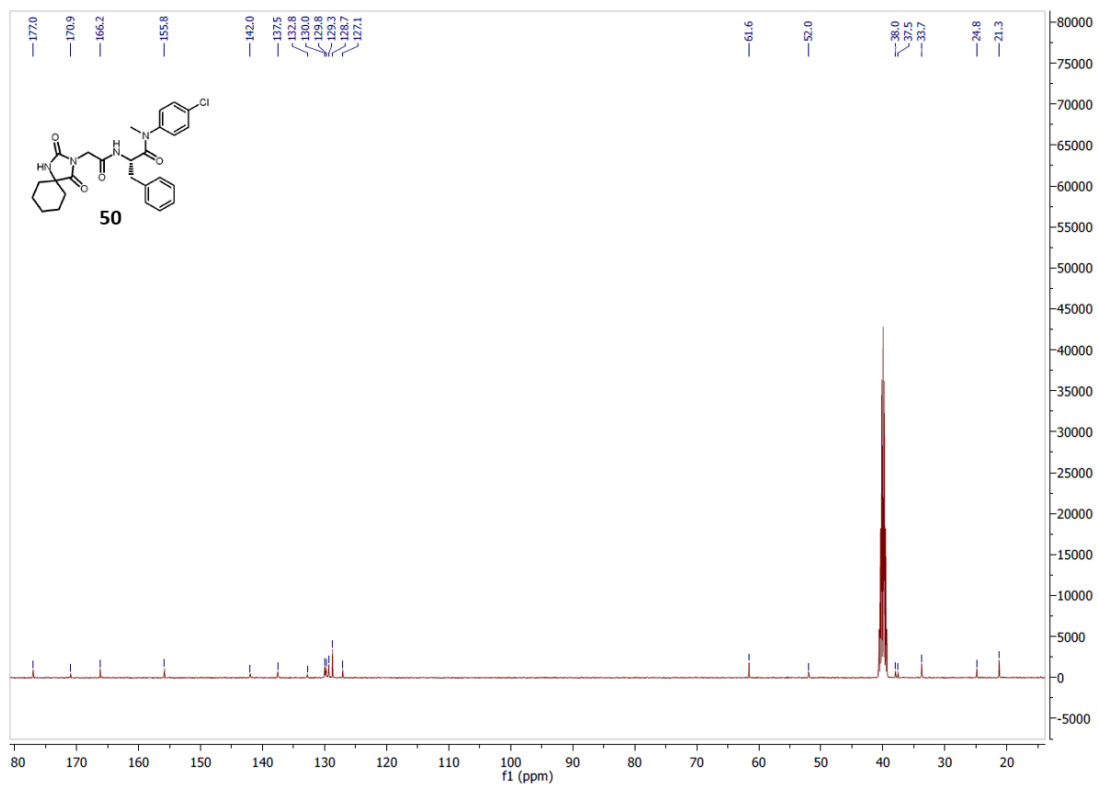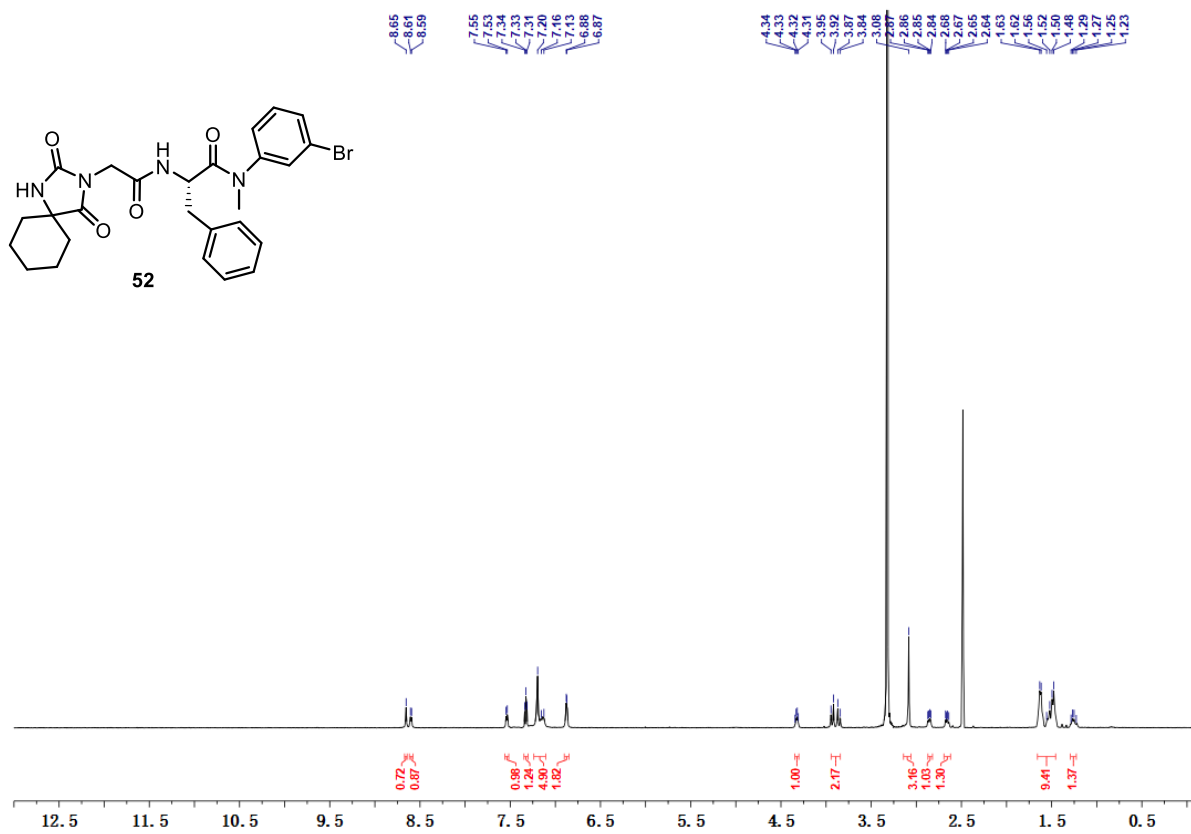

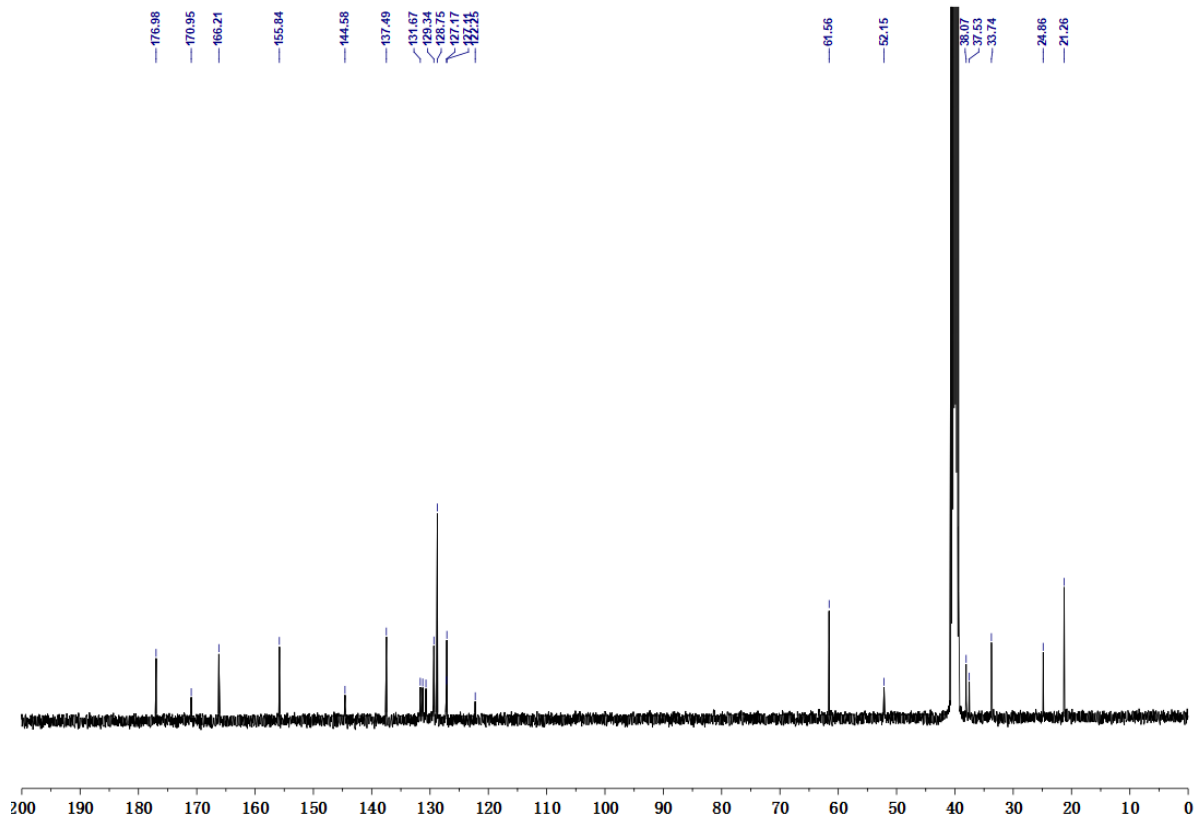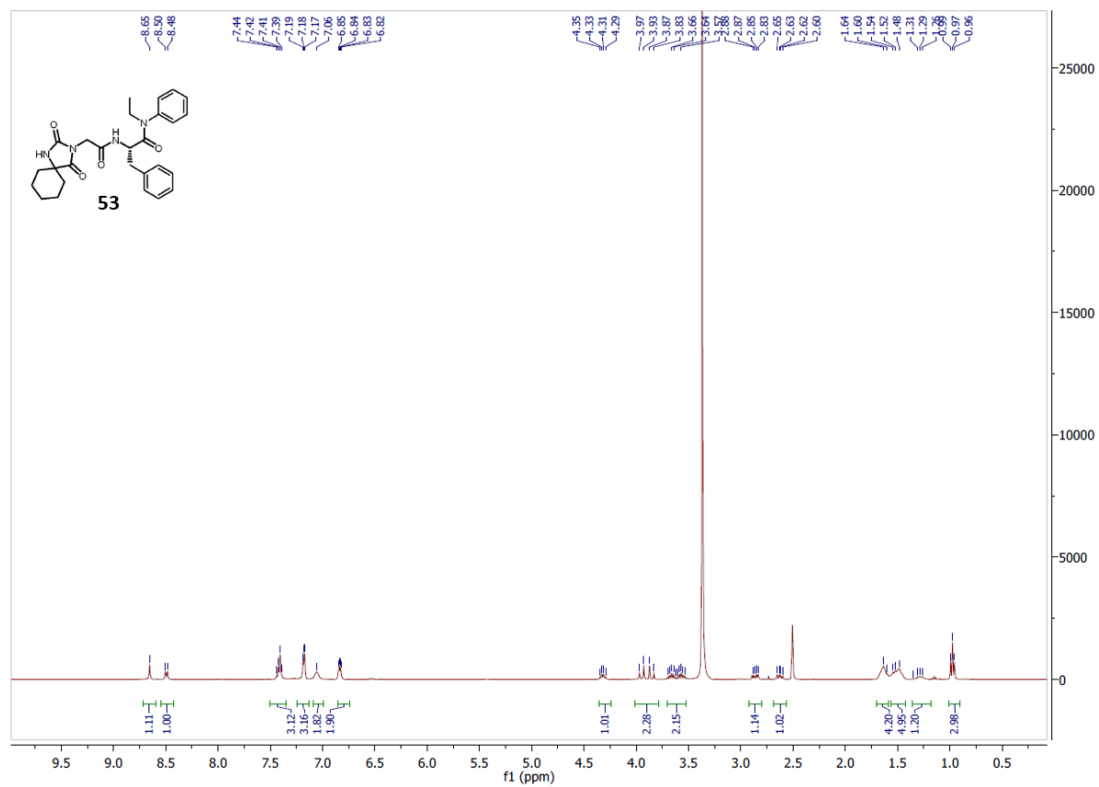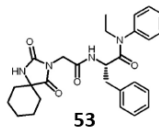

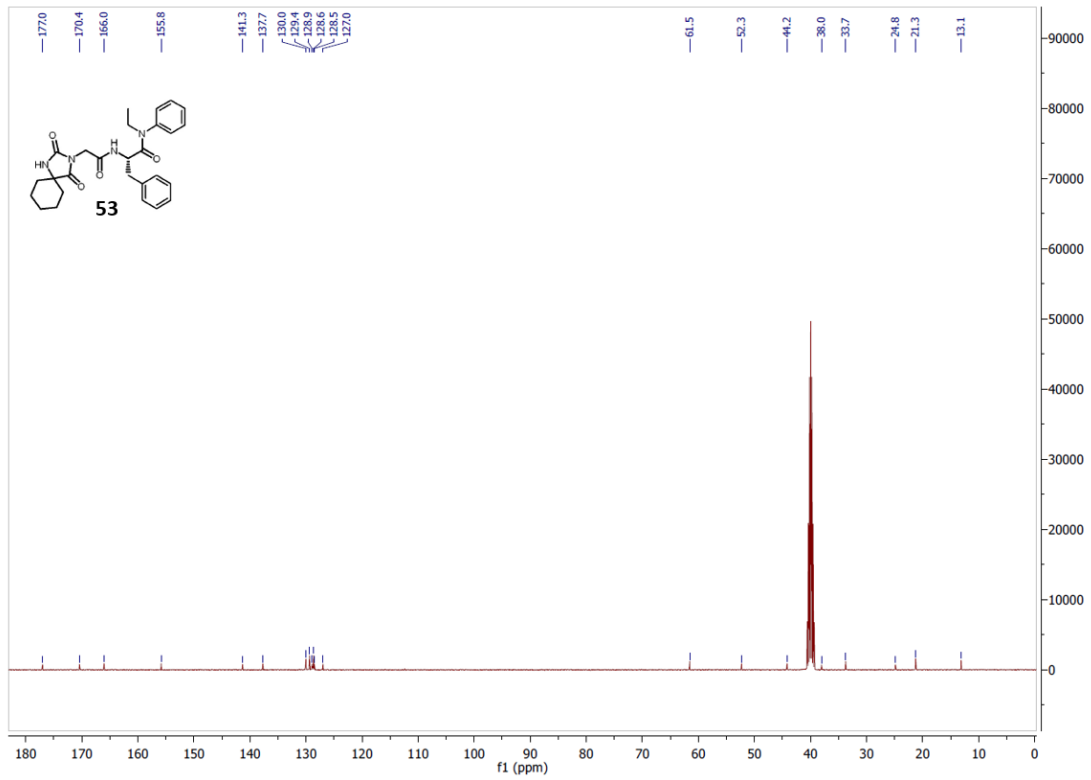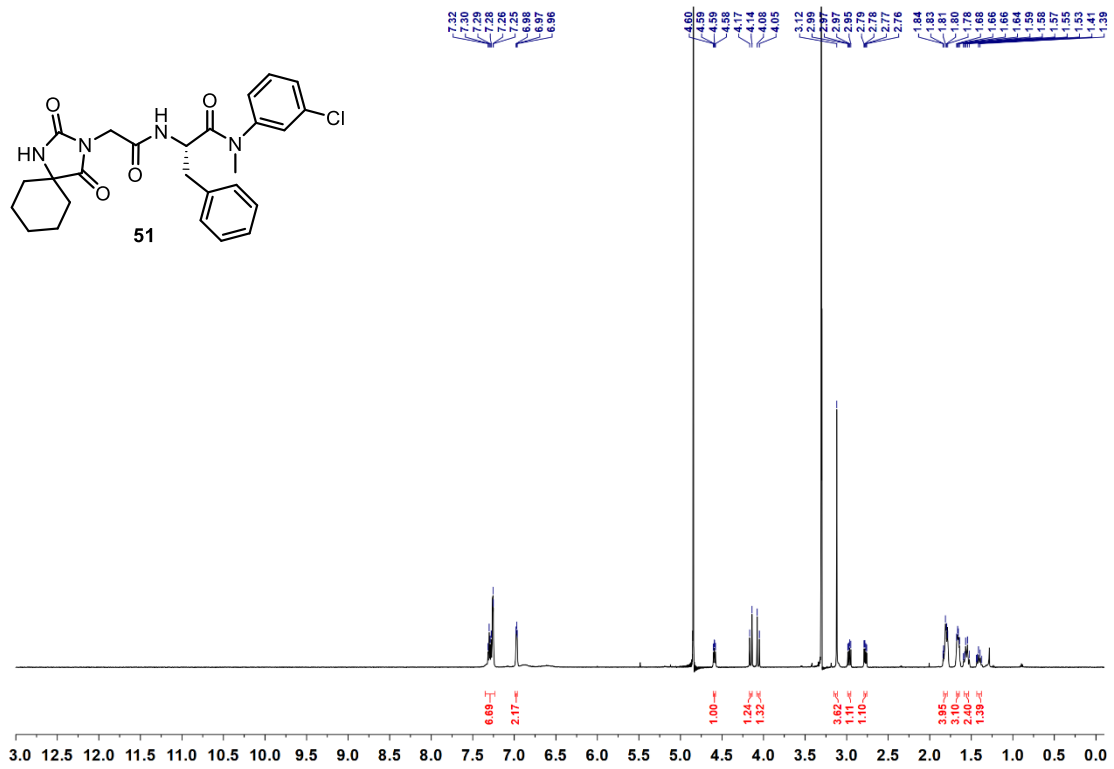

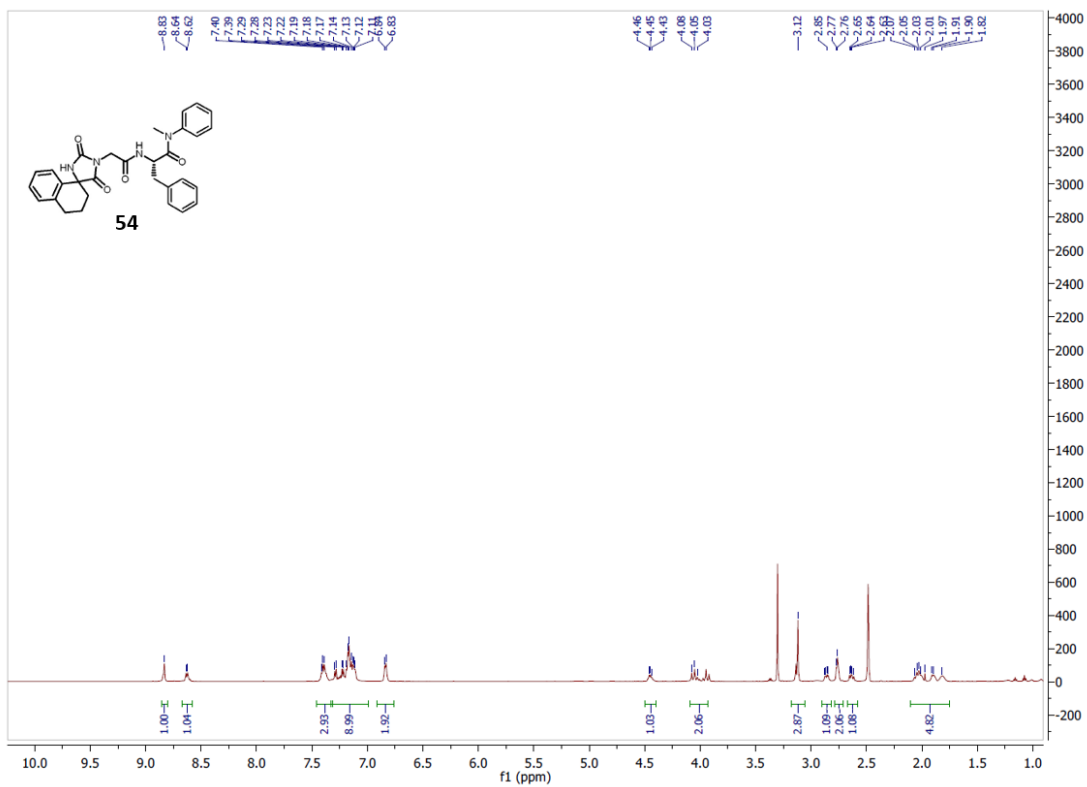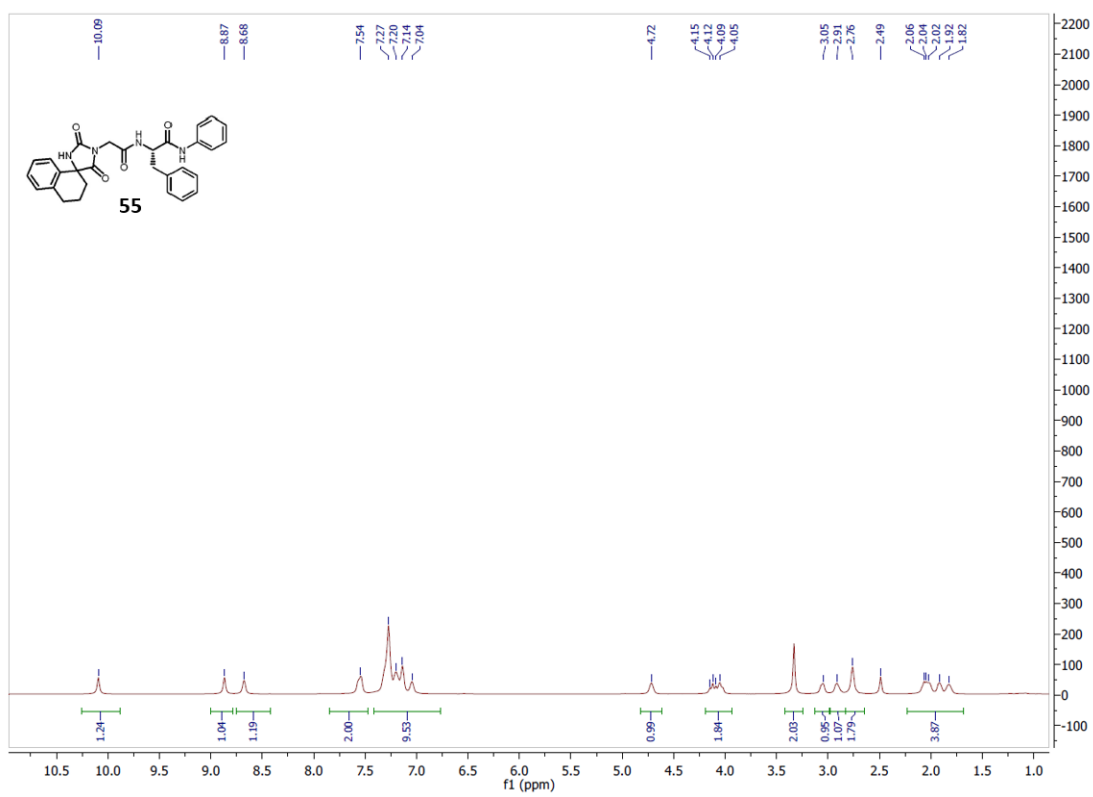

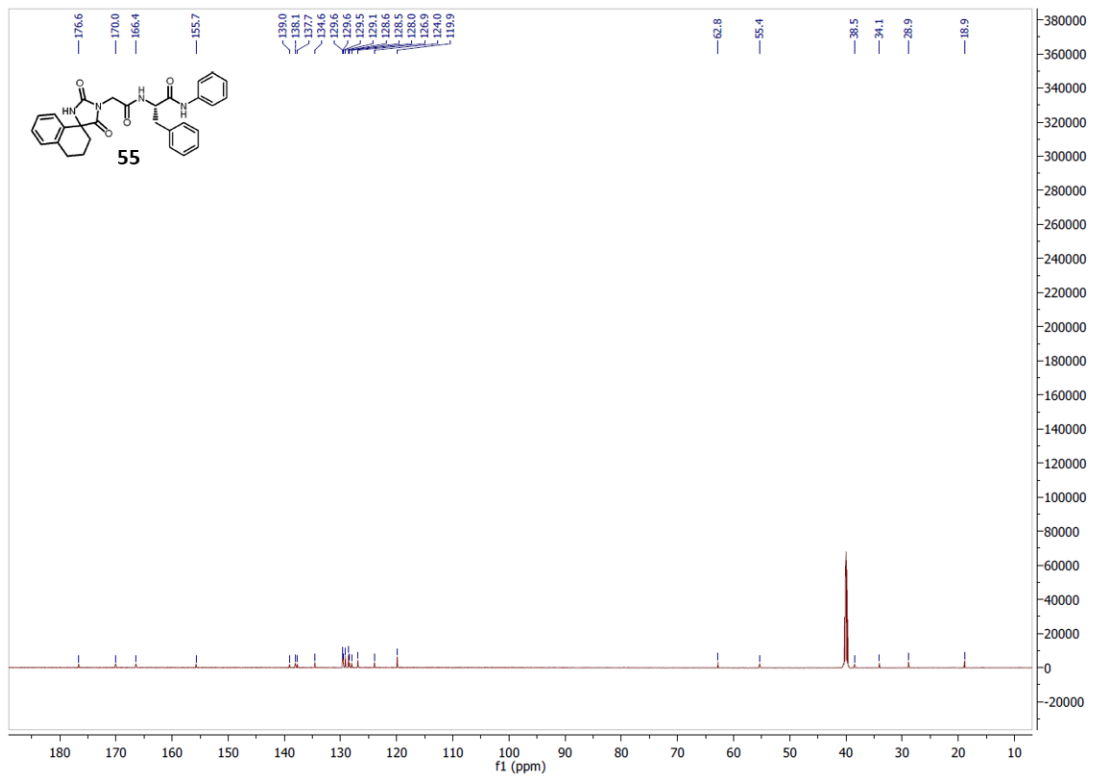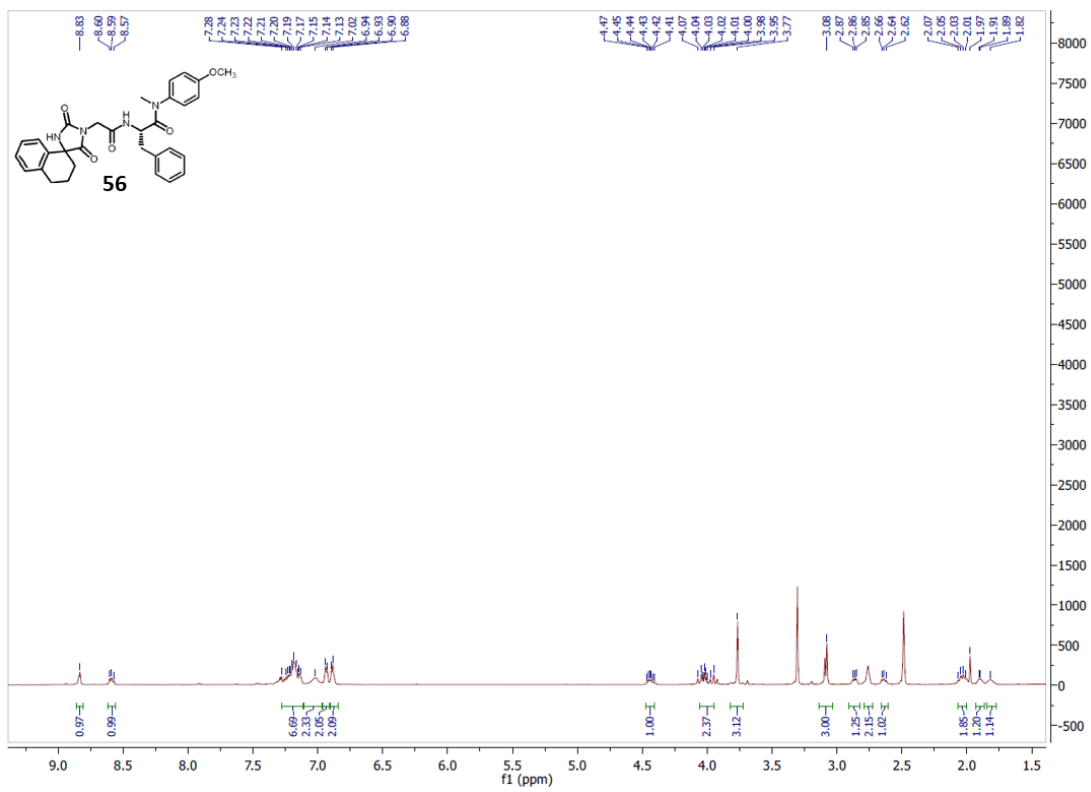



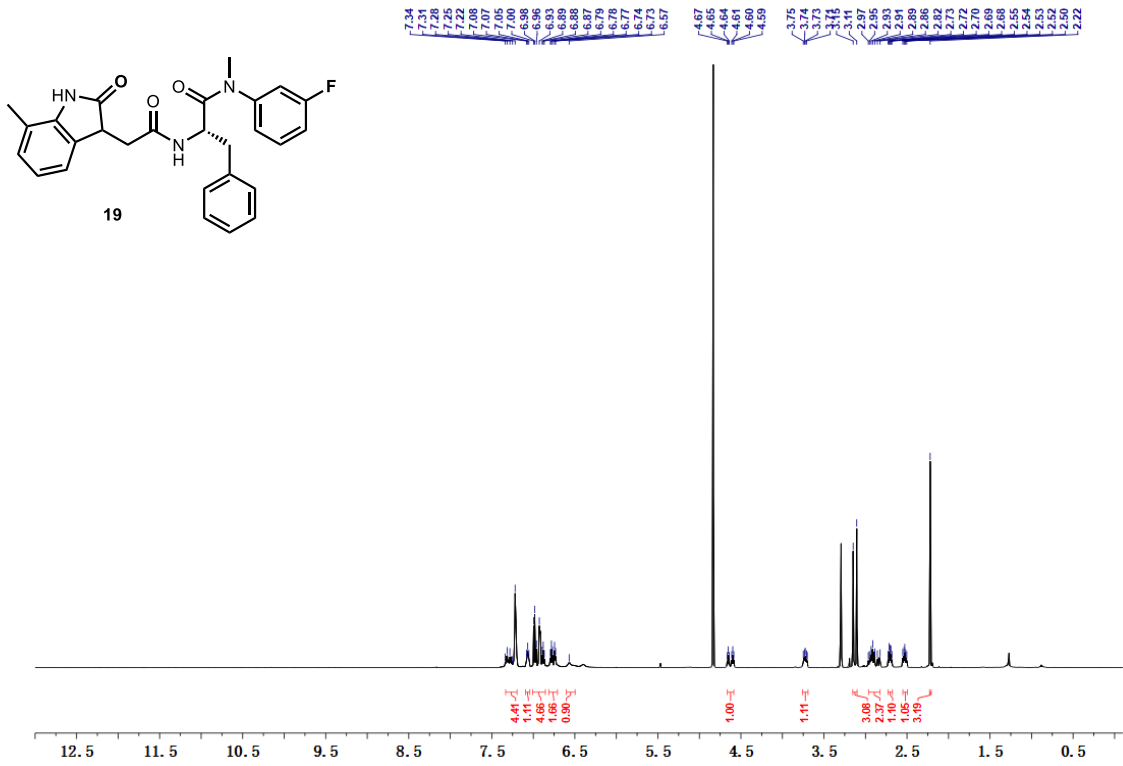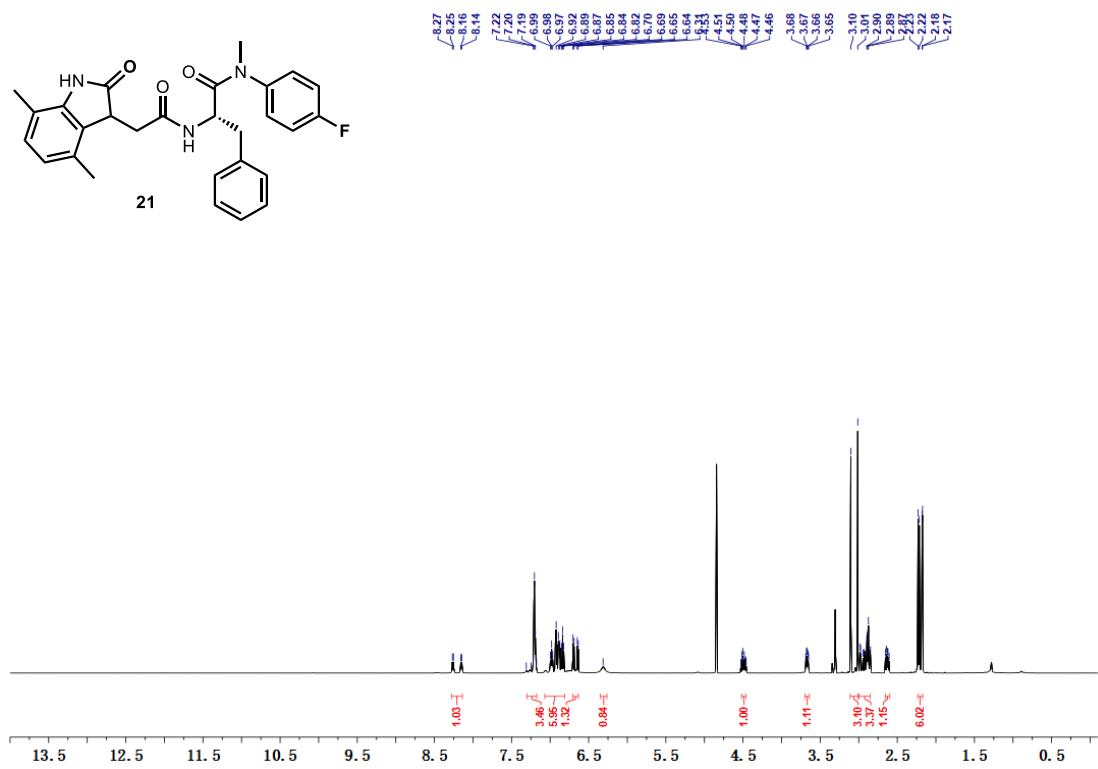

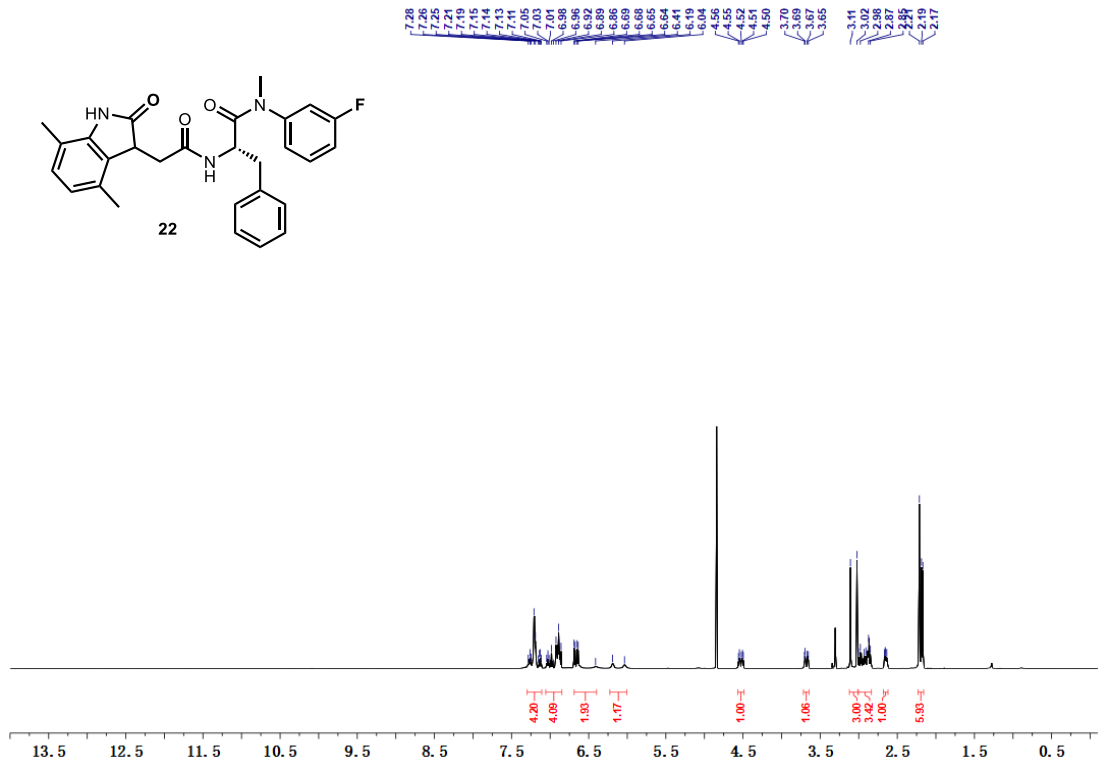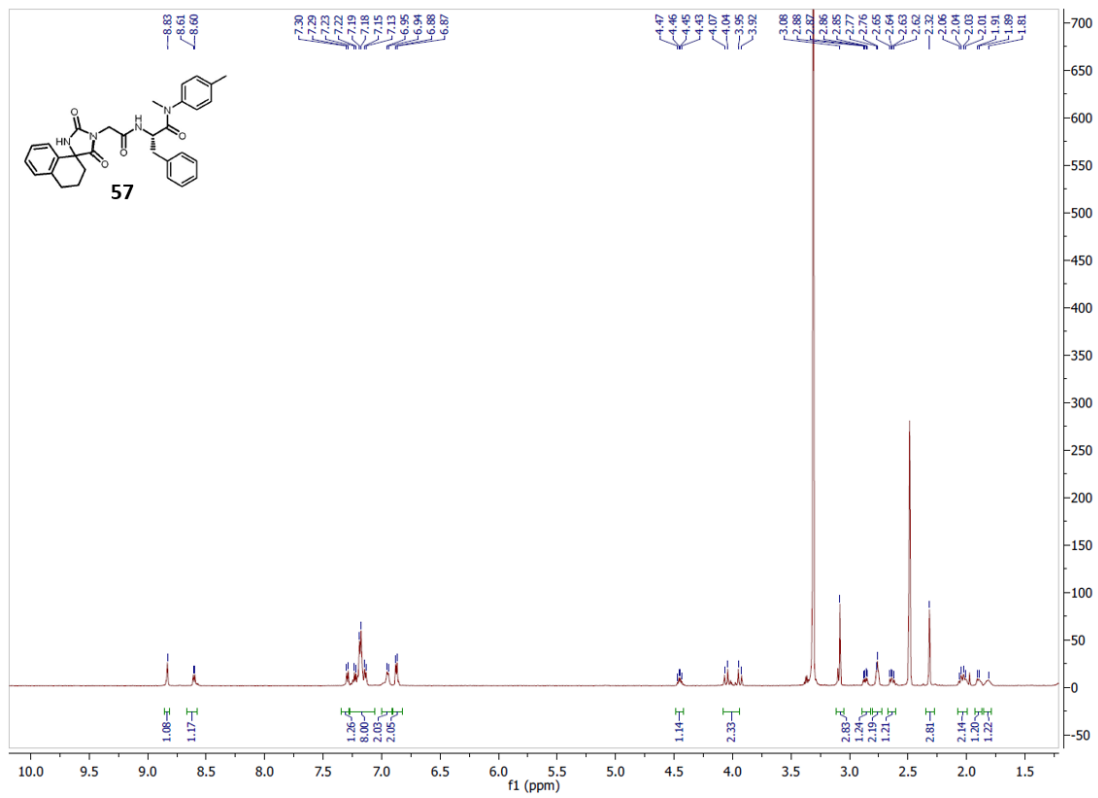

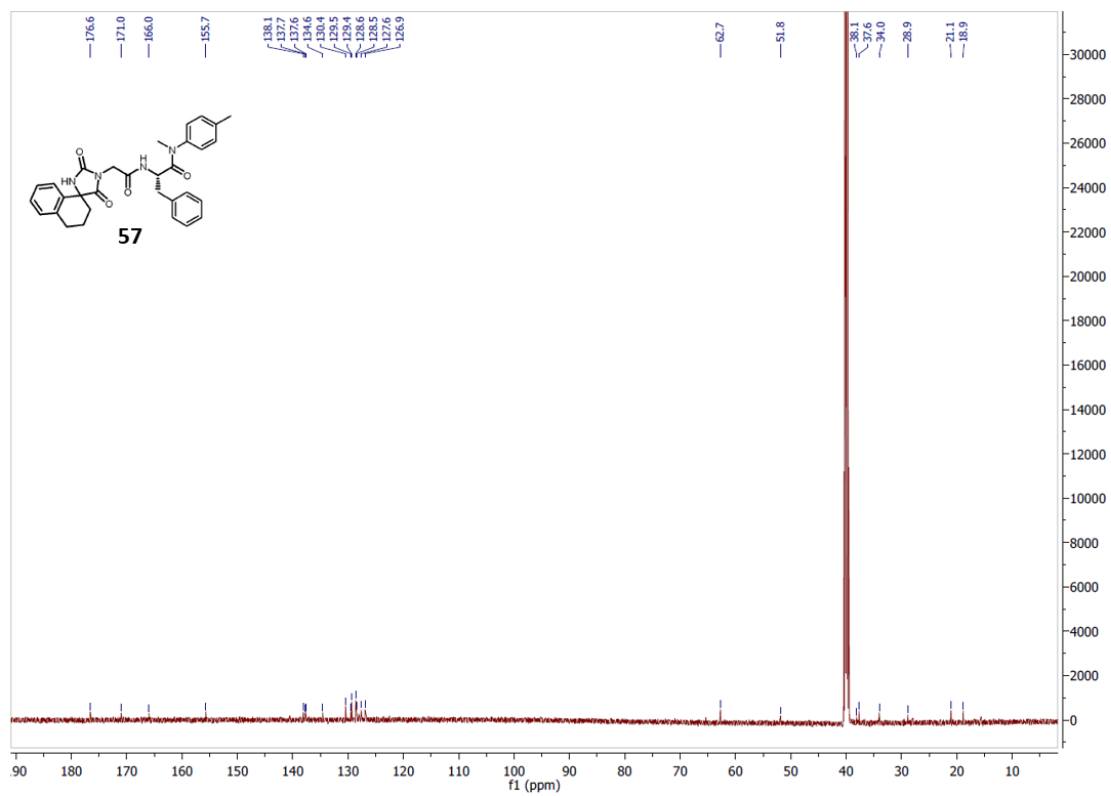

Supplement: NIHMS1629386-supplement-SM.pdf [file NIHMS1629386-supplement-SM.pdf]
